# Supplementary material for: Long Term Response to Circulating Angiogenic Cells, Unstimulated or Atherosclerotic Pre-Conditioned, in Critical Limb Ischemic Mice
Source: MDPI journal article supplement (doi:10.3390/biomedicines9091147), 2021-09-03
Supplement: s1 [file s1]

SUPPLEMENTAL MATERIALS

# Long Term Response to Circulating Angiogenic Cells, Unstimulated or Atherosclerotic Pre-conditioned, in Critical Limb Ischemic Mice

Lucía Beltrán-Camacho <sup>1,2</sup>, Margarita Jiménez-Palomares <sup>1,2</sup>, Ismael Sanchez-Gomar <sup>1,2</sup>, Antonio Rosal-Vela <sup>1,2</sup>, Marta Rojas-Torres <sup>1,2</sup>, Sara Eslava-Alcon <sup>1,2</sup>, Jose Angel Alonso-Piñero <sup>1,2</sup>, Almudena González-Rovira <sup>1,2</sup>, M<sup>a</sup> Jesús Extremera-García <sup>1,2</sup>, Rosario Conejero <sup>3</sup>, Esther Doiz <sup>3</sup>, Manuel Rodríguez-Piñero <sup>3</sup>, Martin R. Larsen <sup>4</sup> and M<sup>a</sup> Carmen Duran-Ruiz <sup>1,2</sup>

<sup>1.</sup> Biomedicine, Biotechnology, and Public Health Department, Cadiz University, 11002 Cadiz, Spain, lucia.beltrancamacho@alum.uca.es (L.B.-C.); margarita.jimenezpalomares@gm.uca.es (M.J.-P.); ismael.sanchez@uca.es (I.S.-G.); antonio.rosal@uca.es (A.R.-V.); marta.rojas@uca.es (M.R.-T.); sara.eslava@gm.uca.es (S.E.-A.); joseangel.alonsopi@alum.uca.es (J.A.A.-P.); almudena.gonzalez@uca.es (A.G.-R.); maria.jesus.extremera.garcia@gmail.com (M.J.E.-G.).

<sup>2.</sup> Institute of Research and Innovation in Biomedical Sciences of Cádiz (INiBICA), 11009 Cádiz, Spain

<sup>3.</sup> Angiology & Vascular Surgery Unit, Hospital Universitario Puerta del Mar, 11009 Cádiz, Spain, rosarioconejero@gmail.com (R.C.); edoiz@comcadiz.com (E.D.); manuel.rodriguez.pinero.sspa@juntadeandalucia.es (M.R.-P.).

<sup>4.</sup> Department of Biochemistry and Molecular Biology, University of Southern Denmark, 5230 Odense, Denmark, mrl@bmb.sdu.dk (M.R.L.).

\* Correspondence: maricarmen.duran@gm.uca.es (M.C.D.-R.)

## Supplementary Materials and Methods:

### Animals.

| Species             | Vendor or Source           | Background Strain                  | Sex    | Persistent ID / URL                                           |
|---------------------|----------------------------|------------------------------------|--------|---------------------------------------------------------------|
| <i>Mus musculus</i> | Charles River Laboratories | Balb-C Nude<br>CAnN.Cg-Foxn1nu/Crl | Female | <a href="https://www.criver.com/">https://www.criver.com/</a> |

### Antibodies.

| Target antigen        | Vendor or Source | Catalog #   | Working concentration (µg/ml)    | Lot #       |
|-----------------------|------------------|-------------|----------------------------------|-------------|
| CD31-FITC             | Biolegend        | 303103      | 8                                | B224876     |
| CD34-APC              | Biolegend        | 343607      | 2                                | B223919     |
| CD45-PBlue            | Biolegend        | 368539      | 4                                | B264395     |
| CD90-PE               | Biolegend        | 328109      | 2                                | B236755     |
| CD73-FITC             | Biolegend        | 344015      | 16                               | B224217     |
| CD105-FITC            | Biolegend        | 323203      | 16                               | B225651     |
| CD309-PE              | Biolegend        | 359903      | 8                                | B245460     |
| CD133-PE              | Miltenyi Biotec  | 130-098-826 | 1:25 concentration not available | 5140404153  |
| CD146-PE              | Biolegend        | 361005      | 4                                | B264161     |
| CD14-PB               | Biolegend        | 367121      | 8                                | B271628     |
| UEA-1-FITC            | Sigma-Aldrich    | L9006       | 3                                | 072M4026V   |
| Dil-ac-LDL            | Biomedal         | BT-902      | 0.6                              |             |
| α-Actin smooth muscle | Sigma            | A5228       | 4                                | 029M4807V   |
| CD31                  | Abcam            | AB32457     | 2                                | GR3200348-2 |
| MOMA-2                | Sigma-Aldrich    | MAB1852     | 1                                | 3026751     |
| Ly-6G                 | Biolegend        | 127601      | 1                                | B265458     |

|                                 |               |        |   |         |
|---------------------------------|---------------|--------|---|---------|
| Alexa Fluor 488 anti-mouse IgG  | Thermo Fisher | A10667 | 4 | 1962792 |
| Alexa Fluor 555 anti-mouse IgG  | Thermo Fisher | A21422 | 4 | 1837985 |
| Alexa Fluor 488 anti-rabbit IgG | Thermo Fisher | A11008 | 4 | 1832425 |
| Alexa Fluor 555 anti-rat IgG    | Thermo Fisher | A21434 | 4 | 1907302 |

## Cultured Cells.

| Name                                | Vendor or Source                   | Sex (F, M, or unknown) |
|-------------------------------------|------------------------------------|------------------------|
| Endothelial progenitor cells (EPCs) | Peripheral blood of healthy donors | Unknown                |

## Atherosclerotic samples.

| Donor     | Age     | Sex (F, M, or unknown) | Smoker | DM2 | Dislipidemia | Hypertension |
|-----------|---------|------------------------|--------|-----|--------------|--------------|
| Patient-1 | 70      | M                      | Yes    | Yes | Yes          | Yes          |
| Patient-2 | 64      | M                      | Yes    | No  | Yes          | Yes          |
| Patient-3 | Unknown | Unknown                | Yes    | No  | Yes          | Yes          |

## Primers.

| Description                | Sequence                                  | Vendor or Source |
|----------------------------|-------------------------------------------|------------------|
| Primers forward            | 5'-GGTGAAACCCCGTCTCTACT-3'                | Metabion         |
| Primers reverse            | 5'-GGTTCAAGCGATTCTCCTGC-3'                | Metabion         |
| Hydrolysis FAM label probe | 5'-(6-FAM)-CGCCCGGCTAATTTTGTAT-(BHQ-1)-3' | Metabion         |

## Data &amp; Code Availability.

| Description                              | Source / Repository | Persistent ID / URL                                                           |
|------------------------------------------|---------------------|-------------------------------------------------------------------------------|
| MS data with identifier number PXD024132 | ProteomeXchange     | <a href="http://www.proteomexchange.org/">http://www.proteomexchange.org/</a> |

## Other.

| Description                                  | Source / Repository |
|----------------------------------------------|---------------------|
| Quick-DNA™ Midiprep Plus Kit (D4075)         | Zymo Research       |
| Proteinase K (D3001-2-B)                     | Zymo Research       |
| TaqMan Universal Master Mix II (4440043)     | Thermo-Fisher       |
| Mouse Cytokine Antibody Array C3 (AAM-CYT-3) | RayBiotech          |
| TGFβ1 ELISA (CSB-E04726m)                    | Cusabio             |

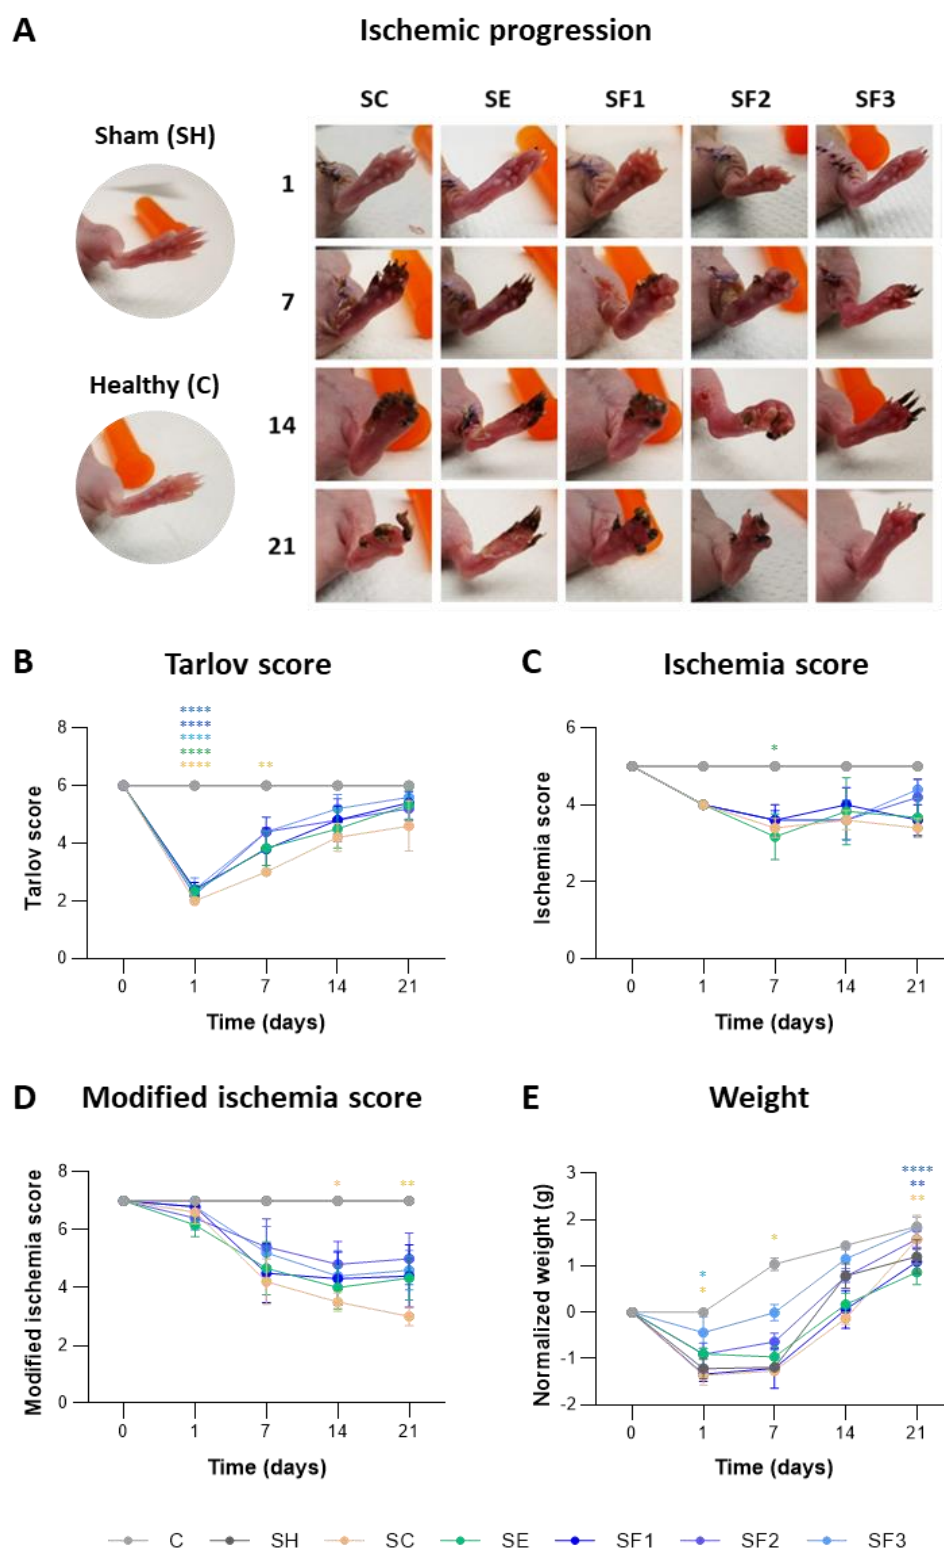

**Figure S1. Evaluation of ischemic symptoms within time.** (A) Representative images of the evolution of ischemic symptoms in mice. (B) Motility changes (Tarlov score) and Ischemic changes according to (C) Ischemia scores and (D) Modified Ischemia scores, all of them described in supplementary table S2. (E) Weight changes. Groups analyzed: Healthy controls (C, n:2); Sham, surgery controls (SH, n:4); ischemic mice, untreated (SC, n:5); ischemic mice with unstimulated CACs (SE, n:6) or pre-stimulated with atherosclerotic factors (SF: n:15: SF1, n:5; SF2, n:5; SF3, n:5). Data were presented as mean  $\pm$  SEM and significant differences were seen by two-way ANOVA and Tukey post-hoc. Statistical differences shown were calculated using the SH group as baseline per day.

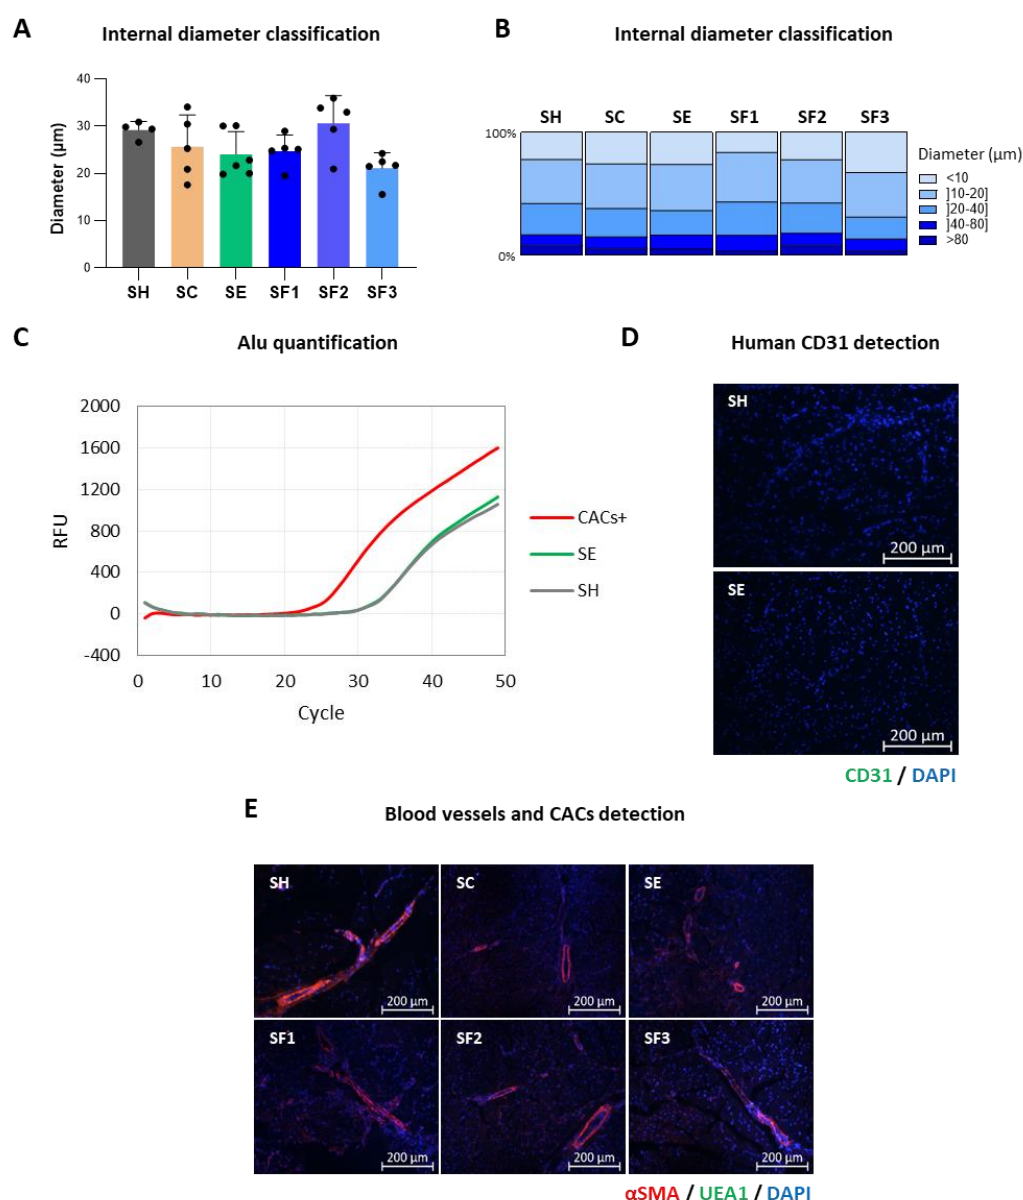

**Figure S2. Human CACs detection and vascular density.** **A)** Diameter size ( $\mu\text{m}$ ). **B)** Vessel classification based on abundance (percentage) of different ranges of internal lumen diameter ( $\mu\text{m}$ ). **C)** Representative results of the amplification of human-specific Alu sequences by qPCR, with the SH group as negative control. A positive result (CACs +, red) obtained from mice sacrificed at early days[1] has also been included. **D)** Representative IHC images using anti-hCD31 (green) and DAPI (blue). **E)** Representative IHC images taken to measure vascular density and diameter size with anti-mouse smooth muscle  $\alpha$ -actin (red), and human cells using UEA1 (green) and DAPI (blue). Groups analyzed: SH: Sham, surgery controls (n:4), SC: Ischemic mice, no cell treatment (n:5), ischemic mice treated with unstimulated CACs (SE, n:6) or with pre-stimulated CACs (SF, n:15: SF1, n:5; SF2, n:5; SF3, n:5). Data were presented as mean  $\pm$  SD and significant differences were seen by Kruskal-Wallis and Dunn's multiple comparisons test.

### Supplementary figure S3

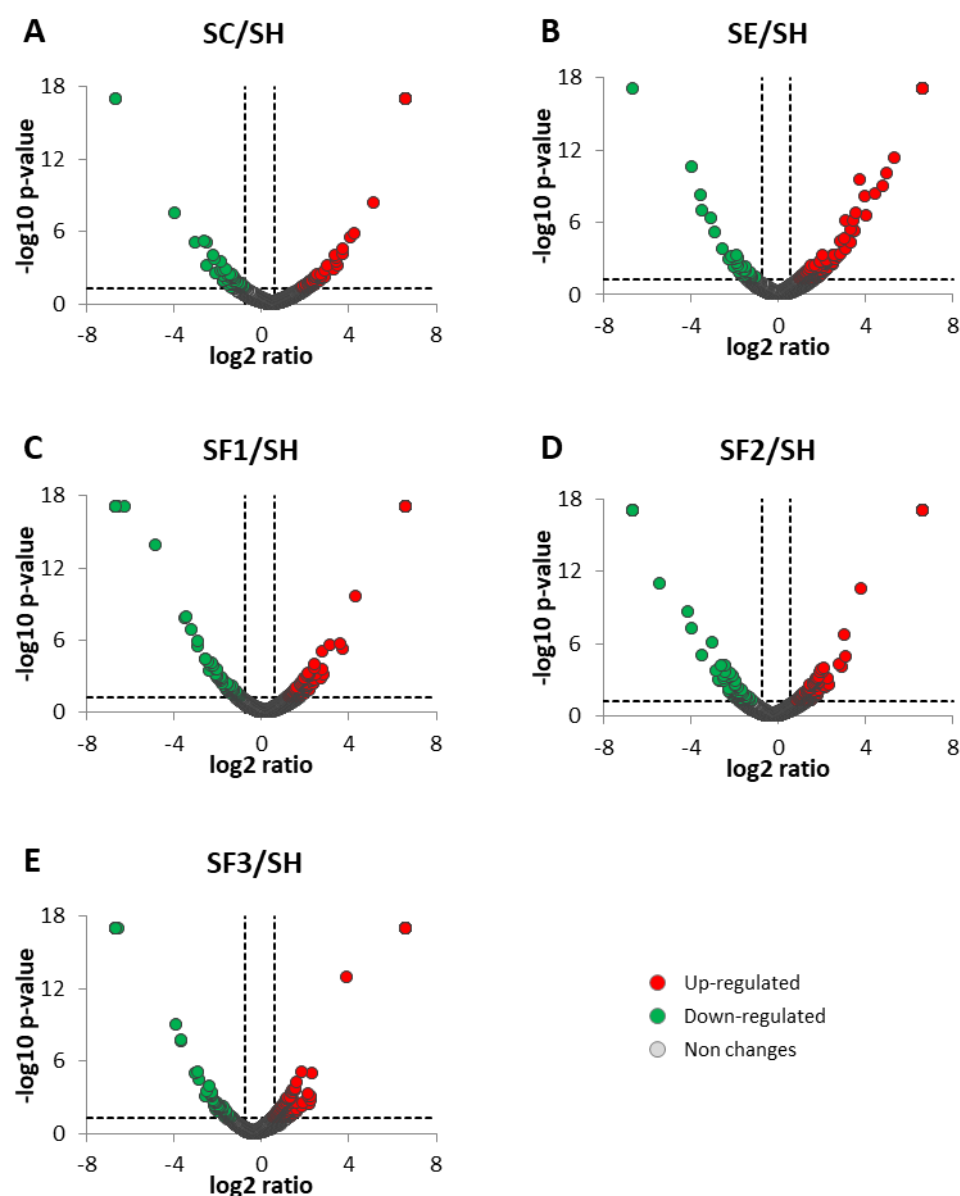

**Figure S3. Volcano plots.** Volcano plots obtained after label free quantification, comparing protein levels in A) SE, B) SC, C) SF1, D) SF2 and E) SF3 vs SH. Cut-off limits: p-value < 0.05, ratios for up-regulated ( $> 1.5$ ) and down-regulated ( $< 0.6$ ) proteins. Groups analyzed: SH: Sham, surgery controls (n:4), SC: Ischemic mice, no cell treatment (n:5), ischemic mice treated with unstimulated CACs (SE, n:6) or with pre-stimulated CACs (SF, n:15: SF1, n:5; SF2, n:5; SF3, n:5).

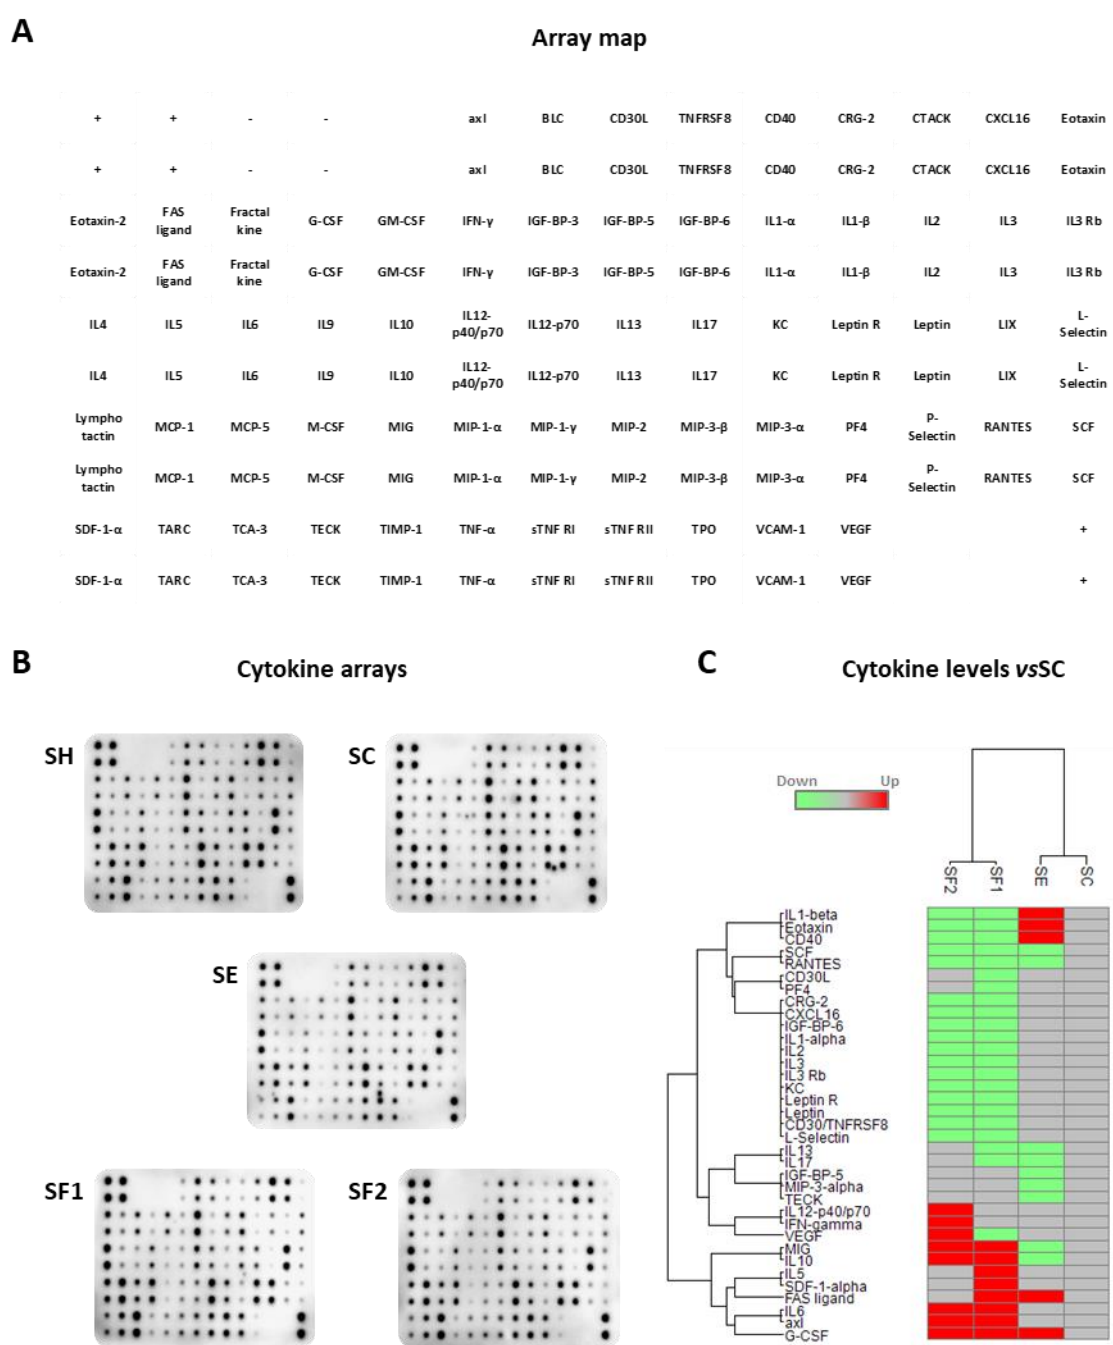

**Figure S4 Cytokine expression arrays.** (A) Map of Mouse Cytokine Antibody Array C3 (RayBiotech; AAM-CYT-3) (B) Cytokine arrays images acquired with ChemiDoc Touch System (Biorad) (C) Hierarchical cluster with differential levels patterns detected in cytokines arrays SE, SF1 and SF2 *vs* SC group. Groups analyzed: SH: Sham, surgery controls (n:4), SC: Ischemic mice, no cell treatment (n:5), ischemic mice treated with unstimulated CACs (SE, n:6) or with pre-stimulated CACs (SF, n:15: SF1, n:5; SF2, n:5).

**Table S1. Functional scoring related to ischemia.** The table includes (from left to right): Tarlov score (evaluating motility, leg movement and difficulty walking), ischemia score (ischemic symptoms, advance of the characteristics along the leg) and modified ischemia score (scores adapted to mice studies, evaluating the advance of the characteristics along the leg) [2, 3].

| Score | Tarlov      | Ischemia                          | Modified ischemia      |
|-------|-------------|-----------------------------------|------------------------|
| 0     | No movement | Auto-amputation > half lower limb | Auto-amputation of leg |

|   |                                                 |                                                                   |                              |
|---|-------------------------------------------------|-------------------------------------------------------------------|------------------------------|
| 1 | Barely perceptible movement, non-weight bearing | Gangrenous tissue > half foot                                     | Leg necrosis                 |
| 2 | Frequent movement, non-weight bearing           | Gangrenous tissue < half foot, with lower limb muscle necrosis    | Foot necrosis                |
| 3 | Support weight, partial weight bearing          | Gangrenous tissue < half foot, without lower limb muscle necrosis | Discoloration of > two toes  |
| 4 | Walks with mild deficit                         | Pale foot or gait abnormalities                                   | Discoloration of one toe     |
| 5 | Normal but slow walking                         | Normal                                                            | Discoloration of > two nails |
| 6 | Full and fast walking                           |                                                                   | Discoloration of one nail    |
| 7 |                                                 |                                                                   | No necrosis                  |

**Table S2. Quantitative analysis of proteins differentially expressed (vs SH).** The table includes (from left to right): UniProt accession number, protein description, abundance ratio (considering up-regulated ratio > 1.5 and down-regulated ratio < 0.6), p-value (considering P-value < 0.05 as differentially significant), number of amino acids (AAs), number of peptide sequences (PSMs), number of unique peptides and coverage percentage.

| Accession | Description                                | Abundance ratio |           |                      |           |           | P-value              |           |           |                      |           | #AAs | #PSMs | #Unique Peptides | Coverage [%] |
|-----------|--------------------------------------------|-----------------|-----------|----------------------|-----------|-----------|----------------------|-----------|-----------|----------------------|-----------|------|-------|------------------|--------------|
|           |                                            | SC/S<br>H       | SE/S<br>H | SF1/SSF2/SSF3/S<br>H | SC/S<br>H | SE/S<br>H | SF1/SSF2/SSF3/S<br>H | SC/S<br>H | SE/S<br>H | SF1/SSF2/SSF3/S<br>H | SC/S<br>H |      |       |                  |              |
| Q9CQI6    | Coactosin-like protein                     | 4.853           | 2.755     | 2.892                | 2.642     | 2.008     | 0.015                | 0.014     | 0.026     | 0.009                | 0.007     | 142  | 445   | 9                | 61           |
| P70333    | Heterogeneous nuclear ribonucleoprotein H2 | 4.631           | 2.532     | 2.942                | 2.384     | 2.009     | 0.023                | 0.031     | 0.015     | 0.011                | 0.004     | 449  | 730   | 7                | 47           |
| P40124    | Adenylyl cyclase-associated protein 1      | 4.864           | 2.478     | 2.779                | 2.548     | 1.934     | 0.013                | 0.016     | 0.020     | 0.013                | 0.006     | 474  | 1637  | 27               | 64           |
| Q6R891    | Neurabin-2                                 | 10.92           | 6.179     | 7.281                | 7.101     | 4.894     | 0.000                | 0.001     | 0.000     | 0.000                | 0.001     | 817  | 60    | 2                | 2            |
| P40142    | Transketolase                              | 4.075           | 2.319     | 3.714                | 3.091     | 2.327     | 0.031                | 0.020     | 0.002     | 0.002                | 0.001     | 623  | 3318  | 41               | 79           |
| P97352    | Protein S100-A13                           | 5.242           | 3.496     | 3.599                | 3.450     | 2.447     | 0.016                | 0.005     | 0.011     | 0.000                | 0.002     | 98   | 231   | 5                | 46           |
| P14602    | Heat shock protein beta-1                  | 4.397           | 2.898     | 3.953                | 3.099     | 2.689     | 0.022                | 0.008     | 0.001     | 0.002                | 0.000     | 209  | 776   | 11               | 55           |
| Q8VHX6    | Filamin-C                                  | 4.646           | 2.771     | 2.934                | 2.392     | 2.041     | 0.017                | 0.006     | 0.014     | 0.012                | 0.004     | 2726 | 6468  | 126              | 66           |
| Q6IRU2    | Tropomyosin alpha-4 chain                  | 5.229           | 3.034     | 3.377                | 3.102     | 1.949     | 0.013                | 0.009     | 0.010     | 0.002                | 0.014     | 248  | 811   | 13               | 55           |
| O89017    | Legumain                                   | 10.66           | 4.814     | 5.151                | 3.625     | 2.223     | 0.000                | 0.002     | 0.002     | 0.000                | 0.029     | 435  | 226   | 7                | 21           |
| P13516    | Acyl-CoA desaturase 1                      | 7.491           | 3.195     | 8.946                | 3.625     | 5.043     | 0.002                | 0.033     | 0.000     | 0.002                | 0.000     | 355  | 183   | 8                | 30           |
| P15105    | Glutamine synthetase                       | 4.738           | 2.206     | 4.507                | 3.584     | 2.603     | 0.015                | 0.027     | 0.000     | 0.000                | 0.000     | 373  | 2095  | 25               | 68           |
| Q61553    | Fascin                                     | 4.656           | 2.296     | 2.967                | 2.764     | 2.016     | 0.016                | 0.027     | 0.013     | 0.008                | 0.004     | 493  | 798   | 21               | 52           |
| Q9D154    | Leukocyte elastase inhibitor A             | 4.480           | 2.165     | 2.457                | 2.123     | 1.583     | 0.020                | 0.030     | 0.042     | 0.023                | 0.030     | 379  | 1610  | 29               | 63           |
| P19324    | Serpin H1                                  | 8.244           | 2.965     | 4.758                | 4.305     | 3.003     | 0.000                | 0.009     | 0.000     | 0.000                | 0.000     | 417  | 760   | 16               | 53           |
| Q91V92    | ATP-citrate synthase                       | 5.596           | 2.150     | 5.482                | 4.115     | 3.085     | 0.006                | 0.032     | 0.000     | 0.000                | 0.000     | 1091 | 5085  | 69               | 74           |
| P16110    | Galectin-3                                 | 10.64           | 4.224     | 4.736                | 3.840     | 2.495     | 0.000                | 0.000     | 0.000     | 0.000                | 0.001     | 264  | 497   | 12               | 38           |
| P07091    | Protein S100-A4                            | 5.809           | 3.024     | 3.430                | 3.370     | 2.840     | 0.007                | 0.009     | 0.012     | 0.001                | 0.000     | 101  | 179   | 5                | 43           |



|         |                                                        |       |       |       |       |       |       |       |       |       |       |      |       |     |    |
|---------|--------------------------------------------------------|-------|-------|-------|-------|-------|-------|-------|-------|-------|-------|------|-------|-----|----|
| P47739  | Aldehyde dehydrogenase, dimeric NADP-preferring        | 6.625 | 2.439 | 3.758 | 8.165 | 3.019 | 0.003 | 0.038 | 0.005 | 0.000 | 0.000 | 453  | 473   | 21  | 64 |
|         |                                                        | 0     | 0     | 0     | 0     | 0     | 9     | 7     | 9     | 0     | 2     |      |       |     |    |
| Q9WV32  | Actin-related protein 2/3 complex subunit 1B           | 5.103 | 2.860 | 3.227 | 3.067 | 2.184 | 0.012 | 0.018 | 0.011 | 0.002 | 0.002 | 372  | 757   | 19  | 60 |
|         |                                                        | 0     | 0     | 0     | 0     | 0     | 5     | 1     | 6     | 2     | 2     |      |       |     |    |
| Q9ERN0  | Secretory carrier-associated membrane protein 2        | 5.359 | 3.691 | 3.857 | 3.030 | 2.238 | 0.014 | 0.019 | 0.018 | 0.018 | 0.049 | 329  | 12    | 2   | 4  |
|         |                                                        | 0     | 0     | 0     | 0     | 0     | 4     | 6     | 9     | 8     | 9     |      |       |     |    |
| P61965  | WD repeat-containing protein 5                         | 19.13 | 15.94 | 20.23 | 14.33 | 15.10 | 0.000 | 0.000 | 0.000 | 0.000 | 0.000 | 334  | 4     | 2   | 10 |
|         |                                                        | 70    | 10    | 10    | 20    | 70    | 0     | 0     | 0     | 0     | 0     |      |       |     |    |
| O88569  | Heterogeneous nuclear ribonucleoproteins A2/B1         | 3.755 | 2.272 | 2.558 | 2.326 | 1.756 | 0.044 | 0.023 | 0.033 | 0.014 | 0.014 | 353  | 1562  | 19  | 50 |
|         |                                                        | 0     | 0     | 0     | 0     | 0     | 8     | 1     | 6     | 2     | 2     |      |       |     |    |
| Q9WV54  | Acid ceramidase                                        | 4.684 | 2.419 | 2.672 | 2.512 | 2.068 | 0.021 | 0.037 | 0.044 | 0.010 | 0.008 | 394  | 430   | 15  | 46 |
|         |                                                        | 0     | 0     | 0     | 0     | 0     | 3     | 1     | 4     | 5     | 2     |      |       |     |    |
| P29391  | Ferritin light chain 1                                 | 5.496 | 2.689 | 3.482 | 2.878 | 1.822 | 0.007 | 0.010 | 0.004 | 0.005 | 0.010 | 183  | 773   | 18  | 90 |
|         |                                                        | 0     | 0     | 0     | 0     | 0     | 2     | 3     | 5     | 7     | 6     |      |       |     |    |
| P19096  | Fatty acid synthase                                    | 6.007 | 2.390 | 6.958 | 3.500 | 3.634 | 0.004 | 0.016 | 0.000 | 0.000 | 0.000 | 2504 | 15771 | 150 | 78 |
|         |                                                        | 0     | 0     | 0     | 0     | 0     | 4     | 8     | 0     | 9     | 0     |      |       |     |    |
| P10107  | Annexin A1                                             | 3.842 | 2.430 | 2.522 | 2.279 | 1.635 | 0.040 | 0.015 | 0.036 | 0.016 | 0.024 | 346  | 1800  | 32  | 76 |
|         |                                                        | 0     | 0     | 0     | 0     | 0     | 6     | 2     | 4     | 0     | 0     |      |       |     |    |
| Q9ES30  | Complement C1q tumor necrosis factor-related protein 3 | 35.40 | 21.65 | 13.56 | 7.780 | 2.703 | 0.000 | 0.000 | 0.000 | 0.000 | 0.026 | 246  | 26    | 3   | 13 |
|         |                                                        | 10    | 70    | 80    | 0     | 0     | 0     | 0     | 0     | 1     | 3     |      |       |     |    |
| P49312  | Heterogeneous nuclear ribonucleoprotein A1             | 3.845 | 2.108 | 2.393 | 2.168 | 1.722 | 0.040 | 0.042 | 0.048 | 0.016 | 0.016 | 320  | 1305  | 18  | 55 |
|         |                                                        | 0     | 0     | 0     | 0     | 0     | 5     | 3     | 6     | 8     | 4     |      |       |     |    |
| Q61233  | Plastin-2                                              | 4.971 | 2.737 | 2.598 | 2.417 | 1.550 | 0.012 | 0.006 | 0.030 | 0.011 | 0.034 | 627  | 1840  | 42  | 88 |
|         |                                                        | 0     | 0     | 0     | 0     | 0     | 1     | 6     | 7     | 4     | 8     |      |       |     |    |
| Q05816  | Fatty acid-binding protein 5                           | 5.839 | 2.935 | 3.925 | 3.264 | 2.282 | 0.005 | 0.004 | 0.001 | 0.001 | 0.001 | 135  | 1111  | 11  | 73 |
|         |                                                        | 0     | 0     | 0     | 0     | 0     | 2     | 1     | 8     | 5     | 5     |      |       |     |    |
| Q9R1C7  | Pre-mRNA-processing factor 40 homolog A                | 4.366 | 10.19 | 3.877 | 2.865 | 2.483 | 0.059 | 0.000 | 0.028 | 0.033 | 0.049 | 953  | 8     | 3   | 3  |
|         |                                                        | 0     | 00    | 0     | 0     | 0     | 8     | 0     | 7     | 5     | 5     |      |       |     |    |
| Q00612  | Glucose-6-phosphate 1-dehydrogenase X                  | 2.990 | 2.040 | 2.743 | 2.180 | 1.772 | 0.109 | 0.046 | 0.022 | 0.027 | 0.013 | 515  | 1202  | 33  | 64 |
|         |                                                        | 0     | 0     | 0     | 0     | 0     | 7     | 3     | 2     | 3     | 2     |      |       |     |    |
| Q9D9V3  | Ethylmalonyl-CoA decarboxylase                         | 4.364 | 2.142 | 5.556 | 2.671 | 2.626 | 0.036 | 0.105 | 0.000 | 0.007 | 0.001 | 322  | 273   | 13  | 50 |
|         |                                                        | 0     | 0     | 0     | 0     | 0     | 4     | 0     | 2     | 1     | 2     |      |       |     |    |
| Q62264  | Thyroid hormone-inducible hepatic protein              | 4.828 | 1.824 | 4.642 | 4.015 | 2.716 | 0.014 | 0.177 | 0.000 | 0.000 | 0.000 | 150  | 339   | 4   | 27 |
|         |                                                        | 0     | 0     | 0     | 0     | 0     | 0     | 3     | 7     | 1     | 4     |      |       |     |    |
| Q9CZW4  | Long-chain-fatty-acid--CoA ligase 3                    | 5.534 | 3.175 | 4.217 | 3.087 | 3.544 | 0.021 | 0.062 | 0.018 | 0.021 | 0.007 | 720  | 11    | 2   | 6  |
|         |                                                        | 0     | 0     | 0     | 0     | 0     | 6     | 5     | 6     | 0     | 1     |      |       |     |    |
| P30115  | Glutathione S-transferase A3                           | 4.371 | 1.576 | 3.609 | 2.570 | 1.905 | 0.030 | 0.366 | 0.007 | 0.009 | 0.016 | 221  | 494   | 9   | 66 |
|         |                                                        | 0     | 0     | 0     | 0     | 0     | 2     | 7     | 2     | 8     | 8     |      |       |     |    |
| Q8BM A6 | Signal recognition particle subunit SRP68              | 6.697 | 2.472 | 5.177 | 5.080 | 3.820 | 0.007 | 0.183 | 0.004 | 0.002 | 0.002 | 625  | 78    | 6   | 14 |
|         |                                                        | 0     | 0     | 0     | 0     | 0     | 9     | 9     | 3     | 4     | 8     |      |       |     |    |
| Q91WU0  | Carboxylesterase 1F                                    | 4.130 | 1.521 | 3.994 | 3.141 | 2.263 | 0.029 | 0.180 | 0.001 | 0.002 | 0.001 | 561  | 485   | 21  | 55 |
|         |                                                        | 0     | 0     | 0     | 0     | 0     | 5     | 1     | 6     | 3     | 6     |      |       |     |    |
| Q9CQE1  | Protein NipSnap homolog 3B                             | 6.215 | 2.478 | 4.648 | 2.748 | 2.382 | 0.008 | 0.106 | 0.005 | 0.012 | 0.020 | 247  | 141   | 6   | 22 |
|         |                                                        | 0     | 0     | 0     | 0     | 0     | 9     | 3     | 1     | 0     | 0     |      |       |     |    |
| Q8VE K3 | Heterogeneous nuclear ribonucleoprotein U              | 3.309 | 1.976 | 2.560 | 2.171 | 1.601 | 0.084 | 0.111 | 0.033 | 0.022 | 0.027 | 800  | 565   | 23  | 36 |
|         |                                                        | 0     | 0     | 0     | 0     | 0     | 8     | 3     | 4     | 2     | 9     |      |       |     |    |
| Q8CA Y6 | Acetyl-CoA acetyltransferase, cytosolic                | 3.311 | 1.673 | 3.193 | 2.229 | 1.864 | 0.115 | 0.280 | 0.015 | 0.019 | 0.017 | 397  | 518   | 13  | 53 |
|         |                                                        | 0     | 0     | 0     | 0     | 0     | 8     | 0     | 3     | 3     | 9     |      |       |     |    |
| Q3UPL0  | Protein transport protein Sec31A                       | 3.307 | 1.954 | 2.596 | 2.058 | 1.686 | 0.083 | 0.123 | 0.046 | 0.041 | 0.027 | 1230 | 594   | 35  | 39 |
|         |                                                        | 0     | 0     | 0     | 0     | 0     | 7     | 1     | 3     | 5     | 6     |      |       |     |    |
| P35505  | Fumarylacetoacetase                                    | 3.024 | 1.719 | 2.925 | 2.096 | 1.563 | 0.154 | 0.221 | 0.024 | 0.037 | 0.047 | 419  | 572   | 14  | 51 |
|         |                                                        | 0     | 0     | 0     | 0     | 0     | 8     | 7     | 8     | 8     | 8     |      |       |     |    |
| P35385  | Heat shock protein beta-7                              | 4.920 | 2.380 | 2.547 | 2.190 | 2.182 | 0.016 | 0.039 | 0.055 | 0.029 | 0.003 | 169  | 538   | 9   | 76 |
|         |                                                        | 0     | 0     | 0     | 0     | 0     | 4     | 2     | 4     | 2     | 2     |      |       |     |    |
| Q62009  | Periostin                                              | 5.672 | 3.344 | 2.226 | 2.732 | 2.069 | 0.006 | 0.006 | 0.103 | 0.006 | 0.003 | 838  | 1131  | 37  | 64 |
|         |                                                        | 0     | 0     | 0     | 0     | 0     | 1     | 4     | 8     | 4     | 7     |      |       |     |    |
| P08226  | Apolipoprotein E                                       | 4.067 | 3.278 | 2.258 | 2.097 | 1.610 | 0.031 | 0.003 | 0.071 | 0.032 | 0.026 | 311  | 975   | 20  | 64 |
|         |                                                        | 0     | 0     | 0     | 0     | 0     | 6     | 7     | 6     | 2     | 7     |      |       |     |    |



|        |                                 |       |       |       |       |       |       |       |       |       |       |      |      |    |    |
|--------|---------------------------------|-------|-------|-------|-------|-------|-------|-------|-------|-------|-------|------|------|----|----|
| Q3UZ3  | Leucine-rich repeat flightless- | 5.433 | 4.431 | 2.673 | 3.147 | 2.782 | 0.012 | 0.003 | 0.115 | 0.011 | 0.011 | 729  | 10   | 5  | 9  |
| 9      | interacting protein 1           | 0     | 0     | 0     | 0     | 0     | 7     | 2     | 2     | 1     | 5     |      |      |    |    |
| P31996 | Macrosialin                     | 5.113 | 8.736 | 2.235 | 3.003 | 4.402 | 0.020 | 0.000 | 0.253 | 0.017 | 0.000 | 326  | 48   | 3  | 14 |
|        |                                 | 0     | 0     | 0     | 0     | 0     | 6     | 0     | 2     | 5     | 5     |      |      |    |    |
| Q9Z2X  | Heterogeneous nuclear ribonu-   | 4.539 | 2.844 | 2.653 | 2.579 | 1.871 | 0.035 | 0.022 | 0.061 | 0.010 | 0.022 | 415  | 398  | 9  | 40 |
| 1      | cleoprotein F                   | 0     | 0     | 0     | 0     | 0     | 3     | 2     | 2     | 4     | 3     |      |      |    |    |
| Q8BX   | Golgi integral membrane pro-    | 5.738 | 4.182 | 3.036 | 4.430 | 3.091 | 0.017 | 0.014 | 0.106 | 0.004 | 0.010 | 655  | 103  | 2  | 4  |
| A1     | tein 4                          | 0     | 0     | 0     | 0     | 0     | 4     | 9     | 0     | 2     | 6     |      |      |    |    |
| Q6WV   | BTB/POZ domain-containing       | 4.369 | 2.578 | 2.616 | 2.194 | 1.690 | 0.033 | 0.040 | 0.069 | 0.029 | 0.046 | 327  | 350  | 11 | 41 |
| G3     | protein KCTD12                  | 0     | 0     | 0     | 0     | 0     | 3     | 5     | 8     | 9     | 0     |      |      |    |    |
| Q9CQ   | Regulator of G-protein signal-  | 6.590 | 4.317 | 2.963 | 4.396 | 2.983 | 0.008 | 0.012 | 0.104 | 0.003 | 0.015 | 181  | 60   | 3  | 25 |
| E5     | ing 10                          | 0     | 0     | 0     | 0     | 0     | 7     | 2     | 3     | 7     | 1     |      |      |    |    |
| Q9WU   | Coronin-1C                      | 4.270 | 2.410 | 2.392 | 2.571 | 2.015 | 0.034 | 0.041 | 0.082 | 0.011 | 0.009 | 474  | 342  | 15 | 35 |
| M4     |                                 | 0     | 0     | 0     | 0     | 0     | 5     | 0     | 1     | 1     | 2     |      |      |    |    |
| Q9WU   | Cathepsin Z                     | 4.668 | 3.105 | 2.441 | 2.822 | 1.853 | 0.018 | 0.007 | 0.060 | 0.003 | 0.009 | 306  | 450  | 9  | 47 |
| U7     |                                 | 0     | 0     | 0     | 0     | 0     | 7     | 0     | 4     | 4     | 0     |      |      |    |    |
| P97797 | Tyrosine-protein phosphatase    | 4.087 | 2.427 | 2.369 | 2.897 | 2.515 | 0.048 | 0.038 | 0.112 | 0.003 | 0.001 | 513  | 33   | 5  | 10 |
|        | non-receptor type substrate 1   | 0     | 0     | 0     | 0     | 0     | 0     | 0     | 6     | 0     | 4     |      |      |    |    |
| Q569Z  | Thyroid hormone receptor-as-    | 3.917 | 3.511 | 2.934 | 3.718 | 2.596 | 0.075 | 0.018 | 0.063 | 0.001 | 0.011 | 951  | 71   | 9  | 11 |
| 6      | sociated protein 3              | 0     | 0     | 0     | 0     | 0     | 6     | 3     | 6     | 6     | 4     |      |      |    |    |
| Q5F2E  | Nuclear fragile X mental retar- | 4.344 | 3.461 | 3.084 | 8.687 | 4.810 | 0.070 | 0.040 | 0.094 | 0.000 | 0.000 | 692  | 41   | 2  | 3  |
| 7      | dation-interacting protein 2    | 0     | 0     | 0     | 0     | 0     | 6     | 4     | 6     | 0     | 8     |      |      |    |    |
| Q9Z0J  | NPC intracellular cholesterol   | 3.595 | 2.674 | 2.545 | 1.994 | 1.645 | 0.079 | 0.027 | 0.067 | 0.047 | 0.048 | 149  | 205  | 8  | 54 |
| 0      | transporter 2                   | 0     | 0     | 0     | 0     | 0     | 4     | 5     | 8     | 6     | 6     |      |      |    |    |
| Q99PL  | Ribosome-binding protein 1      | 3.830 | 1.852 | 2.304 | 2.290 | 1.619 | 0.041 | 0.072 | 0.059 | 0.015 | 0.025 | 1605 | 1686 | 48 | 34 |
| 5      |                                 | 0     | 0     | 0     | 0     | 0     | 2     | 2     | 6     | 5     | 7     |      |      |    |    |
| Q6231  | Trans-Golgi network integral    | 4.874 | 2.710 | 3.508 | 3.480 | 2.562 | 0.039 | 0.138 | 0.055 | 0.018 | 0.035 | 353  | 27   | 2  | 6  |
| 3      | membrane protein 1              | 0     | 0     | 0     | 0     | 0     | 9     | 4     | 6     | 6     | 9     |      |      |    |    |
| Q9EQ   | Protein SET                     | 4.181 | 2.166 | 2.603 | 2.194 | 1.760 | 0.040 | 0.070 | 0.051 | 0.020 | 0.032 | 289  | 396  | 10 | 43 |
| U5     |                                 | 0     | 0     | 0     | 0     | 0     | 7     | 1     | 2     | 5     | 3     |      |      |    |    |
| Q6444  | C-type mannose receptor 2       | 4.093 | 1.766 | 2.243 | 2.799 | 1.804 | 0.036 | 0.123 | 0.068 | 0.005 | 0.011 | 1479 | 463  | 23 | 21 |
| 9      |                                 | 0     | 0     | 0     | 0     | 0     | 1     | 8     | 6     | 0     | 5     |      |      |    |    |
| Q921F  | TAR DNA-binding protein 43      | 2.935 | 1.967 | 2.109 | 2.066 | 1.588 | 0.153 | 0.126 | 0.134 | 0.026 | 0.030 | 414  | 615  | 14 | 50 |
| 2      |                                 | 0     | 0     | 0     | 0     | 0     | 8     | 5     | 6     | 5     | 2     |      |      |    |    |
| Q91ZX  | Prolow-density lipoprotein re-  | 3.139 | 1.852 | 2.290 | 2.064 | 1.630 | 0.091 | 0.097 | 0.061 | 0.040 | 0.024 | 4545 | 1237 | 76 | 20 |
| 7      | ceptor-related protein 1        | 0     | 0     | 0     | 0     | 0     | 7     | 0     | 6     | 8     | 5     |      |      |    |    |
| Q9CY   | Tumor protein D54               | 2.748 | 1.795 | 2.089 | 2.215 | 1.608 | 0.228 | 0.185 | 0.152 | 0.029 | 0.049 | 220  | 429  | 12 | 51 |
| Z2     |                                 | 0     | 0     | 0     | 0     | 0     | 2     | 4     | 6     | 5     | 3     |      |      |    |    |
| Q9D0J  | Parathymosin                    | 3.189 | 1.759 | 2.210 | 2.665 | 1.604 | 0.117 | 0.197 | 0.107 | 0.006 | 0.027 | 101  | 161  | 5  | 24 |
| 8      |                                 | 0     | 0     | 0     | 0     | 0     | 1     | 3     | 2     | 6     | 1     |      |      |    |    |
| Q0579  | Basement membrane-specific      | 3.647 | 1.983 | 2.369 | 2.023 | 1.747 | 0.050 | 0.050 | 0.051 | 0.031 | 0.014 | 3707 | 3595 | 94 | 38 |
| 3      | heparan sulfate proteoglycan    | 0     | 0     | 0     | 0     | 0     | 6     | 4     | 4     | 0     | 7     |      |      |    |    |
|        | core protein                    |       |       |       |       |       |       |       |       |       |       |      |      |    |    |
| Q6431  | Hematopoietic progenitor cell   | 3.151 | 1.962 | 2.135 | 2.454 | 1.738 | 0.161 | 0.165 | 0.205 | 0.013 | 0.040 | 382  | 226  | 7  | 17 |
| 4      | antigen CD34                    | 0     | 0     | 0     | 0     | 0     | 5     | 1     | 7     | 3     | 1     |      |      |    |    |
| Q9QY   | Alpha-adducin                   | 3.144 | 1.849 | 2.724 | 2.183 | 1.942 | 0.178 | 0.238 | 0.079 | 0.025 | 0.028 | 735  | 217  | 13 | 27 |
| C0     |                                 | 0     | 0     | 0     | 0     | 0     | 3     | 8     | 7     | 7     | 9     |      |      |    |    |
| Q8BJ7  | Nuclear pore complex protein    | 3.176 | 1.677 | 2.372 | 2.716 | 1.972 | 0.169 | 0.385 | 0.138 | 0.007 | 0.032 | 819  | 22   | 5  | 7  |
| 1      | Nup93                           | 0     | 0     | 0     | 0     | 0     | 5     | 1     | 5     | 2     | 8     |      |      |    |    |
| B2RXS  | Plexin-B2                       | 3.567 | 2.919 | 3.167 | 2.764 | 2.329 | 0.105 | 0.062 | 0.059 | 0.030 | 0.041 | 1842 | 19   | 6  | 5  |
| 4      |                                 | 0     | 0     | 0     | 0     | 0     | 7     | 8     | 4     | 9     | 4     |      |      |    |    |
| Q99M   | Protein ATP1B4                  | 4.060 | 2.405 | 2.013 | 2.480 | 2.063 | 0.061 | 0.113 | 0.332 | 0.047 | 0.047 | 356  | 78   | 4  | 13 |
| E6     |                                 | 0     | 0     | 0     | 0     | 0     | 8     | 1     | 0     | 1     | 7     |      |      |    |    |
| Q8C65  | Septin-10                       | 2.997 | 1.853 | 2.519 | 3.590 | 2.754 | 0.249 | 0.439 | 0.174 | 0.015 | 0.016 | 452  | 60   | 2  | 6  |
| 0      |                                 | 0     | 0     | 0     | 0     | 0     | 7     | 2     | 3     | 3     | 8     |      |      |    |    |
| Q9R05  | Four and a half LIM domains     | 2.475 | 2.276 | 2.646 | 2.583 | 2.233 | 0.352 | 0.071 | 0.065 | 0.008 | 0.004 | 289  | 305  | 12 | 46 |
| 9      | protein 3                       | 0     | 0     | 0     | 0     | 0     | 7     | 8     | 4     | 8     | 3     |      |      |    |    |

|            |                                                           |       |       |       |       |       |       |       |       |       |       |      |      |     |    |
|------------|-----------------------------------------------------------|-------|-------|-------|-------|-------|-------|-------|-------|-------|-------|------|------|-----|----|
| Q6109<br>3 | Cytochrome b-245 heavy chain                              | 3.044 | 2.397 | 2.115 | 3.429 | 2.255 | 0.197 | 0.114 | 0.280 | 0.003 | 0.038 | 570  | 45   | 14  | 44 |
|            |                                                           | 0     | 0     | 0     | 0     | 0     | 7     | 9     | 2     | 1     | 9     |      |      |     |    |
| Q8CI9<br>5 | Oxysterol-binding protein-related protein 11              | 3.197 | 2.603 | 3.363 | 3.055 | 2.527 | 0.188 | 0.152 | 0.067 | 0.040 | 0.033 | 751  | 24   | 5   | 10 |
|            |                                                           | 0     | 0     | 0     | 0     | 0     | 4     | 4     | 0     | 3     | 6     |      |      |     |    |
| Q9CQ<br>W9 | Interferon-induced transmembrane protein 3                | 4.677 | 3.160 | 3.706 | 2.152 | 2.754 | 0.036 | 0.032 | 0.013 | 0.052 | 0.003 | 137  | 105  | 2   | 20 |
|            |                                                           | 0     | 0     | 0     | 0     | 0     | 8     | 1     | 7     | 1     | 4     |      |      |     |    |
| A6H5X<br>4 | PHD finger protein 11                                     | 9.915 | 31.49 | 6.780 | 2.215 | 4.556 | 0.001 | 0.000 | 0.001 | 0.099 | 0.003 | 337  | 13   | 2   | 12 |
|            |                                                           | 0     | 40    | 0     | 0     | 0     | 5     | 0     | 6     | 2     | 9     |      |      |     |    |
| P08207     | Protein S100-A10                                          | 4.083 | 2.684 | 3.288 | 1.620 | 1.645 | 0.056 | 0.025 | 0.014 | 0.154 | 0.043 | 97   | 250  | 5   | 71 |
|            |                                                           | 0     | 0     | 0     | 0     | 0     | 5     | 7     | 4     | 2     | 7     |      |      |     |    |
| Q9Z1F<br>9 | SUMO-activating enzyme subunit 2                          | 3.285 | 2.536 | 3.053 | 1.791 | 1.557 | 0.087 | 0.031 | 0.016 | 0.083 | 0.033 | 638  | 162  | 12  | 29 |
|            |                                                           | 0     | 0     | 0     | 0     | 0     | 2     | 2     | 0     | 2     | 7     |      |      |     |    |
| Q8R0X<br>7 | Sphingosine-1-phosphate lyase 1                           | 5.231 | 2.718 | 3.345 | 1.894 | 2.212 | 0.024 | 0.066 | 0.039 | 0.162 | 0.044 | 568  | 41   | 3   | 6  |
|            |                                                           | 0     | 0     | 0     | 0     | 0     | 6     | 2     | 2     | 5     | 2     |      |      |     |    |
| Q8K4G<br>1 | Latent-transforming growth factor beta-binding protein 4  | 4.702 | 2.757 | 3.490 | 2.422 | 2.047 | 0.039 | 0.075 | 0.030 | 0.061 | 0.049 | 1666 | 73   | 7   | 5  |
|            |                                                           | 0     | 0     | 0     | 0     | 0     | 7     | 2     | 6     | 3     | 1     |      |      |     |    |
| Q9CZ<br>N7 | Serine hydroxymethyltransferase, mitochondrial            | 4.319 | 2.753 | 4.057 | 2.228 | 3.148 | 0.053 | 0.077 | 0.010 | 0.088 | 0.002 | 504  | 70   | 7   | 23 |
|            |                                                           | 0     | 0     | 0     | 0     | 0     | 5     | 7     | 1     | 2     | 9     |      |      |     |    |
| P97927     | Laminin subunit alpha-4                                   | 2.981 | 1.743 | 2.505 | 1.877 | 1.627 | 0.110 | 0.097 | 0.037 | 0.062 | 0.024 | 1816 | 631  | 32  | 23 |
|            |                                                           | 0     | 0     | 0     | 0     | 0     | 9     | 5     | 8     | 0     | 8     |      |      |     |    |
| Q8JZU<br>2 | Tricarboxylate transport protein, mitochondrial           | 3.183 | 1.697 | 3.754 | 1.843 | 2.127 | 0.129 | 0.236 | 0.005 | 0.068 | 0.002 | 311  | 345  | 15  | 55 |
|            |                                                           | 0     | 0     | 0     | 0     | 0     | 3     | 5     | 0     | 8     | 9     |      |      |     |    |
| Q9D2R<br>0 | Acetoacetyl-CoA synthetase                                | 2.673 | 1.548 | 3.195 | 1.553 | 1.827 | 0.286 | 0.441 | 0.017 | 0.183 | 0.026 | 672  | 247  | 20  | 43 |
|            |                                                           | 0     | 0     | 0     | 0     | 0     | 3     | 5     | 2     | 8     | 3     |      |      |     |    |
| Q6209<br>3 | Serine/arginine-rich splicing factor 2                    | 3.647 | 2.101 | 3.981 | 1.625 | 2.192 | 0.082 | 0.177 | 0.006 | 0.207 | 0.014 | 221  | 152  | 6   | 22 |
|            |                                                           | 0     | 0     | 0     | 0     | 0     | 9     | 6     | 1     | 7     | 4     |      |      |     |    |
| P54310     | Hormone-sensitive lipase                                  | 3.679 | 1.903 | 4.422 | 1.927 | 2.191 | 0.068 | 0.120 | 0.000 | 0.058 | 0.002 | 759  | 695  | 30  | 63 |
|            |                                                           | 0     | 0     | 0     | 0     | 0     | 5     | 8     | 7     | 3     | 2     |      |      |     |    |
| P33267     | Cytochrome P450 2F2                                       | 3.544 | 1.691 | 3.030 | 1.899 | 1.808 | 0.082 | 0.304 | 0.032 | 0.069 | 0.027 | 491  | 396  | 22  | 53 |
|            |                                                           | 0     | 0     | 0     | 0     | 0     | 7     | 7     | 0     | 5     | 0     |      |      |     |    |
| O7050<br>3 | Very-long-chain 3-oxoacyl-CoA reductase                   | 4.418 | 2.674 | 3.648 | 2.302 | 2.479 | 0.052 | 0.070 | 0.020 | 0.061 | 0.016 | 312  | 95   | 7   | 29 |
|            |                                                           | 0     | 0     | 0     | 0     | 0     | 7     | 0     | 5     | 9     | 7     |      |      |     |    |
| Q6P06<br>9 | Sorcin                                                    | 3.058 | 2.200 | 2.678 | 1.940 | 1.693 | 0.148 | 0.064 | 0.043 | 0.056 | 0.030 | 198  | 379  | 10  | 46 |
|            |                                                           | 0     | 0     | 0     | 0     | 0     | 7     | 6     | 8     | 2     | 4     |      |      |     |    |
| Q99JR<br>1 | Sideroflexin-1                                            | 3.351 | 2.398 | 3.559 | 1.502 | 2.222 | 0.129 | 0.174 | 0.023 | 0.372 | 0.041 | 322  | 73   | 7   | 41 |
|            |                                                           | 0     | 0     | 0     | 0     | 0     | 1     | 8     | 4     | 6     | 3     |      |      |     |    |
| Q5SW<br>U9 | Acetyl-CoA carboxylase 1                                  | 3.148 | 1.802 | 3.680 | 1.627 | 1.846 | 0.090 | 0.082 | 0.003 | 0.089 | 0.009 | 2345 | 2783 | 101 | 66 |
|            |                                                           | 0     | 0     | 0     | 0     | 0     | 7     | 9     | 0     | 8     | 6     |      |      |     |    |
| Q5EB<br>G6 | Heat shock protein beta-6                                 | 3.026 | 1.761 | 2.788 | 1.864 | 1.902 | 0.113 | 0.192 | 0.020 | 0.062 | 0.007 | 162  | 597  | 8   | 71 |
|            |                                                           | 0     | 0     | 0     | 0     | 0     | 5     | 2     | 1     | 3     | 5     |      |      |     |    |
| Q9ET0<br>1 | Glycogen phosphorylase, liver form                        | 2.764 | 1.794 | 2.811 | 1.631 | 1.705 | 0.144 | 0.084 | 0.019 | 0.088 | 0.017 | 850  | 3782 | 32  | 61 |
|            |                                                           | 0     | 0     | 0     | 0     | 0     | 6     | 8     | 1     | 9     | 7     |      |      |     |    |
| P51881     | ADP/ATP translocase 2                                     | 3.128 | 1.704 | 2.721 | 1.635 | 1.584 | 0.092 | 0.108 | 0.023 | 0.087 | 0.030 | 298  | 4970 | 13  | 74 |
|            |                                                           | 0     | 0     | 0     | 0     | 0     | 9     | 7     | 3     | 8     | 0     |      |      |     |    |
| Q8BT<br>M8 | Filamin-A                                                 | 3.681 | 2.059 | 2.187 | 1.711 | 1.843 | 0.048 | 0.041 | 0.077 | 0.071 | 0.009 | 2647 | 3788 | 119 | 65 |
|            |                                                           | 0     | 0     | 0     | 0     | 0     | 7     | 0     | 8     | 5     | 7     |      |      |     |    |
| P16675     | Lysosomal protective protein                              | 4.023 | 2.771 | 2.420 | 1.821 | 1.793 | 0.053 | 0.017 | 0.081 | 0.086 | 0.026 | 474  | 503  | 10  | 25 |
|            |                                                           | 0     | 0     | 0     | 0     | 0     | 0     | 5     | 6     | 4     | 9     |      |      |     |    |
| Q9Z1X<br>4 | Interleukin enhancer-binding factor 3                     | 2.899 | 2.559 | 2.554 | 1.911 | 1.713 | 0.172 | 0.024 | 0.056 | 0.071 | 0.024 | 898  | 291  | 18  | 28 |
|            |                                                           | 0     | 0     | 0     | 0     | 0     | 9     | 9     | 1     | 8     | 1     |      |      |     |    |
| P42227     | Signal transducer and activator of transcription 3        | 3.713 | 3.059 | 2.610 | 1.667 | 2.457 | 0.094 | 0.046 | 0.127 | 0.268 | 0.024 | 770  | 112  | 8   | 19 |
|            |                                                           | 0     | 0     | 0     | 0     | 0     | 4     | 3     | 4     | 2     | 7     |      |      |     |    |
| O8910<br>3 | Complement component C1q receptor                         | 3.414 | 2.537 | 2.585 | 1.900 | 1.920 | 0.118 | 0.041 | 0.082 | 0.072 | 0.025 | 644  | 264  | 9   | 19 |
|            |                                                           | 0     | 0     | 0     | 0     | 0     | 7     | 5     | 0     | 4     | 1     |      |      |     |    |
| Q6Q89<br>9 | Probable ATP-dependent RNA helicase DDX58                 | 4.954 | 2.425 | 3.281 | 2.521 | 2.494 | 0.025 | 0.187 | 0.063 | 0.060 | 0.027 | 926  | 114  | 10  | 13 |
|            |                                                           | 0     | 0     | 0     | 0     | 0     | 2     | 3     | 4     | 4     | 9     |      |      |     |    |
| Q6NV<br>F9 | Cleavage and polyadenylation specificity factor subunit 6 | 4.244 | 2.657 | 2.800 | 2.306 | 2.227 | 0.045 | 0.107 | 0.095 | 0.070 | 0.042 | 551  | 124  | 5   | 14 |
|            |                                                           | 0     | 0     | 0     | 0     | 0     | 7     | 1     | 6     | 6     | 0     |      |      |     |    |

|         |                                                               |       |       |       |       |       |       |       |       |       |       |      |      |     |    |
|---------|---------------------------------------------------------------|-------|-------|-------|-------|-------|-------|-------|-------|-------|-------|------|------|-----|----|
| P01900  | H-2 class I histocompatibility antigen, D-D alpha chain       | 3.982 | 1.595 | 1.857 | 1.668 | 1.764 | 0.047 | 0.297 | 0.228 | 0.109 | 0.013 | 365  | 401  | 12  | 55 |
|         |                                                               | 0     | 0     | 0     | 0     | 0     | 4     | 4     | 9     | 9     | 2     |      |      |     |    |
| P01902  | H-2 class I histocompatibility antigen, K-D alpha chain       | 3.529 | 2.332 | 2.681 | 1.731 | 1.739 | 0.089 | 0.058 | 0.056 | 0.111 | 0.032 | 368  | 345  | 16  | 48 |
|         |                                                               | 0     | 0     | 0     | 0     | 0     | 1     | 3     | 3     | 4     | 8     |      |      |     |    |
| P16546  | Spectrin alpha chain, non-erythrocytic 1                      | 2.935 | 1.731 | 2.020 | 1.778 | 1.534 | 0.117 | 0.100 | 0.114 | 0.059 | 0.037 | 2472 | 4234 | 141 | 64 |
|         |                                                               | 0     | 0     | 0     | 0     | 0     | 3     | 8     | 4     | 6     | 3     |      |      |     |    |
| P61750  | ADP-ribosylation factor 4                                     | 4.055 | 1.526 | 2.465 | 1.832 | 1.822 | 0.059 | 0.500 | 0.099 | 0.081 | 0.042 | 180  | 498  | 5   | 83 |
|         |                                                               | 0     | 0     | 0     | 0     | 0     | 0     | 9     | 1     | 2     | 8     |      |      |     |    |
| Q9JIF0  | Protein arginine N-methyltransferase 1                        | 2.665 | 1.897 | 2.153 | 1.737 | 1.670 | 0.264 | 0.151 | 0.142 | 0.084 | 0.036 | 371  | 500  | 14  | 41 |
|         |                                                               | 0     | 0     | 0     | 0     | 0     | 2     | 1     | 5     | 3     | 1     |      |      |     |    |
| Q640N1  | Adipocyte enhancer-binding protein 1                          | 4.647 | 7.535 | 3.394 | 2.601 | 1.861 | 0.041 | 0.000 | 0.043 | 0.039 | 0.103 | 1128 | 63   | 8   | 9  |
|         |                                                               | 0     | 0     | 0     | 0     | 0     | 0     | 0     | 2     | 3     | 3     |      |      |     |    |
| Q80VQ0  | Aldehyde dehydrogenase family 3 member B1                     | 4.793 | 3.198 | 4.118 | 2.415 | 1.596 | 0.024 | 0.008 | 0.004 | 0.014 | 0.094 | 468  | 104  | 4   | 35 |
|         |                                                               | 0     | 0     | 0     | 0     | 0     | 8     | 6     | 4     | 7     | 1     |      |      |     |    |
| P31324  | cAMP-dependent protein kinase type II-beta regulatory subunit | 2.891 | 2.281 | 2.992 | 2.238 | 1.583 | 0.254 | 0.157 | 0.046 | 0.044 | 0.145 | 416  | 314  | 7   | 26 |
|         |                                                               | 0     | 0     | 0     | 0     | 0     | 0     | 8     | 6     | 3     | 1     |      |      |     |    |
| Q922Q8  | Leucine-rich repeat-containing protein 59                     | 4.791 | 3.532 | 2.470 | 2.591 | 1.881 | 0.021 | 0.014 | 0.133 | 0.009 | 0.072 | 307  | 183  | 9   | 32 |
|         |                                                               | 0     | 0     | 0     | 0     | 0     | 8     | 4     | 4     | 9     | 3     |      |      |     |    |
| P52840  | Sulfotransferase 1A1                                          | 5.702 | 2.988 | 2.683 | 2.458 | 1.578 | 0.006 | 0.014 | 0.060 | 0.013 | 0.074 | 291  | 8    | 2   | 12 |
|         |                                                               | 0     | 0     | 0     | 0     | 0     | 9     | 2     | 3     | 9     | 2     |      |      |     |    |
| Q91XV3  | Brain acid soluble protein 1                                  | 5.494 | 3.073 | 2.668 | 2.940 | 1.698 | 0.009 | 0.023 | 0.080 | 0.005 | 0.066 | 226  | 230  | 6   | 39 |
|         |                                                               | 0     | 0     | 0     | 0     | 0     | 4     | 5     | 5     | 5     | 6     |      |      |     |    |
| P21995  | Embiggin                                                      | 4.060 | 4.500 | 2.774 | 3.341 | 1.956 | 0.070 | 0.008 | 0.115 | 0.010 | 0.107 | 330  | 17   | 3   | 9  |
|         |                                                               | 0     | 0     | 0     | 0     | 0     | 3     | 8     | 1     | 2     | 3     |      |      |     |    |
| Q8BPU7  | Engulfment and cell motility protein 1                        | 3.414 | 6.882 | 2.692 | 3.713 | 2.213 | 0.147 | 0.000 | 0.135 | 0.007 | 0.076 | 727  | 5    | 2   | 3  |
|         |                                                               | 0     | 0     | 0     | 0     | 0     | 6     | 7     | 4     | 0     | 2     |      |      |     |    |
| Q8BH C4 | Dephospho-CoA kinase domain-containing protein                | 2.353 | 3.744 | 2.366 | 3.187 | 1.733 | 0.422 | 0.025 | 0.217 | 0.023 | 0.167 | 231  | 12   | 3   | 25 |
|         |                                                               | 0     | 0     | 0     | 0     | 0     | 3     | 3     | 4     | 5     | 1     |      |      |     |    |
| Q62318  | Transcription intermediary factor 1-beta                      | 3.616 | 2.973 | 2.057 | 2.751 | 1.787 | 0.114 | 0.044 | 0.291 | 0.024 | 0.104 | 834  | 86   | 7   | 16 |
|         |                                                               | 0     | 0     | 0     | 0     | 0     | 2     | 0     | 1     | 3     | 7     |      |      |     |    |
| Q9JJU8  | SH3 domain-binding glutamic acid-rich-like protein            | 3.617 | 2.539 | 1.906 | 2.292 | 1.628 | 0.098 | 0.042 | 0.280 | 0.024 | 0.064 | 114  | 150  | 7   | 79 |
|         |                                                               | 0     | 0     | 0     | 0     | 0     | 4     | 7     | 0     | 2     | 1     |      |      |     |    |
| P70429  | Ena/VASP-like protein                                         | 6.311 | 3.002 | 2.736 | 3.752 | 2.207 | 0.012 | 0.080 | 0.142 | 0.010 | 0.071 | 414  | 49   | 6   | 16 |
|         |                                                               | 0     | 0     | 0     | 0     | 0     | 8     | 6     | 5     | 2     | 3     |      |      |     |    |
| Q9D8S3  | ADP-ribosylation factor GTPase-activating protein 3           | 3.566 | 2.472 | 2.502 | 2.985 | 2.124 | 0.146 | 0.180 | 0.203 | 0.030 | 0.075 | 523  | 17   | 2   | 7  |
|         |                                                               | 0     | 0     | 0     | 0     | 0     | 9     | 3     | 9     | 4     | 1     |      |      |     |    |
| Q8R464  | Cell adhesion molecule 4                                      | 3.365 | 1.871 | 2.284 | 2.711 | 1.528 | 0.169 | 0.377 | 0.242 | 0.034 | 0.254 | 388  | 7    | 2   | 6  |
|         |                                                               | 0     | 0     | 0     | 0     | 0     | 3     | 0     | 2     | 7     | 7     |      |      |     |    |
| P70313  | Nitric oxide synthase, endothelial                            | 3.163 | 1.892 | 2.718 | 2.662 | 1.659 | 0.162 | 0.182 | 0.059 | 0.007 | 0.065 | 1202 | 9    | 2   | 1  |
|         |                                                               | 0     | 0     | 0     | 0     | 0     | 8     | 8     | 3     | 7     | 3     |      |      |     |    |
| Q9DBE0  | Cysteine sulfinic acid decarboxylase                          | 3.143 | 1.659 | 2.637 | 2.710 | 1.699 | 0.178 | 0.380 | 0.074 | 0.006 | 0.050 | 493  | 289  | 15  | 48 |
|         |                                                               | 0     | 0     | 0     | 0     | 0     | 1     | 8     | 9     | 1     | 7     |      |      |     |    |
| P33434  | 72 kDa type IV collagenase                                    | 4.231 | 2.812 | 2.705 | 2.860 | 1.743 | 0.058 | 0.115 | 0.127 | 0.026 | 0.148 | 662  | 52   | 7   | 15 |
|         |                                                               | 0     | 0     | 0     | 0     | 0     | 7     | 6     | 1     | 6     | 3     |      |      |     |    |
| O08738  | Caspase-6                                                     | 3.588 | 2.569 | 2.523 | 2.938 | 2.226 | 0.131 | 0.155 | 0.199 | 0.045 | 0.069 | 276  | 27   | 5   | 15 |
|         |                                                               | 0     | 0     | 0     | 0     | 0     | 5     | 8     | 6     | 3     | 6     |      |      |     |    |
| P02798  | Metallothionein-2                                             | 3.511 | 2.251 | 2.743 | 3.078 | 2.232 | 0.143 | 0.251 | 0.121 | 0.018 | 0.050 | 61   | 56   | 2   | 33 |
|         |                                                               | 0     | 0     | 0     | 0     | 0     | 1     | 7     | 8     | 7     | 2     |      |      |     |    |
| Q9QZD8  | Mitochondrial dicarboxylate carrier                           | 3.054 | 2.607 | 2.056 | 2.173 | 1.551 | 0.211 | 0.067 | 0.213 | 0.045 | 0.105 | 287  | 162  | 9   | 47 |
|         |                                                               | 0     | 0     | 0     | 0     | 0     | 2     | 3     | 7     | 0     | 5     |      |      |     |    |
| Q6ZPZ3  | Zinc finger CCCH domain-containing protein 4                  | 2.547 | 2.694 | 2.037 | 2.547 | 1.536 | 0.351 | 0.125 | 0.338 | 0.046 | 0.284 | 1304 | 21   | 2   | 3  |
|         |                                                               | 0     | 0     | 0     | 0     | 0     | 0     | 8     | 3     | 1     | 5     |      |      |     |    |
| Q9Z1Q5  | Chloride intracellular channel protein 1                      | 3.514 | 2.108 | 2.348 | 2.014 | 1.576 | 0.080 | 0.084 | 0.087 | 0.049 | 0.050 | 241  | 446  | 16  | 80 |
|         |                                                               | 0     | 0     | 0     | 0     | 0     | 3     | 3     | 2     | 5     | 4     |      |      |     |    |
| Q61545  | RNA-binding protein EWS                                       | 3.336 | 2.372 | 2.740 | 2.206 | 1.712 | 0.139 | 0.073 | 0.070 | 0.029 | 0.082 | 655  | 143  | 4   | 8  |
|         |                                                               | 0     | 0     | 0     | 0     | 0     | 6     | 9     | 1     | 6     | 2     |      |      |     |    |

|        |                                                                   |       |       |       |       |       |       |       |       |       |       |     |      |    |    |
|--------|-------------------------------------------------------------------|-------|-------|-------|-------|-------|-------|-------|-------|-------|-------|-----|------|----|----|
| O8879  | Junctional adhesion molecule 2                                    | 3.395 | 3.079 | 2.761 | 2.865 | 2.214 | 0.166 | 0.074 | 0.138 | 0.046 | 0.066 | 300 | 30   | 2  | 3  |
|        | A                                                                 | 0     | 0     | 0     | 0     | 0     | 6     | 4     | 2     | 1     | 6     |     |      |    |    |
| Q6158  | Insulin-like growth factor-binding protein 7                      | 5.682 | 4.697 | 5.210 | 2.432 | 1.982 | 0.017 | 0.007 | 0.004 | 0.088 | 0.103 | 281 | 46   | 3  | 19 |
|        |                                                                   | 0     | 0     | 0     | 0     | 0     | 7     | 9     | 5     | 7     | 8     |     |      |    |    |
| P29416 | Beta-hexosaminidase subunit alpha                                 | 4.538 | 2.876 | 5.529 | 2.049 | 1.803 | 0.037 | 0.079 | 0.002 | 0.125 | 0.150 | 528 | 113  | 10 | 27 |
|        |                                                                   | 0     | 0     | 0     | 0     | 0     | 6     | 9     | 0     | 4     | 5     |     |      |    |    |
| Q9WV80 | Sorting nexin-1                                                   | 3.159 | 2.636 | 3.270 | 1.609 | 1.935 | 0.194 | 0.081 | 0.029 | 0.269 | 0.061 | 522 | 99   | 7  | 16 |
|        |                                                                   | 0     | 0     | 0     | 0     | 0     | 4     | 2     | 6     | 1     | 0     |     |      |    |    |
| Q91VS7 | Microsomal glutathione S-transferase 1                            | 3.269 | 1.918 | 2.986 | 1.542 | 1.612 | 0.130 | 0.166 | 0.035 | 0.182 | 0.062 | 155 | 141  | 8  | 66 |
|        |                                                                   | 0     | 0     | 0     | 0     | 0     | 2     | 9     | 1     | 7     | 0     |     |      |    |    |
| Q8R5A0 | N-lysine methyltransferase SMYD2                                  | 1.977 | 1.855 | 3.275 | 2.087 | 1.580 | 0.669 | 0.314 | 0.035 | 0.101 | 0.200 | 433 | 77   | 6  | 14 |
|        |                                                                   | 0     | 0     | 0     | 0     | 0     | 9     | 1     | 3     | 0     | 9     |     |      |    |    |
| Q9CXR1 | Dehydrogenase/reductase SDR family member 7                       | 3.134 | 2.218 | 3.846 | 1.663 | 1.559 | 0.174 | 0.173 | 0.010 | 0.228 | 0.127 | 338 | 119  | 10 | 39 |
|        |                                                                   | 0     | 0     | 0     | 0     | 0     | 4     | 9     | 6     | 3     | 2     |     |      |    |    |
| Q9R0Q9 | Mannose-P-dolichol utilization defect 1 protein                   | 3.678 | 2.221 | 3.358 | 1.932 | 1.675 | 0.094 | 0.255 | 0.044 | 0.175 | 0.183 | 247 | 38   | 3  | 14 |
|        |                                                                   | 0     | 0     | 0     | 0     | 0     | 3     | 1     | 9     | 3     | 9     |     |      |    |    |
| Q9DBL7 | Bifunctional coenzyme A synthase                                  | 2.667 | 2.055 | 2.982 | 2.031 | 1.694 | 0.307 | 0.189 | 0.047 | 0.071 | 0.111 | 563 | 48   | 6  | 19 |
|        |                                                                   | 0     | 0     | 0     | 0     | 0     | 1     | 3     | 7     | 5     | 9     |     |      |    |    |
| D3Z6Q9 | Bridging integrator 2                                             | 11.16 | 3.941 | 2.653 |       | 1.754 | 0.000 | 0.021 | 0.157 |       | 0.221 | 489 | 155  | 2  | 7  |
|        |                                                                   | 10    | 0     | 0     |       | 0     | 7     | 3     | 2     |       | 0     |     |      |    |    |
| P01921 | H-2 class II histocompatibility antigen, A-D beta chain           | 4.999 | 3.696 | 2.230 | 2.341 | 1.847 | 0.023 | 0.012 | 0.243 | 0.059 | 0.086 | 265 | 154  | 9  | 41 |
|        |                                                                   | 0     | 0     | 0     | 0     | 0     | 7     | 5     | 9     | 9     | 4     |     |      |    |    |
| Q60766 | Immunity-related GTPase family M protein 1                        | 4.544 | 3.632 | 3.069 | 1.889 | 1.691 | 0.041 | 0.016 | 0.050 | 0.123 | 0.131 | 409 | 69   | 10 | 25 |
|        |                                                                   | 0     | 0     | 0     | 0     | 0     | 5     | 2     | 7     | 4     | 1     |     |      |    |    |
| Q9CXY6 | Interleukin enhancer-binding factor 2                             | 3.851 | 2.992 | 2.528 | 1.865 | 1.671 | 0.077 | 0.030 | 0.107 | 0.094 | 0.107 | 390 | 146  | 10 | 33 |
|        |                                                                   | 0     | 0     | 0     | 0     | 0     | 0     | 3     | 1     | 4     | 5     |     |      |    |    |
| P61290 | Proteasome activator complex subunit 3                            | 4.165 | 2.917 | 2.316 | 2.207 | 1.789 | 0.050 | 0.049 | 0.227 | 0.086 | 0.132 | 254 | 75   | 5  | 23 |
|        |                                                                   | 0     | 0     | 0     | 0     | 0     | 4     | 9     | 4     | 4     | 9     |     |      |    |    |
| P01915 | H-2 class II histocompatibility antigen, E-D beta chain           | 2.411 | 4.625 | 2.590 | 1.664 | 1.542 | 0.443 | 0.009 | 0.156 | 0.315 | 0.248 | 264 | 19   | 6  | 27 |
|        |                                                                   | 0     | 0     | 0     | 0     | 0     | 0     | 2     | 6     | 6     | 8     |     |      |    |    |
| P47964 | 60S ribosomal protein L36                                         | 3.386 | 3.961 | 2.430 | 1.845 | 1.672 | 0.130 | 0.010 | 0.169 | 0.220 | 0.172 | 105 | 24   | 3  | 21 |
|        |                                                                   | 0     | 0     | 0     | 0     | 0     | 8     | 9     | 8     | 7     | 5     |     |      |    |    |
| P50543 | Protein S100-A11                                                  | 3.772 | 1.765 | 2.946 | 2.070 | 1.471 | 0.061 | 0.192 | 0.021 | 0.036 | 0.048 | 98  | 417  | 6  | 72 |
|        |                                                                   | 0     | 0     | 0     | 0     | 0     | 9     | 4     | 6     | 7     | 6     |     |      |    |    |
| Q8BG05 | Heterogeneous nuclear ribonucleoprotein A3                        | 3.345 | 2.222 | 1.996 | 1.882 | 1.494 | 0.071 | 0.026 | 0.120 | 0.045 | 0.044 | 379 | 1463 | 19 | 48 |
|        |                                                                   | 0     | 0     | 0     | 0     | 0     | 8     | 4     | 9     | 0     | 5     |     |      |    |    |
| Q9WUM3 | Coronin-1B                                                        | 3.515 | 1.911 | 2.042 | 2.087 | 1.494 | 0.058 | 0.097 | 0.108 | 0.041 | 0.044 | 484 | 388  | 15 | 41 |
|        |                                                                   | 0     | 0     | 0     | 0     | 0     | 9     | 6     | 6     | 4     | 4     |     |      |    |    |
| Q9WVA4 | Transgelin-2                                                      | 3.401 | 1.854 | 2.101 | 2.110 | 1.478 | 0.067 | 0.071 | 0.094 | 0.024 | 0.047 | 199 | 1225 | 17 | 81 |
|        |                                                                   | 0     | 0     | 0     | 0     | 0     | 3     | 8     | 8     | 7     | 7     |     |      |    |    |
| P32020 | Non-specific lipid-transfer protein                               | 2.582 | 1.706 | 2.291 | 1.865 | 1.472 | 0.181 | 0.163 | 0.061 | 0.055 | 0.049 | 547 | 748  | 13 | 19 |
|        |                                                                   | 0     | 0     | 0     | 0     | 0     | 2     | 9     | 5     | 0     | 0     |     |      |    |    |
| Q9DCD0 | 6-phosphogluconate dehydrogenase, decarboxylating                 | 3.487 | 2.143 | 2.760 | 2.049 | 1.436 | 0.060 | 0.032 | 0.021 | 0.028 | 0.057 | 483 | 1826 | 29 | 73 |
|        |                                                                   | 0     | 0     | 0     | 0     | 0     | 9     | 6     | 3     | 9     | 2     |     |      |    |    |
| Q9WTP6 | Adenylate kinase 2, mitochondrial                                 | 2.703 | 1.676 | 2.596 | 1.867 | 1.405 | 0.155 | 0.166 | 0.030 | 0.046 | 0.065 | 239 | 1432 | 19 | 69 |
|        |                                                                   | 0     | 0     | 0     | 0     | 0     | 9     | 8     | 8     | 5     | 7     |     |      |    |    |
| Q9CPW4 | Actin-related protein 2/3 complex subunit 5                       | 6.228 | 3.931 | 2.901 | 2.152 | 1.256 | 0.004 | 0.001 | 0.052 | 0.043 | 0.390 | 151 | 153  | 7  | 60 |
|        |                                                                   | 0     | 0     | 0     | 0     | 0     | 9     | 9     | 7     | 1     | 6     |     |      |    |    |
| P15379 | CD44 antigen                                                      | 5.509 | 2.717 | 2.895 | 3.291 | 1.089 | 0.016 | 0.072 | 0.076 | 0.008 | 0.629 | 778 | 77   | 4  | 5  |
|        |                                                                   | 0     | 0     | 0     | 0     | 0     | 8     | 2     | 5     | 2     | 4     |     |      |    |    |
| Q6GU68 | Immunoglobulin superfamily containing leucine-rich repeat protein | 4.687 |       |       | 2.944 | 1.076 | 0.035 |       |       | 0.034 | 0.688 | 428 | 55   | 6  | 23 |
|        |                                                                   | 0     |       |       | 0     | 0     | 1     |       |       | 5     | 4     |     |      |    |    |
| P30681 | High mobility group protein B2                                    | 3.271 | 2.454 | 2.260 | 2.160 | 1.435 | 0.150 | 0.089 | 0.182 | 0.032 | 0.201 | 210 | 82   | 5  | 17 |
|        |                                                                   | 0     | 0     | 0     | 0     | 0     | 8     | 5     | 8     | 9     | 5     |     |      |    |    |
| P28063 | Proteasome subunit beta type-8                                    | 3.364 | 1.692 | 2.600 | 2.257 | 1.406 | 0.127 | 0.307 | 0.072 | 0.023 | 0.131 | 276 | 197  | 11 | 46 |
|        |                                                                   | 0     | 0     | 0     | 0     | 0     | 8     | 7     | 7     | 8     | 9     |     |      |    |    |



|        |                                                                          |       |       |       |       |       |       |       |       |       |       |      |      |    |    |
|--------|--------------------------------------------------------------------------|-------|-------|-------|-------|-------|-------|-------|-------|-------|-------|------|------|----|----|
| P61979 | Heterogeneous nuclear ribonucleoprotein K                                | 2.925 | 1.968 | 2.138 | 1.845 | 1.451 | 0.118 | 0.052 | 0.087 | 0.049 | 0.053 | 463  | 1705 | 24 | 57 |
| Q6Y7W8 | GRB10-interacting GYF protein 2                                          | 3.887 | 1.746 | 2.687 | 3.115 | 1.478 | 0.102 | 0.383 | 0.111 | 0.015 | 0.238 | 1291 | 30   | 2  | 2  |
| P11688 | Integrin alpha-5                                                         | 2.607 | 2.238 | 1.663 | 2.533 | 1.498 | 0.362 | 0.213 | 0.611 | 0.046 | 0.273 | 1053 | 70   | 4  | 4  |
| Q9WV91 | Prostaglandin F2 receptor negative regulator                             | 2.429 | 1.982 | 1.655 | 2.294 | 1.158 | 0.376 | 0.139 | 0.502 | 0.019 | 0.338 | 879  | 131  | 11 | 18 |
| P26645 | Myristoylated alanine-rich C-kinase substrate                            | 3.408 | 1.725 | 2.035 | 2.027 | 1.426 | 0.066 | 0.153 | 0.110 | 0.038 | 0.059 | 309  | 719  | 12 | 64 |
| P70245 | 3-beta-hydroxysteroid-Delta(8),Delta(7)-isomerase                        | 2.031 | 2.554 | 2.150 | 4.886 | 1.465 | 0.625 | 0.161 | 0.323 | 0.000 | 0.316 | 230  | 17   | 3  | 25 |
| P09055 | Integrin beta-1                                                          | 2.564 | 2.086 | 1.899 | 1.904 | 1.438 | 0.251 | 0.078 | 0.215 | 0.049 | 0.056 | 798  | 897  | 26 | 39 |
| E9Q7G0 | Nuclear mitotic apparatus protein 1                                      | 2.271 | 1.642 | 1.687 | 2.075 | 1.498 | 0.409 | 0.334 | 0.408 | 0.042 | 0.080 | 2094 | 315  | 30 | 20 |
| Q9EST5 | Acidic leucine-rich nuclear phosphoprotein 32 family member B            | 3.901 | 2.975 | 3.114 | 1.921 | 1.425 | 0.059 | 0.017 | 0.021 | 0.059 | 0.137 | 272  | 229  | 5  | 33 |
| O54931 | A-kinase anchor protein 2                                                | 3.997 | 1.844 | 4.489 | 2.148 | 1.238 | 0.084 | 0.347 | 0.006 | 0.081 | 0.481 | 893  | 44   | 5  | 9  |
| Q8R422 | CD109 antigen                                                            | 3.194 | 1.776 | 7.080 | 1.966 | 1.189 | 0.188 | 0.480 | 0.000 | 0.150 | 0.568 | 1442 | 15   | 4  | 4  |
| Q9D0B5 | Thiosulfate sulfurtransferase/rhodanese-like domain-containing protein 3 | 5.542 | 3.763 | 3.494 |       | 0.612 | 0.025 | 0.024 | 0.053 |       | 0.458 | 157  | 31   | 3  | 25 |
| P18242 | Cathepsin D                                                              | 4.048 | 2.412 | 2.164 | 1.827 | 1.254 | 0.032 | 0.015 | 0.082 | 0.052 | 0.126 | 410  | 1082 | 12 | 42 |
| P62962 | Profilin-1                                                               | 3.063 | 1.990 | 1.991 | 1.765 | 1.401 | 0.100 | 0.049 | 0.122 | 0.061 | 0.066 | 140  | 1512 | 11 | 77 |
| P62889 | 60S ribosomal protein L30                                                | 2.679 | 5.114 | 2.294 | 1.963 | 1.158 | 0.297 | 0.001 | 0.191 | 0.117 | 0.421 | 115  | 110  | 6  | 54 |
| P18760 | Cofilin-1                                                                | 3.557 | 2.437 | 2.351 | 1.635 | 1.419 | 0.056 | 0.016 | 0.053 | 0.128 | 0.061 | 166  | 1516 | 12 | 70 |
| Q60972 | Histone-binding protein RBBP4                                            | 3.161 | 2.354 | 1.959 | 1.612 | 1.253 | 0.131 | 0.048 | 0.254 | 0.136 | 0.232 | 425  | 440  | 9  | 67 |
| P27773 | Protein disulfide-isomerase A3                                           | 2.948 | 2.075 | 1.869 | 1.766 | 1.202 | 0.115 | 0.039 | 0.161 | 0.061 | 0.157 | 505  | 2006 | 33 | 71 |
| Q61543 | Golgi apparatus protein 1                                                | 2.800 | 2.144 | 1.773 | 1.530 | 1.121 | 0.138 | 0.032 | 0.201 | 0.117 | 0.222 | 1175 | 533  | 22 | 19 |
| P09541 | Myosin light chain 4                                                     | 6.709 | 2.827 | 3.082 | 2.111 | 1.272 | 0.005 | 0.061 | 0.059 | 0.097 | 0.431 | 193  | 232  | 5  | 47 |
| Q9D8Y0 | EF-hand domain-containing protein D2                                     | 4.534 | 2.128 | 2.243 | 1.808 | 1.432 | 0.038 | 0.171 | 0.214 | 0.127 | 0.256 | 240  | 167  | 9  | 32 |
| P63276 | 40S ribosomal protein S17                                                | 4.714 | 2.610 | 3.361 | 1.470 | 2.178 | 0.023 | 0.030 | 0.012 | 0.245 | 0.006 | 135  | 251  | 6  | 56 |
| P62702 | 40S ribosomal protein S4, X isoform                                      | 2.801 | 2.297 | 3.020 | 0.827 | 1.509 | 0.138 | 0.047 | 0.012 | 0.926 | 0.041 | 263  | 575  | 23 | 68 |
| P62245 | 40S ribosomal protein S15a                                               | 3.146 | 2.598 | 3.289 | 0.959 | 1.652 | 0.150 | 0.036 | 0.012 | 0.891 | 0.046 | 130  | 261  | 9  | 69 |
| P14131 | 40S ribosomal protein S16                                                | 3.606 | 3.904 | 3.387 | 1.049 | 1.813 | 0.093 | 0.001 | 0.013 | 0.706 | 0.022 | 146  | 266  | 6  | 40 |
| Q9D1R9 | 60S ribosomal protein L34                                                | 3.877 | 1.840 | 3.271 | 0.893 | 2.141 | 0.084 | 0.316 | 0.037 | 0.884 | 0.035 | 117  | 200  | 6  | 38 |
| P62900 | 60S ribosomal protein L31                                                | 3.089 | 1.564 | 3.015 | 0.802 | 1.697 | 0.162 | 0.393 | 0.032 | 0.728 | 0.046 | 125  | 94   | 3  | 20 |
| P62270 | 40S ribosomal protein S18                                                | 3.305 | 1.998 | 3.142 | 1.077 | 1.691 | 0.082 | 0.080 | 0.009 | 0.519 | 0.018 | 152  | 385  | 10 | 45 |

|        |                                  |       |       |       |       |       |       |       |       |       |       |     |      |    |    |
|--------|----------------------------------|-------|-------|-------|-------|-------|-------|-------|-------|-------|-------|-----|------|----|----|
| P01791 | Ig heavy chain V region          | 5.771 | 10.06 | 2.153 | 1.166 | 2.692 | 0.018 | 0.000 | 0.287 | 0.723 | 0.014 | 123 | 36   | 3  | 49 |
|        | HPCM6                            | 0     | 30    | 0     | 0     | 0     | 1     | 0     | 7     | 4     | 9     |     |      |    |    |
| Q91VC  | Eukaryotic initiation factor 4A- | 3.715 | 1.885 | 2.173 | 1.392 | 2.074 | 0.105 | 0.299 | 0.230 | 0.443 | 0.049 | 411 | 246  | 7  | 26 |
| 3      | III                              | 0     | 0     | 0     | 0     | 0     | 5     | 2     | 7     | 2     | 4     |     |      |    |    |
| P62908 | 40S ribosomal protein S3         | 2.890 | 1.889 | 2.381 | 0.913 | 1.533 | 0.123 | 0.065 | 0.050 | 0.635 | 0.037 | 243 | 873  | 21 | 80 |
|        |                                  | 0     | 0     | 0     | 0     | 0     | 9     | 3     | 1     | 8     | 5     |     |      |    |    |
| Q99N9  | 39S ribosomal protein L27, mi-   | 2.103 | 1.706 | 2.435 | 0.772 | 2.740 | 0.591 | 0.440 | 0.172 | 0.624 | 0.013 | 148 | 21   | 4  | 38 |
| 2      | tochondrial                      | 0     | 0     | 0     | 0     | 0     | 4     | 7     | 0     | 9     | 3     |     |      |    |    |
| Q5FW   | Rho GTPase-activating protein    | 3.922 | 2.177 | 2.543 | 1.348 | 1.801 | 0.058 | 0.146 | 0.102 | 0.369 | 0.047 | 439 | 229  | 12 | 42 |
| K3     | 1                                | 0     | 0     | 0     | 0     | 0     | 8     | 8     | 5     | 0     | 0     |     |      |    |    |
| Q6ZW   | 60S ribosomal protein L10        | 2.906 | 1.568 | 2.624 | 0.832 | 1.629 | 0.196 | 0.393 | 0.068 | 0.820 | 0.046 | 214 | 254  | 9  | 46 |
| V3     |                                  | 0     | 0     | 0     | 0     | 0     | 7     | 0     | 9     | 3     | 8     |     |      |    |    |
| P70261 | Paladin                          | 2.660 | 2.054 | 2.977 | 1.230 | 3.045 | 0.305 | 0.324 | 0.092 | 0.596 | 0.017 | 859 | 6    | 2  | 4  |
|        |                                  | 0     | 0     | 0     | 0     | 0     | 2     | 6     | 2     | 8     | 6     |     |      |    |    |
| Q9CPR  | 60S ribosomal protein L17        | 3.417 | 1.774 | 2.470 | 0.920 | 1.719 | 0.098 | 0.254 | 0.092 | 0.967 | 0.035 | 184 | 159  | 7  | 42 |
| 4      |                                  | 0     | 0     | 0     | 0     | 0     | 7     | 4     | 9     | 1     | 9     |     |      |    |    |
| P31725 | Protein S100-A9                  | 16.82 | 8.361 | 4.926 | 1.221 | 1.998 | 0.000 | 0.000 | 0.002 | 0.651 | 0.054 | 113 | 212  | 9  | 74 |
|        |                                  | 90    | 0     | 0     | 0     | 0     | 0     | 0     | 8     | 5     | 4     |     |      |    |    |
| Q9JIK9 | 28S ribosomal protein S34, mi-   | 2.951 | 2.465 | 3.196 | 1.490 | 1.665 | 0.224 | 0.107 | 0.042 | 0.373 | 0.146 | 218 | 10   | 2  | 10 |
|        | tochondrial                      | 0     | 0     | 0     | 0     | 0     | 1     | 1     | 0     | 4     | 5     |     |      |    |    |
| P12970 | 60S ribosomal protein L7a        | 3.378 | 2.119 | 3.424 | 0.641 | 1.544 | 0.118 | 0.084 | 0.011 | 0.403 | 0.071 | 266 | 251  | 13 | 42 |
|        |                                  | 0     | 0     | 0     | 0     | 0     | 9     | 3     | 2     | 0     | 9     |     |      |    |    |
| Q6447  | Glutathione S-transferase theta- | 3.485 | 2.215 | 4.089 | 1.358 | 1.982 | 0.122 | 0.221 | 0.014 | 0.532 | 0.078 | 240 | 118  | 2  | 19 |
| 1      | 1                                | 0     | 0     | 0     | 0     | 0     | 9     | 7     | 2     | 0     | 8     |     |      |    |    |
| P61255 | 60S ribosomal protein L26        | 3.788 | 3.019 | 2.580 | 0.723 | 1.570 | 0.085 | 0.031 | 0.096 | 0.466 | 0.105 | 145 | 138  | 7  | 43 |
|        |                                  | 0     | 0     | 0     | 0     | 0     | 2     | 5     | 2     | 4     | 0     |     |      |    |    |
| Q9EPB  | Apoptosis-associated speck-      | 3.486 | 4.794 | 2.715 | 0.810 | 1.672 | 0.118 | 0.001 | 0.077 | 0.602 | 0.127 | 193 | 121  | 10 | 66 |
| 4      | like protein containing a        | 0     | 0     | 0     | 0     | 0     | 7     | 6     | 1     | 5     | 7     |     |      |    |    |
|        | CARD                             |       |       |       |       |       |       |       |       |       |       |     |      |    |    |
| Q9D0T  | NHP2-like protein 1              | 4.215 | 4.740 | 2.927 | 1.429 | 1.551 | 0.065 | 0.002 | 0.068 | 0.443 | 0.218 | 128 | 107  | 5  | 62 |
| 1      |                                  | 0     | 0     | 0     | 0     | 0     | 6     | 1     | 9     | 3     | 5     |     |      |    |    |
| Q91W   | Protein Dr1                      | 3.068 | 5.659 | 2.361 | 1.363 | 1.555 | 0.206 | 0.002 | 0.225 | 0.475 | 0.278 | 176 | 5    | 2  | 18 |
| V0     |                                  | 0     | 0     | 0     | 0     | 0     | 8     | 7     | 0     | 9     | 8     |     |      |    |    |
| Q6159  | Rho GDP-dissociation inhibitor   | 4.514 | 3.114 | 2.734 | 1.385 | 1.387 | 0.028 | 0.006 | 0.044 | 0.293 | 0.142 | 200 | 311  | 12 | 66 |
| 9      | 2                                | 0     | 0     | 0     | 0     | 0     | 3     | 7     | 8     | 7     | 4     |     |      |    |    |
| P0DO   | Interferon-activable protein     | 7.513 | 5.672 | 4.681 | 0.938 | 1.138 | 0.006 | 0.002 | 0.013 | 0.977 | 0.632 | 425 | 32   | 2  | 18 |
| V1     | 205-B                            | 0     | 0     | 0     | 0     | 0     | 2     | 9     | 2     | 4     | 2     |     |      |    |    |
| P35979 | 60S ribosomal protein L12        | 4.102 | 2.727 | 2.856 | 0.729 | 1.490 | 0.042 | 0.024 | 0.043 | 0.521 | 0.099 | 165 | 192  | 7  | 59 |
|        |                                  | 0     | 0     | 0     | 0     | 0     | 5     | 9     | 8     | 4     | 9     |     |      |    |    |
| Q9CZ   | 40S ribosomal protein S19        | 3.298 | 2.349 | 2.697 | 1.211 | 1.444 | 0.080 | 0.041 | 0.024 | 0.355 | 0.055 | 145 | 521  | 9  | 54 |
| X8     |                                  | 0     | 0     | 0     | 0     | 0     | 7     | 7     | 6     | 1     | 2     |     |      |    |    |
| P47911 | 60S ribosomal protein L6         | 3.012 | 2.428 | 2.672 | 0.737 | 1.367 | 0.146 | 0.034 | 0.038 | 0.659 | 0.078 | 296 | 440  | 19 | 47 |
|        |                                  | 0     | 0     | 0     | 0     | 0     | 1     | 3     | 2     | 3     | 7     |     |      |    |    |
| P63325 | 40S ribosomal protein S10        | 2.907 | 2.843 | 3.010 | 0.884 | 1.398 | 0.218 | 0.022 | 0.032 | 0.944 | 0.139 | 165 | 222  | 7  | 43 |
|        |                                  | 0     | 0     | 0     | 0     | 0     | 7     | 2     | 4     | 7     | 5     |     |      |    |    |
| P97351 | 40S ribosomal protein S3a        | 2.714 | 1.889 | 2.501 | 0.899 | 1.360 | 0.169 | 0.145 | 0.038 | 0.838 | 0.079 | 264 | 668  | 18 | 59 |
|        |                                  | 0     | 0     | 0     | 0     | 0     | 2     | 6     | 1     | 3     | 7     |     |      |    |    |
| P25444 | 40S ribosomal protein S2         | 2.878 | 1.511 | 2.629 | 0.869 | 1.104 | 0.162 | 0.337 | 0.032 | 0.991 | 0.238 | 293 | 535  | 16 | 53 |
|        |                                  | 0     | 0     | 0     | 0     | 0     | 9     | 5     | 7     | 7     | 9     |     |      |    |    |
| P33622 | Apolipoprotein C-III             | 2.167 | 1.924 | 3.184 | 1.308 | 1.299 | 0.550 | 0.248 | 0.041 | 0.467 | 0.279 | 99  | 139  | 2  | 27 |
|        |                                  | 0     | 0     | 0     | 0     | 0     | 7     | 2     | 7     | 2     | 5     |     |      |    |    |
| P68254 | 14-3-3 protein theta             | 2.875 | 1.751 | 2.532 | 1.372 | 1.367 | 0.169 | 0.203 | 0.049 | 0.269 | 0.077 | 245 | 1548 | 11 | 70 |
|        |                                  | 0     | 0     | 0     | 0     | 0     | 4     | 5     | 7     | 4     | 3     |     |      |    |    |
| Q8K2H  | Deubiquitinase OTUD6B            | 2.068 | 1.642 | 4.200 | 1.346 | 1.261 | 0.624 | 0.467 | 0.012 | 0.481 | 0.465 | 294 | 24   | 3  | 17 |
| 2      |                                  | 0     | 0     | 0     | 0     | 0     | 4     | 7     | 0     | 3     | 2     |     |      |    |    |
| O5514  | 60S ribosomal protein L35a       | 1.908 | 1.783 | 2.746 | 1.171 | 1.418 | 0.606 | 0.199 | 0.035 | 0.471 | 0.062 | 110 | 189  | 6  | 45 |
| 2      |                                  | 0     | 0     | 0     | 0     | 0     | 3     | 3     | 7     | 9     | 1     |     |      |    |    |



|         |                                                                          |       |       |       |       |       |       |       |       |       |       |      |      |    |     |
|---------|--------------------------------------------------------------------------|-------|-------|-------|-------|-------|-------|-------|-------|-------|-------|------|------|----|-----|
| P62242  | 40S ribosomal protein S8                                                 | 2.966 | 1.959 | 2.800 | 0.848 | 1.471 | 0.153 | 0.115 | 0.034 | 0.881 | 0.076 | 208  | 381  | 13 | 59  |
| Q3V1T4  | Prolyl 3-hydroxylase 1                                                   | 7.024 | 4.119 | 2.324 | 0.753 | 1.204 | 0.007 | 0.015 | 0.253 | 0.670 | 0.532 | 739  | 60   | 5  | 9   |
| P61514  | 60S ribosomal protein L37a                                               | 5.843 | 3.187 | 2.587 | 0.688 | 1.466 | 0.013 | 0.027 | 0.119 | 0.549 | 0.271 | 92   | 66   | 6  | 47  |
| P97742  | Carnitine O-palmitoyltransferase 1, liver isoform                        | 2.026 | 3.541 | 1.915 | 0.724 | 1.067 | 0.654 | 0.036 | 0.446 | 0.631 | 0.716 | 773  | 82   | 5  | 13  |
| Q9CR57  | 60S ribosomal protein L14                                                | 3.351 | 2.875 | 2.491 | 0.667 | 1.449 | 0.120 | 0.020 | 0.087 | 0.366 | 0.118 | 217  | 170  | 7  | 32  |
| Q8CCFU0 | small nuclear ribonucleoprotein Prp31                                    | 2.323 | 4.918 | 2.285 | 0.831 | 0.850 | 0.469 | 0.006 | 0.278 | 0.831 | 0.918 | 499  | 11   | 3  | 11  |
| P21958  | Antigen peptide transporter 1                                            | 1.980 | 4.304 | 1.633 | 1.046 | 1.340 | 0.676 | 0.005 | 0.651 | 0.834 | 0.421 | 724  | 17   | 5  | 10  |
| Q99MD9  | Nuclear autoantigenic sperm protein                                      | 3.121 | 3.911 | 2.608 | 1.497 | 1.217 | 0.205 | 0.025 | 0.175 | 0.402 | 0.526 | 773  | 10   | 2  | 5   |
| P53026  | 60S ribosomal protein L10a                                               | 4.118 | 2.019 | 2.076 | 0.815 | 1.281 | 0.044 | 0.104 | 0.151 | 0.888 | 0.130 | 217  | 210  | 8  | 38  |
| P56528  | ADP-ribosyl cyclase/cyclic ADP-ribose hydrolase 1                        | 13.19 | 6.010 | 2.289 | 0.641 | 0.574 | 0.000 | 0.000 | 0.260 | 0.459 | 0.400 | 304  | 11   | 2  | 8   |
| P27005  | Protein S100-A8                                                          | 3.414 | 40.17 | 12.34 | 0.468 | 4.419 | 0.154 | 0.000 | 0.000 | 0.209 | 0.001 | 89   | 201  | 7  | 82  |
| Q6ZWV7  | 60S ribosomal protein L35                                                | 3.488 | 1.752 | 3.145 | 0.535 | 1.670 | 0.112 | 0.267 | 0.025 | 0.160 | 0.045 | 123  | 120  | 4  | 28  |
| Q9CZM2  | 60S ribosomal protein L15                                                | 3.094 | 3.065 | 2.754 | 0.569 | 1.812 | 0.165 | 0.019 | 0.054 | 0.179 | 0.032 | 204  | 244  | 11 | 43  |
| P47963  | 60S ribosomal protein L13                                                | 3.365 | 2.516 | 3.644 | 0.564 | 1.550 | 0.115 | 0.039 | 0.010 | 0.184 | 0.078 | 211  | 146  | 7  | 35  |
| Q8R3F5  | Malonyl-CoA-acyl carrier protein transacylase, mitochondrial             | 3.354 | 2.014 | 2.733 | 0.091 | 0.173 | 0.156 | 0.367 | 0.147 | 0.000 | 0.000 | 381  | 63   | 2  | 6   |
| Q9R0P6  | Signal peptidase complex catalytic subunit SEC11A                        | 1.599 | 2.437 |       | 0.406 | 0.257 | 0.968 | 0.155 |       | 0.094 | 0.015 | 179  | 10   | 3  | 26  |
| Q6WKZ8  | E3 ubiquitin-protein ligase UBR2                                         | 4.926 | 2.887 |       | 0.498 | 0.343 | 0.033 | 0.095 |       | 0.205 | 0.068 | 1755 | 9    | 2  | 1   |
| P24668  | Cation-dependent mannose-6-phosphate receptor                            | 2.593 | 2.283 | 0.806 | 3.629 | 2.281 | 0.307 | 0.082 | 0.323 | 0.000 | 0.005 | 278  | 53   | 3  | 11  |
| P01831  | Thy-1 membrane glycoprotein                                              | 3.786 | 1.849 | 1.328 | 2.100 | 1.607 | 0.076 | 0.195 | 0.814 | 0.040 | 0.062 | 162  | 148  | 4  | 31  |
| Q9DBR3  | Armadillo repeat-containing protein 8                                    | 3.625 | 0.956 |       | 1.894 |       | 0.033 | 0.587 |       | 0.188 |       | 673  | 3    | 2  | 4   |
| Q99LX8  | Dolichyl-diphosphooligosaccharide--protein glycosyltransferase subunit 4 | 2.781 | 3.438 | 0.940 | 1.638 | 2.130 | 0.298 | 0.044 | 0.571 | 0.286 | 0.083 | 37   | 28   | 2  | 100 |
| P21614  | Vitamin D-binding protein                                                | 2.829 | 2.522 | 1.463 | 1.787 | 1.252 | 0.133 | 0.011 | 0.405 | 0.065 | 0.127 | 476  | 896  | 24 | 61  |
| P47856  | Glutamine--fructose-6-phosphate aminotransferase [isomerizing] 1         | 2.450 | 7.432 | 1.331 | 1.837 | 0.619 | 0.375 | 0.000 | 0.970 | 0.202 | 0.420 | 697  | 30   | 10 | 20  |
| Q91VH2  | Sorting nexin-9                                                          | 1.963 | 3.020 | 1.348 | 1.803 | 0.010 | 0.672 | 0.076 | 0.863 | 0.253 | 0.000 | 595  | 3    | 3  | 7   |
| P97369  | Neutrophil cytosol factor 4                                              | 3.000 | 0.837 |       | 0.532 |       | 0.032 | 0.446 |       | 0.296 |       | 339  | 5    | 3  | 14  |
| Q9JI91  | Alpha-actinin-2                                                          | 2.515 | 1.613 | 1.332 | 1.209 | 1.484 | 0.196 | 0.139 | 0.538 | 0.285 | 0.046 | 894  | 4531 | 47 | 79  |
| Q8VDW0  | ATP-dependent RNA helicase DDX39A                                        | 1.584 | 3.679 | 0.689 | 1.274 | 0.805 | 0.969 | 0.011 | 0.257 | 0.558 | 0.832 | 427  | 592  | 3  | 37  |

|            |                                                                           |       |       |       |       |       |       |       |       |       |       |      |      |    |    |
|------------|---------------------------------------------------------------------------|-------|-------|-------|-------|-------|-------|-------|-------|-------|-------|------|------|----|----|
| O7043<br>9 | Syntaxin-7                                                                | 2.013 | 2.776 | 1.382 | 1.220 | 0.954 | 0.408 | 0.021 | 0.706 | 0.609 | 0.857 | 261  | 74   | 7  | 30 |
|            |                                                                           | 0     | 0     | 0     | 0     | 0     | 6     | 1     | 3     | 6     | 2     |      |      |    |    |
| P06800     | Receptor-type tyrosine-protein phosphatase C                              | 1.823 | 6.365 | 1.316 | 0.891 | 0.694 | 0.814 | 0.000 | 0.946 | 0.783 | 0.577 | 1293 | 125  | 24 | 28 |
|            |                                                                           | 0     | 0     | 0     | 0     | 0     | 2     | 6     | 8     | 5     | 7     |      |      |    |    |
| Q3UN<br>D0 | Src kinase-associated phospho-protein 2                                   | 1.819 | 3.300 | 1.143 | 1.058 | 0.597 | 0.771 | 0.049 | 0.872 | 0.832 | 0.419 | 358  | 20   | 6  | 19 |
|            |                                                                           | 0     | 0     | 0     | 0     | 0     | 4     | 4     | 0     | 9     | 9     |      |      |    |    |
| Q571E<br>4 | N-acetylgalactosamine-6-sulfatase                                         | 4.059 | 3.473 | 1.257 | 0.494 |       | 0.093 | 0.040 | 0.978 | 0.235 |       | 520  | 25   | 4  | 10 |
|            |                                                                           | 0     | 0     | 0     | 0     |       | 7     | 8     | 1     | 3     |       |      |      |    |    |
| E9QAT<br>4 | Protein transport protein Sec16A                                          | 4.022 | 2.051 | 1.361 | 0.010 | 1.241 | 0.083 | 0.329 | 0.881 | 0.000 | 0.522 | 2357 | 23   | 2  | 1  |
|            |                                                                           | 0     | 0     | 0     | 0     | 0     | 3     | 2     | 3     | 0     | 3     |      |      |    |    |
| Q6NV8<br>3 | U2 snRNP-associated SURP motif-containing protein                         | 1.746 | 4.335 | 1.194 | 0.555 | 0.757 | 0.784 | 0.012 | 0.910 | 0.283 | 0.727 | 1029 | 6    | 2  | 2  |
|            |                                                                           | 0     | 0     | 0     | 0     | 0     | 0     | 7     | 0     | 2     | 2     |      |      |    |    |
| O3589<br>2 | Nuclear autoantigen Sp-100                                                | 1.860 | 2.650 | 1.214 | 0.394 | 0.010 | 0.785 | 0.070 | 0.921 | 0.095 | 0.000 | 482  | 4    | 2  | 3  |
|            |                                                                           | 0     | 0     | 0     | 0     | 0     | 2     | 2     | 7     | 3     | 0     |      |      |    |    |
| Q6229<br>3 | T-cell-specific guanine nucleotide triphosphate-binding protein 1         | 13.50 | 3.069 | 0.840 | 0.595 | 0.470 | 0.000 | 0.072 | 0.396 | 0.403 | 0.204 | 415  | 29   | 9  | 36 |
|            |                                                                           | 40    | 0     | 0     | 0     | 0     | 1     | 4     | 1     | 0     | 3     |      |      |    |    |
| P56542     | Deoxyribonuclease-2-alpha                                                 | 1.950 | 4.945 | 0.460 | 0.776 | 1.051 | 0.698 | 0.001 | 0.072 | 0.719 | 0.753 | 353  | 8    | 2  | 4  |
|            |                                                                           | 0     | 0     | 0     | 0     | 0     | 3     | 7     | 6     | 7     | 5     |      |      |    |    |
| Q3UR<br>D3 | Sarcolemmal membrane-associated protein                                   | 4.272 | 1.462 | 3.719 | 2.733 | 2.177 | 0.044 | 0.512 | 0.008 | 0.006 | 0.007 | 845  | 32   | 6  | 10 |
|            |                                                                           | 0     | 0     | 0     | 0     | 0     | 1     | 9     | 5     | 2     | 5     |      |      |    |    |
| Q8CG<br>N5 | Perilipin-1                                                               | 3.419 | 1.380 | 4.225 | 2.765 | 2.274 | 0.065 | 0.448 | 0.001 | 0.002 | 0.001 | 517  | 1444 | 30 | 71 |
|            |                                                                           | 0     | 0     | 0     | 0     | 0     | 9     | 7     | 0     | 9     | 6     |      |      |    |    |
| Q8R0Y<br>6 | Cytosolic 10-formyltetrahydrofolate dehydrogenase                         | 3.402 | 1.470 | 3.459 | 2.482 | 1.921 | 0.067 | 0.351 | 0.004 | 0.013 | 0.006 | 902  | 1412 | 44 | 68 |
|            |                                                                           | 0     | 0     | 0     | 0     | 0     | 2     | 1     | 7     | 5     | 9     |      |      |    |    |
| P04117     | Fatty acid-binding protein, adipocyte                                     | 2.949 | 1.453 | 2.598 | 2.208 | 1.760 | 0.115 | 0.217 | 0.030 | 0.019 | 0.013 | 132  | 7545 | 8  | 65 |
|            |                                                                           | 0     | 0     | 0     | 0     | 0     | 3     | 1     | 6     | 2     | 9     |      |      |    |    |
| Q6NZ<br>B0 | DnaJ homolog subfamily C member 8                                         | 2.870 | 1.393 | 2.318 | 1.898 | 1.606 | 0.181 | 0.473 | 0.081 | 0.044 | 0.027 | 253  | 119  | 7  | 23 |
|            |                                                                           | 0     | 0     | 0     | 0     | 0     | 1     | 1     | 7     | 2     | 1     |      |      |    |    |
| Q9WV<br>L0 | Maleylacetoacetate isomerase                                              | 2.852 | 1.252 | 2.932 | 1.898 | 1.620 | 0.129 | 0.590 | 0.014 | 0.064 | 0.025 | 216  | 956  | 14 | 82 |
|            |                                                                           | 0     | 0     | 0     | 0     | 0     | 8     | 2     | 6     | 6     | 5     |      |      |    |    |
| Q0542<br>1 | Cytochrome P450 2E1                                                       | 2.829 | 1.393 | 3.139 | 1.629 | 1.953 | 0.289 | 0.704 | 0.029 | 0.239 | 0.033 | 493  | 100  | 15 | 44 |
|            |                                                                           | 0     | 0     | 0     | 0     | 0     | 2     | 6     | 7     | 5     | 5     |      |      |    |    |
| P52196     | Thiosulfate sulfurtransferase                                             | 2.349 | 1.248 | 2.210 | 1.931 | 1.539 | 0.268 | 0.594 | 0.073 | 0.057 | 0.036 | 297  | 640  | 11 | 44 |
|            |                                                                           | 0     | 0     | 0     | 0     | 0     | 1     | 2     | 9     | 3     | 5     |      |      |    |    |
| P50462     | Cysteine and glycine-rich protein 3                                       | 2.326 | 0.790 | 1.706 | 1.669 | 1.787 | 0.336 | 0.442 | 0.339 | 0.117 | 0.011 | 194  | 395  | 9  | 62 |
|            |                                                                           | 0     | 0     | 0     | 0     | 0     | 2     | 4     | 7     | 6     | 7     |      |      |    |    |
| O5502<br>8 | [3-methyl-2-oxobutanoate dehydrogenase [lipoamide]] kinase, mitochondrial |       | 1.017 | 1.552 | 2.530 | 2.957 |       | 0.631 | 0.733 | 0.068 | 0.018 | 412  | 28   | 4  | 17 |
|            |                                                                           |       | 0     | 0     | 0     | 0     |       | 1     | 8     | 9     | 4     |      |      |    |    |
| Q8R05<br>9 | UDP-glucose 4-epimerase                                                   | 2.381 | 1.420 | 2.102 | 2.702 | 1.597 | 0.418 | 0.680 | 0.270 | 0.019 | 0.162 | 347  | 79   | 6  | 27 |
|            |                                                                           | 0     | 0     | 0     | 0     | 0     | 1     | 3     | 0     | 6     | 2     |      |      |    |    |
| P50285     | Dimethylaniline monooxygenase [N-oxide-forming] 1                         | 2.565 | 1.381 | 2.764 | 1.656 | 1.580 | 0.280 | 0.599 | 0.039 | 0.119 | 0.062 | 532  | 413  | 18 | 41 |
|            |                                                                           | 0     | 0     | 0     | 0     | 0     | 0     | 0     | 9     | 3     | 0     |      |      |    |    |
| Q9Z1T<br>2 | Thrombospondin-4                                                          | 2.810 | 1.409 | 2.124 | 1.739 | 1.490 | 0.136 | 0.253 | 0.090 | 0.066 | 0.045 | 963  | 1230 | 23 | 37 |
|            |                                                                           | 0     | 0     | 0     | 0     | 0     | 6     | 0     | 0     | 2     | 2     |      |      |    |    |
| Q66K0<br>8 | Cartilage intermediate layer protein 1                                    | 4.024 | 1.282 | 1.716 | 2.427 | 1.161 | 0.050 | 0.614 | 0.381 | 0.014 | 0.267 | 1184 | 300  | 15 | 15 |
|            |                                                                           | 0     | 0     | 0     | 0     | 0     | 5     | 4     | 6     | 7     | 8     |      |      |    |    |
| Q91V7<br>6 | Ester hydrolase C11orf54 homolog                                          | 2.834 | 1.381 | 2.111 | 1.976 | 1.389 | 0.132 | 0.353 | 0.092 | 0.029 | 0.070 | 315  | 417  | 14 | 70 |
|            |                                                                           | 0     | 0     | 0     | 0     | 0     | 7     | 5     | 8     | 5     | 3     |      |      |    |    |
| P99024     | Tubulin beta-5 chain                                                      | 3.292 | 1.366 | 2.530 | 1.299 | 1.666 | 0.076 | 0.275 | 0.035 | 0.222 | 0.020 | 444  | 1511 | 4  | 73 |
|            |                                                                           | 0     | 0     | 0     | 0     | 0     | 5     | 3     | 7     | 4     | 9     |      |      |    |    |
| O5472<br>4 | Caveolae-associated protein 1                                             | 2.789 | 1.440 | 2.671 | 1.342 | 1.503 | 0.140 | 0.233 | 0.026 | 0.241 | 0.042 | 392  | 1107 | 15 | 42 |
|            |                                                                           | 0     | 0     | 0     | 0     | 0     | 3     | 5     | 0     | 4     | 7     |      |      |    |    |
| Q0592<br>0 | Pyruvate carboxylase, mitochondrial                                       | 2.319 | 1.211 | 2.544 | 1.156 | 1.528 | 0.265 | 0.567 | 0.034 | 0.431 | 0.038 | 1178 | 1055 | 46 | 54 |
|            |                                                                           | 0     | 0     | 0     | 0     | 0     | 2     | 6     | 6     | 9     | 4     |      |      |    |    |
| Q6391<br>8 | Caveolae-associated protein 2                                             | 2.218 | 1.223 | 2.465 | 1.424 | 1.561 | 0.308 | 0.630 | 0.041 | 0.202 | 0.033 | 418  | 542  | 11 | 33 |
|            |                                                                           | 0     | 0     | 0     | 0     | 0     | 8     | 2     | 3     | 0     | 2     |      |      |    |    |

|        |                                                                |       |       |       |       |       |       |       |       |       |       |      |      |    |    |
|--------|----------------------------------------------------------------|-------|-------|-------|-------|-------|-------|-------|-------|-------|-------|------|------|----|----|
| P17225 | Polypyrimidine tract-binding protein 1                         | 3.634 | 1.399 | 2.200 | 1.474 | 1.564 | 0.068 | 0.458 | 0.113 | 0.204 | 0.032 | 527  | 365  | 9  | 39 |
| O3567  | Monoglyceride lipase                                           | 2.224 | 1.168 | 2.538 | 1.165 | 1.354 | 0.369 | 0.697 | 0.035 | 0.411 | 0.081 | 303  | 708  | 15 | 67 |
| Q6071  | Long-chain fatty acid transport protein 1                      | 1.858 | 1.329 | 2.600 | 1.153 | 1.339 | 0.677 | 0.560 | 0.049 | 0.510 | 0.115 | 646  | 319  | 21 | 45 |
| Q9CQ   | Endoplasmic reticulum-Golgi intermediate compartment protein 3 | 2.025 | 1.474 | 5.720 | 1.123 | 1.032 | 0.656 | 0.621 | 0.000 | 0.763 | 0.718 | 383  | 5    | 2  | 4  |
| P68369 | Tubulin alpha-1A chain                                         | 2.813 | 1.425 | 2.383 | 1.102 | 1.416 | 0.136 | 0.320 | 0.049 | 0.482 | 0.062 | 451  | 1279 | 6  | 69 |
| P62862 | 40S ribosomal protein S30                                      | 2.368 | 0.805 | 1.154 | 2.721 | 2.139 | 0.449 | 0.336 | 0.842 | 0.042 | 0.064 | 59   | 9    | 2  | 19 |
| Q9D0L  | mRNA cap guanine-N7 methyltransferase                          | 1.915 | 1.130 | 0.658 | 3.056 | 0.791 | 0.709 | 0.957 | 0.142 | 0.014 | 0.771 | 465  | 19   | 3  | 10 |
| P02535 | Keratin, type I cytoskeletal 10                                | 5.114 | 1.151 | 0.779 | 1.676 | 0.745 | 0.024 | 0.955 | 0.295 | 0.197 | 0.675 | 570  | 29   | 3  | 8  |
| P70444 | BH3-interacting domain death agonist                           | 2.244 | 0.896 | 1.042 | 1.145 | 0.323 | 0.505 | 0.577 | 0.664 | 0.770 | 0.019 | 195  | 5    | 3  | 19 |
| P41241 | Tyrosine-protein kinase CSK                                    | 1.835 | 1.335 | 1.298 | 0.404 | 0.258 | 0.792 | 0.827 | 0.996 | 0.135 | 0.010 | 450  | 12   | 7  | 24 |
| O5478  | Epididymis-specific alpha-mannosidase                          | 1.758 | 0.779 | 1.396 | 0.398 | 0.010 | 0.859 | 0.357 | 0.864 | 0.106 | 0.000 | 1018 | 4    | 2  | 3  |
| Q9Z2V  | Phosphoenolpyruvate carbox-kinase, cytosolic [GTP]             |       | 1.493 | 0.888 | 0.520 | 0.341 |       | 0.709 | 0.456 | 0.209 | 0.041 | 622  | 12   | 3  | 8  |
| Q8BQ3  | Phostensin                                                     | 2.875 | 1.195 | 0.357 | 0.509 | 0.624 | 0.253 | 0.931 | 0.016 | 0.254 | 0.496 | 594  | 9    | 2  | 4  |
| P16460 | Argininosuccinate synthase                                     |       | 0.067 | 0.013 | 0.010 | 0.011 |       | 0.000 | 0.000 | 0.000 | 0.000 | 412  | 18   | 7  | 18 |
| Q6168  | Chromobox protein homolog 5                                    | 0.854 |       | 1.565 | 3.064 | 1.186 | 0.239 |       | 0.673 | 0.018 | 0.563 | 191  | 19   | 3  | 27 |
| P97494 | Glutamate--cysteine ligase catalytic subunit                   | 1.330 | 3.514 | 2.539 | 2.012 | 1.469 | 0.722 | 0.014 | 0.145 | 0.119 | 0.271 | 637  | 24   | 4  | 8  |
| O8887  | Apoptotic protease-activating factor 1                         | 1.465 | 11.70 | 1.681 | 0.010 | 0.967 | 0.931 | 0.000 | 0.605 | 0.000 | 0.921 | 1249 | 4    | 2  | 2  |
| Q0132  | DNA topoisomerase 2-alpha                                      | 1.271 | 3.658 | 1.762 | 0.010 | 0.010 | 0.771 | 0.032 | 0.507 | 0.000 | 0.000 | 1528 | 4    | 2  | 1  |
| O3564  | Annexin A8                                                     | 0.648 |       |       | 0.549 | 0.237 | 0.104 |       |       | 0.293 | 0.007 | 327  | 3    | 3  | 10 |
| O7014  | Neutrophil cytosol factor 2                                    | 1.169 | 10.96 | 0.826 | 1.251 |       | 0.656 | 0.000 | 0.413 | 0.572 |       | 525  | 21   | 5  | 13 |
| P35175 | Stefin-1                                                       | 1.177 | 27.65 | 1.285 | 1.497 | 1.364 | 0.633 | 0.000 | 0.990 | 0.396 | 0.377 | 97   | 31   | 3  | 40 |
| Q8K42  | Resistin-like gamma                                            | 1.215 | 13.86 | 1.191 | 0.810 | 1.357 | 0.710 | 0.000 | 0.959 | 0.798 | 0.403 | 117  | 10   | 2  | 23 |
| Q99KV  | DnaJ homolog subfamily B member 11                             | 1.249 | 2.660 | 1.081 | 0.691 | 0.010 | 0.749 | 0.114 | 0.772 | 0.540 | 0.000 | 358  | 3    | 2  | 11 |
| Q3THE  | Myosin regulatory light chain 12B                              | 1.163 | 4.756 | 1.114 | 0.682 | 0.528 | 0.613 | 0.002 | 0.754 | 0.561 | 0.293 | 172  | 7    | 2  | 12 |
| P48025 | Tyrosine-protein kinase SYK                                    | 0.768 | 2.305 | 0.663 | 0.435 | 0.271 | 0.219 | 0.187 | 0.200 | 0.150 | 0.010 | 629  | 13   | 5  | 12 |
| O0904  | Napsin-A                                                       | 0.641 | 5.755 | 1.141 | 0.489 | 0.453 | 0.129 | 0.000 | 0.892 | 0.209 | 0.185 | 419  | 18   | 5  | 28 |
| Q6154  | Adhesion G protein-coupled receptor E1                         | 1.215 | 12.24 | 0.010 | 1.754 | 0.010 | 0.663 | 0.000 | 0.000 | 0.258 | 0.000 | 931  | 4    | 2  | 4  |
| P10810 | Monocyte differentiation antigen CD14                          | 1.340 | 8.574 | 0.532 | 0.742 | 0.756 | 0.794 | 0.000 | 0.105 | 0.651 | 0.726 | 366  | 37   | 9  | 38 |

|            |                                                                |       |       |       |       |       |       |       |       |       |       |      |     |    |    |
|------------|----------------------------------------------------------------|-------|-------|-------|-------|-------|-------|-------|-------|-------|-------|------|-----|----|----|
| Q8BT<br>V2 | Cleavage and polyadenylation specificity factor subunit 7      | 0.922 | 1.647 | 0.010 | 0.519 | 0.726 | 0.358 | 0.619 | 0.000 | 0.280 | 0.693 | 471  | 22  | 2  | 7  |
|            |                                                                | 0     | 0     | 0     | 0     | 0     | 9     | 7     | 0     | 6     | 1     |      |     |    |    |
| P28293     | Cathepsin G                                                    | 0.643 | 2.341 | 0.348 | 0.321 | 0.315 | 0.126 | 0.124 | 0.013 | 0.054 | 0.036 | 261  | 22  | 7  | 30 |
|            |                                                                | 0     | 0     | 0     | 0     | 0     | 5     | 3     | 2     | 4     | 8     |      |     |    |    |
| O7045<br>6 | 14-3-3 protein sigma                                           | 0.892 | 1.084 | 1.818 | 0.189 | 0.067 | 0.267 | 0.955 | 0.332 | 0.000 | 0.000 | 248  | 524 | 3  | 32 |
|            |                                                                | 0     | 0     | 0     | 0     | 0     | 6     | 3     | 2     | 1     | 0     |      |     |    |    |
| Q6P9Q<br>6 | FK506-binding protein 15                                       | 0.707 | 0.856 | 1.571 | 0.305 | 0.536 | 0.104 | 0.488 | 0.706 | 0.007 | 0.254 | 1216 | 16  | 3  | 3  |
|            |                                                                | 0     | 0     | 0     | 0     | 0     | 9     | 3     | 5     | 6     | 0     |      |     |    |    |
| Q9CQ<br>N6 | Transmembrane protein 14C                                      | 0.826 | 0.861 | 0.981 | 0.358 | 0.851 | 0.174 | 0.514 | 0.558 | 0.043 | 0.912 | 114  | 95  | 5  | 75 |
|            |                                                                | 0     | 0     | 0     | 0     | 0     | 4     | 7     | 5     | 4     | 7     |      |     |    |    |
| Q9CQ<br>G1 | Putative glutathione-specific gamma-glutamylcyclotransferase 2 | 1.291 | 0.736 | 0.879 | 0.584 | 0.318 | 0.724 | 0.283 | 0.469 | 0.367 | 0.026 | 178  | 5   | 2  | 11 |
|            |                                                                | 0     | 0     | 0     | 0     | 0     | 1     | 3     | 7     | 7     | 0     |      |     |    |    |
| Q9WV<br>G6 | Histone-arginine methyltransferase CARM1                       | 0.731 | 0.846 | 0.660 | 0.450 | 0.216 | 0.143 | 0.492 | 0.154 | 0.119 | 0.001 | 608  | 11  | 2  | 4  |
|            |                                                                | 0     | 0     | 0     | 0     | 0     | 1     | 7     | 9     | 9     | 9     |      |     |    |    |
| P01820     | Ig heavy chain V region PJ14                                   | 0.716 | 0.744 | 0.904 | 0.366 | 0.548 | 0.143 | 0.337 | 0.438 | 0.048 | 0.273 | 115  | 26  | 2  | 28 |
|            |                                                                | 0     | 0     | 0     | 0     | 0     | 8     | 0     | 4     | 2     | 3     |      |     |    |    |
| Q8JZS<br>9 | 39S ribosomal protein L48, mitochondrial                       | 0.906 | 0.701 | 0.835 | 0.327 | 0.389 | 0.270 | 0.272 | 0.353 | 0.011 | 0.053 | 211  | 17  | 3  | 23 |
|            |                                                                | 0     | 0     | 0     | 0     | 0     | 1     | 0     | 3     | 3     | 5     |      |     |    |    |
| P97825     | Jupiter microtubule associated homolog 1                       | 1.374 | 0.969 | 0.901 | 0.283 | 0.448 | 0.771 | 0.683 | 0.450 | 0.004 | 0.115 | 154  | 42  | 3  | 38 |
|            |                                                                | 0     | 0     | 0     | 0     | 0     | 9     | 9     | 0     | 2     | 9     |      |     |    |    |
| Q8BFQ<br>4 | WD repeat-containing protein 82                                | 0.789 | 0.605 | 0.997 | 0.392 | 0.421 | 0.165 | 0.161 | 0.607 | 0.031 | 0.084 | 313  | 26  | 3  | 9  |
|            |                                                                | 0     | 0     | 0     | 0     | 0     | 8     | 9     | 9     | 9     | 0     |      |     |    |    |
| Q3UIU<br>2 | NADH dehydrogenase [ubiquinone] 1 beta subcomplex subunit 6    | 1.044 | 0.645 | 0.915 | 0.419 | 0.597 | 0.403 | 0.214 | 0.487 | 0.045 | 0.380 | 128  | 136 | 3  | 25 |
|            |                                                                | 0     | 0     | 0     | 0     | 0     | 2     | 8     | 3     | 4     | 7     |      |     |    |    |
| Q921L<br>3 | Calcium load-activated calcium channel                         | 0.707 | 0.748 | 0.694 | 0.261 | 0.375 | 0.156 | 0.332 | 0.200 | 0.016 | 0.064 | 188  | 8   | 2  | 15 |
|            |                                                                | 0     | 0     | 0     | 0     | 0     | 0     | 0     | 9     | 5     | 6     |      |     |    |    |
| Q6P9J9     | Anoctamin-6                                                    | 1.262 | 1.002 | 0.010 | 2.080 | 0.720 | 0.717 | 0.635 | 0.000 | 0.154 | 0.658 | 911  | 3   | 2  | 6  |
|            |                                                                | 0     | 0     | 0     | 0     | 0     | 1     | 5     | 0     | 6     | 6     |      |     |    |    |
| Q9JK3<br>8 | Glucosamine 6-phosphate N-acetyltransferase                    | 0.839 | 0.722 | 0.315 | 0.869 | 0.804 | 0.278 | 0.289 | 0.007 | 0.884 | 0.827 | 184  | 20  | 3  | 41 |
|            |                                                                | 0     | 0     | 0     | 0     | 0     | 9     | 9     | 2     | 9     | 5     |      |     |    |    |
| P50428     | Arylsulfatase A                                                | 0.967 | 0.643 | 0.465 | 0.731 | 0.667 | 0.320 | 0.201 | 0.028 | 0.516 | 0.503 | 506  | 18  | 4  | 14 |
|            |                                                                | 0     | 0     | 0     | 0     | 0     | 9     | 3     | 0     | 0     | 2     |      |     |    |    |
| Q9QX<br>K3 | Coatomer subunit gamma-2                                       | 0.693 | 0.711 | 0.010 | 0.705 | 0.010 | 0.310 | 0.670 | 0.000 | 0.942 | 0.000 | 871  | 46  | 2  | 6  |
|            |                                                                | 0     | 0     | 0     | 0     | 0     | 7     | 2     | 0     | 1     | 0     |      |     |    |    |
| Q3TTY<br>5 | Keratin, type II cytoskeletal 2 epidermal                      | 0.986 | 0.617 | 0.333 | 1.216 | 0.230 | 0.410 | 0.160 | 0.010 | 0.653 | 0.005 | 707  | 17  | 4  | 6  |
|            |                                                                | 0     | 0     | 0     | 0     | 0     | 4     | 8     | 6     | 4     | 0     |      |     |    |    |
| P00687     | Alpha-amylase 1                                                | 1.287 | 1.187 | 0.421 | 0.657 | 0.392 | 0.742 | 0.968 | 0.036 | 0.503 | 0.096 | 511  | 3   | 2  | 5  |
|            |                                                                | 0     | 0     | 0     | 0     | 0     | 2     | 0     | 5     | 1     | 8     |      |     |    |    |
| Q8K1X<br>4 | Nck-associated protein 1-like                                  | 1.060 | 1.322 | 0.011 | 0.010 | 0.717 | 0.450 | 0.829 | 0.000 | 0.000 | 0.607 | 1134 | 13  | 3  | 5  |
|            |                                                                | 0     | 0     | 0     | 0     | 0     | 3     | 1     | 0     | 0     | 9     |      |     |    |    |
| P48999     | Arachidonate 5-lipoxygenase                                    | 0.647 | 1.042 | 0.400 | 0.337 | 0.846 | 0.127 | 0.720 | 0.030 | 0.073 | 0.907 | 674  | 7   | 4  | 6  |
|            |                                                                | 0     | 0     | 0     | 0     | 0     | 1     | 7     | 8     | 9     | 3     |      |     |    |    |
| P18528     | Ig heavy chain V region 6.96                                   | 0.666 | 0.740 | 0.338 | 0.507 | 0.819 | 0.069 | 0.313 | 0.004 | 0.130 | 0.852 | 98   | 38  | 2  | 42 |
|            |                                                                | 0     | 0     | 0     | 0     | 0     | 3     | 8     | 7     | 0     | 7     |      |     |    |    |
| Q91Z8<br>3 | Myosin-7                                                       | 0.803 | 0.632 | 0.478 | 0.188 | 0.277 | 0.181 | 0.194 | 0.036 | 0.000 | 0.006 | 1935 | 516 | 3  | 15 |
|            |                                                                | 0     | 0     | 0     | 0     | 0     | 6     | 1     | 6     | 2     | 5     |      |     |    |    |
| Q6064<br>8 | Ganglioside GM2 activator                                      | 0.730 | 0.789 | 0.551 | 0.376 | 0.267 | 0.115 | 0.411 | 0.065 | 0.030 | 0.007 | 193  | 11  | 2  | 16 |
|            |                                                                | 0     | 0     | 0     | 0     | 0     | 6     | 4     | 8     | 4     | 3     |      |     |    |    |
| Q9JHK<br>5 | Pleckstrin                                                     | 1.014 | 1.197 | 0.293 | 0.427 | 0.331 | 0.374 | 0.982 | 0.001 | 0.054 | 0.021 | 350  | 29  | 5  | 26 |
|            |                                                                | 0     | 0     | 0     | 0     | 0     | 3     | 8     | 4     | 4     | 7     |      |     |    |    |
| O0869<br>2 | Neutrophilic granule protein                                   | 0.853 | 1.391 | 0.592 | 0.410 | 0.315 | 0.279 | 0.475 | 0.122 | 0.078 | 0.016 | 167  | 96  | 11 | 60 |
|            |                                                                | 0     | 0     | 0     | 0     | 0     | 7     | 6     | 5     | 6     | 4     |      |     |    |    |
| Q9CY4<br>5 | EEF1A lysine methyltransferase 1                               | 0.849 | 0.655 | 0.552 | 0.495 | 0.255 | 0.271 | 0.224 | 0.090 | 0.230 | 0.006 | 214  | 6   | 2  | 15 |
|            |                                                                | 0     | 0     | 0     | 0     | 0     | 1     | 4     | 9     | 9     | 8     |      |     |    |    |
| Q9WV<br>60 | Glycogen synthase kinase-3 beta                                | 0.799 | 0.607 | 0.577 | 0.444 | 0.361 | 0.176 | 0.177 | 0.085 | 0.052 | 0.036 | 420  | 135 | 4  | 24 |
|            |                                                                | 0     | 0     | 0     | 0     | 0     | 2     | 1     | 2     | 5     | 7     |      |     |    |    |



|            |                                                                            |       |       |       |       |       |       |       |       |       |       |      |      |    |    |
|------------|----------------------------------------------------------------------------|-------|-------|-------|-------|-------|-------|-------|-------|-------|-------|------|------|----|----|
| Q9D71<br>5 | Phospholysine phosphohisti-<br>dine inorganic pyrophosphate<br>phosphatase | 0.610 | 0.613 | 0.592 | 0.403 | 0.363 | 0.087 | 0.180 | 0.119 | 0.078 | 0.043 | 270  | 369  | 10 | 62 |
|            |                                                                            | 0     | 0     | 0     | 0     | 0     | 9     | 8     | 9     | 9     | 0     |      |      |    |    |
| Q6071<br>6 | Prolyl 4-hydroxylase subunit<br>alpha-2                                    | 0.849 | 0.890 | 0.571 | 0.530 | 0.350 | 0.184 | 0.530 | 0.097 | 0.206 | 0.038 | 537  | 9    | 5  | 12 |
|            |                                                                            | 0     | 0     | 0     | 0     | 0     | 7     | 9     | 5     | 3     | 6     |      |      |    |    |
| Q69Z2<br>3 | Dynein heavy chain 17, ax-<br>onemal                                       | 1.034 | 0.674 | 0.594 | 0.405 | 0.403 | 0.402 | 0.258 | 0.106 | 0.030 | 0.062 | 4481 | 107  | 2  | 0  |
|            |                                                                            | 0     | 0     | 0     | 0     | 0     | 9     | 4     | 3     | 4     | 4     |      |      |    |    |
| P63300     | Selenoprotein W                                                            | 0.714 | 0.778 | 0.508 | 0.473 | 0.406 | 0.113 | 0.365 | 0.048 | 0.084 | 0.070 | 88   | 115  | 3  | 50 |
|            |                                                                            | 0     | 0     | 0     | 0     | 0     | 5     | 8     | 8     | 3     | 2     |      |      |    |    |
| P13542     | Myosin-8                                                                   | 0.704 | 0.640 | 0.471 | 0.459 | 0.387 | 0.130 | 0.206 | 0.031 | 0.104 | 0.054 | 1937 | 1448 | 3  | 31 |
|            |                                                                            | 0     | 0     | 0     | 0     | 0     | 1     | 1     | 9     | 0     | 8     |      |      |    |    |
| Q0809<br>3 | Calponin-2                                                                 | 0.917 | 0.940 | 0.488 | 0.492 | 0.446 | 0.260 | 0.701 | 0.035 | 0.137 | 0.109 | 305  | 32   | 4  | 22 |
|            |                                                                            | 0     | 0     | 0     | 0     | 0     | 7     | 7     | 3     | 1     | 4     |      |      |    |    |
| P70158     | Acid sphingomyelinase-like<br>phosphodiesterase 3a                         | 0.904 | 0.813 | 0.462 | 0.539 | 0.498 | 0.301 | 0.492 | 0.029 | 0.216 | 0.222 | 445  | 56   | 5  | 22 |
|            |                                                                            | 0     | 0     | 0     | 0     | 0     | 2     | 5     | 2     | 8     | 5     |      |      |    |    |
| Q91ZR<br>1 | Ras-related protein Rab-4B                                                 | 1.298 | 0.730 | 0.351 | 0.568 | 0.574 | 0.696 | 0.334 | 0.008 | 0.278 | 0.319 | 213  | 3    | 2  | 11 |
|            |                                                                            | 0     | 0     | 0     | 0     | 0     | 1     | 7     | 4     | 1     | 4     |      |      |    |    |
| P01723     | Ig lambda-1 chain V region                                                 | 0.740 | 0.838 | 0.488 | 0.581 | 0.572 | 0.142 | 0.531 | 0.039 | 0.298 | 0.407 | 117  | 26   | 3  | 42 |
|            |                                                                            | 0     | 0     | 0     | 0     | 0     | 3     | 4     | 9     | 3     | 3     |      |      |    |    |
| P48772     | Cytochrome c oxidase subunit<br>8B, mitochondrial                          | 0.753 | 0.267 | 0.718 | 0.299 | 0.480 | 0.224 | 0.000 | 0.324 | 0.011 | 0.247 | 70   | 366  | 3  | 56 |
|            |                                                                            | 0     | 0     | 0     | 0     | 0     | 9     | 6     | 6     | 0     | 9     |      |      |    |    |
| O0860<br>0 | Endonuclease G, mitochondrial                                              | 0.782 | 0.550 | 0.804 | 0.360 | 0.527 | 0.192 | 0.107 | 0.364 | 0.027 | 0.294 | 294  | 261  | 10 | 36 |
|            |                                                                            | 0     | 0     | 0     | 0     | 0     | 0     | 4     | 5     | 8     | 9     |      |      |    |    |
| Q8C0L<br>9 | Glycerophosphocholine phos-<br>phodiesterase GPCPD1                        | 0.648 | 0.464 | 1.067 | 0.503 | 0.421 | 0.077 | 0.040 | 0.715 | 0.104 | 0.094 | 675  | 12   | 4  | 8  |
|            |                                                                            | 0     | 0     | 0     | 0     | 0     | 2     | 9     | 7     | 8     | 7     |      |      |    |    |
| Q9R0G<br>6 | Cartilage oligomeric matrix<br>protein                                     | 0.699 | 0.428 | 0.633 | 0.425 | 0.452 | 0.169 | 0.049 | 0.200 | 0.114 | 0.202 | 755  | 449  | 17 | 35 |
|            |                                                                            | 0     | 0     | 0     | 0     | 0     | 5     | 2     | 0     | 3     | 4     |      |      |    |    |
| P51912     | Neutral amino acid transporter<br>B(0)                                     | 0.862 | 0.443 | 1.065 | 0.355 | 0.388 | 0.262 | 0.036 | 0.703 | 0.068 | 0.084 | 553  | 16   | 4  | 16 |
|            |                                                                            | 0     | 0     | 0     | 0     | 0     | 0     | 3     | 2     | 3     | 1     |      |      |    |    |
| Q8BL<br>Y2 | Threonine--tRNA ligase 2, cy-<br>toplasmic                                 | 0.910 | 0.413 | 0.976 | 0.516 | 0.580 | 0.265 | 0.024 | 0.573 | 0.118 | 0.334 | 790  | 101  | 6  | 11 |
|            |                                                                            | 0     | 0     | 0     | 0     | 0     | 0     | 8     | 6     | 3     | 7     |      |      |    |    |
| Q9EPU<br>0 | Regulator of nonsense tran-<br>scripts 1                                   | 1.004 | 0.435 | 0.475 | 0.795 | 0.660 | 0.374 | 0.035 | 0.034 | 0.660 | 0.533 | 1124 | 67   | 8  | 10 |
|            |                                                                            | 0     | 0     | 0     | 0     | 0     | 7     | 2     | 1     | 0     | 8     |      |      |    |    |
| P0C0A<br>3 | Charged multivesicular body<br>protein 6                                   | 0.789 | 0.522 | 0.405 | 0.759 | 0.620 | 0.158 | 0.068 | 0.013 | 0.532 | 0.411 | 200  | 7    | 3  | 18 |
|            |                                                                            | 0     | 0     | 0     | 0     | 0     | 8     | 5     | 4     | 1     | 2     |      |      |    |    |
| Q69ZS<br>7 | HBS1-like protein                                                          | 0.826 | 0.501 | 0.036 | 0.738 | 0.598 | 0.204 | 0.073 | 0.000 | 0.528 | 0.382 | 682  | 11   | 2  | 4  |
|            |                                                                            | 0     | 0     | 0     | 0     | 0     | 7     | 2     | 0     | 4     | 5     |      |      |    |    |
| P01654     | Ig kappa chain V-III region PC<br>2880/PC 1229                             | 0.710 | 0.514 | 0.394 | 0.226 | 0.305 | 0.098 | 0.052 | 0.007 | 0.000 | 0.007 | 111  | 87   | 4  | 63 |
|            |                                                                            | 0     | 0     | 0     | 0     | 0     | 6     | 9     | 5     | 6     | 1     |      |      |    |    |
| Q3V0K<br>9 | Plastin-1                                                                  | 0.766 | 0.417 | 0.526 | 0.441 | 0.251 | 0.154 | 0.024 | 0.056 | 0.049 | 0.003 | 630  | 159  | 2  | 16 |
|            |                                                                            | 0     | 0     | 0     | 0     | 0     | 4     | 0     | 4     | 7     | 3     |      |      |    |    |
| Q8R0<br>W0 | Epiplakin                                                                  | 0.693 | 0.431 | 0.421 | 0.481 | 0.387 | 0.098 | 0.018 | 0.013 | 0.118 | 0.044 | 6548 | 215  | 2  | 4  |
|            |                                                                            | 0     | 0     | 0     | 0     | 0     | 8     | 3     | 8     | 9     | 1     |      |      |    |    |
| Q8BMJ<br>3 | Eukaryotic translation initiation<br>factor 1A, X-chromosomal              | 0.756 | 0.356 | 0.513 | 0.590 | 0.324 | 0.138 | 0.005 | 0.044 | 0.296 | 0.013 | 144  | 76   | 5  | 36 |
|            |                                                                            | 0     | 0     | 0     | 0     | 0     | 0     | 8     | 2     | 0     | 1     |      |      |    |    |
| E9Q55<br>5 | E3 ubiquitin-protein ligase<br>RNF213                                      | 0.773 | 0.588 | 0.419 | 0.469 | 0.175 | 0.182 | 0.137 | 0.015 | 0.128 | 0.000 | 5152 | 29   | 3  | 1  |
|            |                                                                            | 0     | 0     | 0     | 0     | 0     | 4     | 7     | 1     | 8     | 3     |      |      |    |    |
| Q9D0<br>M5 | Dynein light chain 2, cytoplas-<br>mic                                     | 0.711 | 0.555 | 0.492 | 0.434 | 0.325 | 0.105 | 0.103 | 0.037 | 0.070 | 0.015 | 89   | 605  | 2  | 79 |
|            |                                                                            | 0     | 0     | 0     | 0     | 0     | 5     | 5     | 1     | 4     | 1     |      |      |    |    |
| Q9QX<br>Z0 | Microtubule-actin cross-linking<br>factor 1                                | 0.613 | 0.504 | 0.476 | 0.368 | 0.225 | 0.064 | 0.090 | 0.035 | 0.061 | 0.002 | 7354 | 37   | 8  | 2  |
|            |                                                                            | 0     | 0     | 0     | 0     | 0     | 4     | 7     | 8     | 2     | 5     |      |      |    |    |
| Q91V<br>W3 | SH3 domain-binding glutamic<br>acid-rich-like protein 3                    | 0.643 | 0.501 | 0.250 | 0.494 | 0.334 | 0.075 | 0.051 | 0.000 | 0.146 | 0.019 | 93   | 81   | 4  | 68 |
|            |                                                                            | 0     | 0     | 0     | 0     | 0     | 6     | 6     | 2     | 9     | 7     |      |      |    |    |
| P52760     | 2-iminobutanoate/2-iminopro-<br>panoate deaminase                          | 0.602 | 0.545 | 0.566 | 0.423 | 0.383 | 0.043 | 0.087 | 0.083 | 0.061 | 0.045 | 135  | 67   | 6  | 54 |
|            |                                                                            | 0     | 0     | 0     | 0     | 0     | 4     | 3     | 6     | 5     | 1     |      |      |    |    |
| Q80VJ<br>3 | 2'-deoxynucleoside 5'-phos-<br>phate N-hydrolase 1                         | 0.616 | 0.545 | 0.525 | 0.391 | 0.362 | 0.056 | 0.110 | 0.055 | 0.059 | 0.042 | 173  | 47   | 3  | 25 |
|            |                                                                            | 0     | 0     | 0     | 0     | 0     | 8     | 0     | 8     | 3     | 1     |      |      |    |    |

|            |                                                              |       |       |       |       |       |       |       |       |       |       |      |      |    |    |
|------------|--------------------------------------------------------------|-------|-------|-------|-------|-------|-------|-------|-------|-------|-------|------|------|----|----|
| Q5SX3<br>9 | Myosin-4                                                     | 0.634 | 0.596 | 0.550 | 0.361 | 0.337 | 0.240 | 0.403 | 0.151 | 0.135 | 0.037 | 1939 | 2260 | 24 | 54 |
|            |                                                              | 0     | 0     | 0     | 0     | 0     | 4     | 6     | 8     | 9     | 5     |      |      |    |    |
| Q9JM9<br>9 | Proteoglycan 4                                               | 0.634 | 0.388 | 0.599 | 0.244 | 0.512 | 0.078 | 0.014 | 0.099 | 0.000 | 0.200 | 1054 | 70   | 7  | 22 |
|            |                                                              | 0     | 0     | 0     | 0     | 0     | 4     | 1     | 5     | 5     | 8     |      |      |    |    |
| Q925I1     | ATPase family AAA domain-<br>containing protein 3            | 0.607 | 0.551 | 0.520 | 0.288 | 0.430 | 0.108 | 0.093 | 0.109 | 0.020 | 0.157 | 591  | 10   | 2  | 4  |
|            |                                                              | 0     | 0     | 0     | 0     | 0     | 2     | 2     | 8     | 7     | 8     |      |      |    |    |
| P21956     | Lactadherin                                                  | 1.026 | 0.533 | 0.536 | 0.330 | 0.484 | 0.385 | 0.112 | 0.076 | 0.049 | 0.170 | 463  | 5    | 3  | 6  |
|            |                                                              | 0     | 0     | 0     | 0     | 0     | 7     | 9     | 1     | 7     | 9     |      |      |    |    |
| Q8R55<br>0 | SH3 domain-containing kinase-<br>binding protein 1           | 0.745 | 0.599 | 0.460 | 0.455 | 0.399 | 0.121 | 0.139 | 0.019 | 0.093 | 0.051 | 709  | 81   | 6  | 11 |
|            |                                                              | 0     | 0     | 0     | 0     | 0     | 7     | 0     | 9     | 0     | 4     |      |      |    |    |
| Q91W<br>G0 | Acylcarnitine hydrolase                                      | 0.642 | 0.506 | 0.349 | 0.449 | 0.441 | 0.249 | 0.224 | 0.013 | 0.304 | 0.180 | 561  | 36   | 9  | 26 |
|            |                                                              | 0     | 0     | 0     | 0     | 0     | 6     | 5     | 0     | 3     | 5     |      |      |    |    |
| Q9CQ8<br>6 | Migration and invasion en-<br>hancer 1                       | 0.869 | 0.509 | 0.471 | 0.506 | 0.453 | 0.226 | 0.067 | 0.032 | 0.103 | 0.135 | 115  | 21   | 4  | 38 |
|            |                                                              | 0     | 0     | 0     | 0     | 0     | 8     | 5     | 6     | 7     | 1     |      |      |    |    |
| Q9D2<br>M8 | Ubiquitin-conjugating enzyme<br>E2 variant 2                 | 0.782 | 0.586 | 0.515 | 0.482 | 0.551 | 0.154 | 0.125 | 0.041 | 0.120 | 0.320 | 145  | 424  | 3  | 61 |
|            |                                                              | 0     | 0     | 0     | 0     | 0     | 4     | 2     | 8     | 7     | 6     |      |      |    |    |
| Q91W5<br>9 | RNA-binding motif, single-<br>stranded-interacting protein 1 | 0.702 | 0.459 | 0.573 | 0.430 | 0.489 | 0.088 | 0.047 | 0.082 | 0.081 | 0.179 | 403  | 5    | 3  | 8  |
|            |                                                              | 0     | 0     | 0     | 0     | 0     | 3     | 2     | 0     | 6     | 6     |      |      |    |    |
| P30355     | Arachidonate 5-lipoxygenase-<br>activating protein           | 0.489 | 2.832 | 1.967 | 2.231 | 1.061 | 0.028 | 0.098 | 0.411 | 0.114 | 0.739 | 161  | 26   | 5  | 58 |
|            |                                                              | 0     | 0     | 0     | 0     | 0     | 5     | 0     | 3     | 1     | 5     |      |      |    |    |
| P83870     | PHD finger-like domain-con-<br>taining protein 5A            | 0.489 | 1.763 | 1.713 | 1.022 | 0.598 | 0.030 | 0.476 | 0.583 | 0.878 | 0.411 | 110  | 11   | 3  | 23 |
|            |                                                              | 0     | 0     | 0     | 0     | 0     | 5     | 7     | 6     | 4     | 3     |      |      |    |    |
| P51437     | Cathelicidin antimicrobial pep-<br>tide                      | 0.541 | 16.32 | 1.837 | 0.535 | 0.591 | 0.046 | 0.000 | 0.461 | 0.246 | 0.351 | 172  | 14   | 3  | 25 |
|            |                                                              | 0     | 50    | 0     | 0     | 0     | 4     | 0     | 7     | 5     | 3     |      |      |    |    |
| Q8VCI<br>0 | Phospholipase B-like 1                                       | 0.583 | 2.191 | 0.593 | 0.581 | 0.387 | 0.034 | 0.179 | 0.088 | 0.258 | 0.061 | 550  | 79   | 18 | 43 |
|            |                                                              | 0     | 0     | 0     | 0     | 0     | 7     | 4     | 4     | 9     | 5     |      |      |    |    |
| Q921E<br>2 | Ras-related protein Rab-31                                   | 0.562 | 0.637 |       | 0.281 |       | 0.063 | 0.202 |       | 0.023 |       | 194  | 36   | 2  | 24 |
|            |                                                              | 0     | 0     |       | 0     |       | 5     | 9     |       | 1     |       |      |      |    |    |
| Q3UQ<br>S2 | Leucine-rich single-pass mem-<br>brane protein 1             | 0.167 | 0.899 | 0.630 | 0.681 | 0.479 | 0.000 | 0.579 | 0.137 | 0.376 | 0.155 | 128  | 13   | 2  | 17 |
|            |                                                              | 0     | 0     | 0     | 0     | 0     | 0     | 4     | 8     | 3     | 5     |      |      |    |    |
| Q9Z1T<br>1 | AP-3 complex subunit beta-1                                  | 0.433 | 0.949 | 0.674 | 0.596 | 0.642 | 0.007 | 0.766 | 0.187 | 0.309 | 0.559 | 1105 | 40   | 6  | 8  |
|            |                                                              | 0     | 0     | 0     | 0     | 0     | 6     | 0     | 3     | 7     | 4     |      |      |    |    |
| Q99L2<br>0 | Glutathione S-transferase theta-<br>3                        | 0.509 | 0.751 | 0.708 | 0.244 | 0.248 | 0.021 | 0.351 | 0.199 | 0.009 | 0.005 | 241  | 18   | 2  | 24 |
|            |                                                              | 0     | 0     | 0     | 0     | 0     | 6     | 6     | 3     | 4     | 2     |      |      |    |    |
| Q7TSC<br>1 | Protein PRRC2A                                               | 0.439 | 0.627 | 0.653 | 0.179 | 0.233 | 0.030 | 0.150 | 0.203 | 0.001 | 0.011 | 2158 | 9    | 2  | 2  |
|            |                                                              | 0     | 0     | 0     | 0     | 0     | 7     | 3     | 7     | 2     | 1     |      |      |    |    |
| Q7TN<br>V0 | Protein DEK                                                  | 0.500 | 0.715 | 0.689 | 0.385 | 0.360 | 0.030 | 0.336 | 0.235 | 0.056 | 0.042 | 380  | 39   | 2  | 7  |
|            |                                                              | 0     | 0     | 0     | 0     | 0     | 6     | 2     | 1     | 5     | 0     |      |      |    |    |
| Q5I2A<br>0 | Serine protease inhibitor A3G                                | 0.591 | 1.431 | 0.636 | 0.314 | 0.433 | 0.086 | 0.776 | 0.181 | 0.041 | 0.141 | 440  | 363  | 2  | 12 |
|            |                                                              | 0     | 0     | 0     | 0     | 0     | 7     | 6     | 6     | 8     | 0     |      |      |    |    |
| Q8R4E<br>4 | Myozenin-3                                                   | 0.563 | 0.713 | 0.626 | 0.438 | 0.460 | 0.049 | 0.306 | 0.136 | 0.075 | 0.160 | 245  | 163  | 8  | 40 |
|            |                                                              | 0     | 0     | 0     | 0     | 0     | 7     | 0     | 9     | 8     | 9     |      |      |    |    |
| Q80W2<br>1 | Glutathione S-transferase Mu 7                               | 0.486 | 0.600 | 0.772 | 0.461 | 0.488 | 0.037 | 0.177 | 0.308 | 0.151 | 0.176 | 218  | 1194 | 2  | 51 |
|            |                                                              | 0     | 0     | 0     | 0     | 0     | 1     | 1     | 0     | 2     | 6     |      |      |    |    |
| Q9QZ<br>Q8 | Core histone macro-H2A.1                                     | 0.339 | 0.643 | 0.954 | 0.412 | 0.464 | 0.003 | 0.178 | 0.519 | 0.070 | 0.148 | 372  | 10   | 2  | 5  |
|            |                                                              | 0     | 0     | 0     | 0     | 0     | 6     | 5     | 4     | 8     | 8     |      |      |    |    |
| Q9R09<br>9 | Transducin beta-like protein 2                               | 0.345 | 1.094 | 0.193 |       |       | 0.009 | 0.765 | 0.000 |       |       | 442  | 4    | 2  | 4  |
|            |                                                              | 0     | 0     | 0     |       |       | 4     | 3     | 4     |       |       |      |      |    |    |
| Q8R5F<br>7 | Interferon-induced helicase C<br>domain-containing protein 1 | 0.476 | 0.689 | 0.200 | 0.140 | 0.232 | 0.026 | 0.282 | 0.000 | 0.000 | 0.003 | 1025 | 12   | 2  | 2  |
|            |                                                              | 0     | 0     | 0     | 0     | 0     | 3     | 0     | 1     | 2     | 3     |      |      |    |    |
| Q8BFY<br>6 | Peflin                                                       | 0.530 | 0.737 | 0.492 | 0.366 | 0.212 | 0.030 | 0.331 | 0.038 | 0.019 | 0.000 | 275  | 25   | 3  | 12 |
|            |                                                              | 0     | 0     | 0     | 0     | 0     | 8     | 2     | 9     | 0     | 9     |      |      |    |    |
| P18181     | CD48 antigen                                                 | 0.449 | 1.138 | 0.411 | 0.213 | 0.240 | 0.021 | 0.882 | 0.031 | 0.005 | 0.006 | 240  | 5    | 2  | 7  |
|            |                                                              | 0     | 0     | 0     | 0     | 0     | 0     | 1     | 6     | 6     | 8     |      |      |    |    |
| O7020<br>0 | Allograft inflammatory factor 1                              | 0.504 | 0.646 | 0.530 | 0.296 | 0.201 | 0.024 | 0.215 | 0.061 | 0.007 | 0.000 | 147  | 8    | 2  | 14 |
|            |                                                              | 0     | 0     | 0     | 0     | 0     | 3     | 9     | 9     | 0     | 5     |      |      |    |    |
| P00375     | Dihydrofolate reductase                                      | 0.577 | 0.938 | 0.494 | 0.468 | 0.362 | 0.040 | 0.648 | 0.039 | 0.084 | 0.040 | 187  | 7    | 2  | 14 |
|            |                                                              | 0     | 0     | 0     | 0     | 0     | 6     | 1     | 3     | 1     | 0     |      |      |    |    |



|        |                                   |       |       |       |       |       |       |       |       |       |       |      |       |    |    |
|--------|-----------------------------------|-------|-------|-------|-------|-------|-------|-------|-------|-------|-------|------|-------|----|----|
| Q8BHJ  | F-box-like/WD repeat-contain-     | 0.594 | 0.803 | 0.337 | 0.360 | 0.329 | 0.057 | 0.422 | 0.004 | 0.055 | 0.027 | 514  | 9     | 3  | 5  |
| 5      | ing protein TBL1XR1               | 0     | 0     | 0     | 0     | 0     | 1     | 1     | 2     | 5     | 0     |      |       |    |    |
| A2VD   | Leucine-rich repeat-containing    | 0.010 | 0.938 | 0.594 | 0.529 | 0.010 | 0.000 | 0.536 | 0.162 | 0.310 | 0.000 | 298  | 4     | 2  | 9  |
| H3     | protein 38                        | 0     | 0     | 0     | 0     | 0     | 0     | 8     | 0     | 4     | 0     |      |       |    |    |
| Q6428  | Interferon-induced protein with   | 0.574 | 0.993 | 0.524 | 0.323 | 0.530 | 0.079 | 0.711 | 0.076 | 0.045 | 0.246 | 463  | 7     | 5  | 12 |
| 2      | tetratricopeptide repeats 1       | 0     | 0     | 0     | 0     | 0     | 7     | 6     | 9     | 3     | 9     |      |       |    |    |
| A2A86  | Integrin beta-4                   | 0.065 | 0.092 |       | 0.024 |       | 0.000 | 0.000 |       | 0.000 |       | 1818 | 6     | 3  | 2  |
| 3      |                                   | 0     | 0     |       | 0     |       | 0     | 0     |       | 0     |       |      |       |    |    |
| Q80XN  | D-beta-hydroxybutyrate dehy-      | 0.494 | 0.449 | 0.626 | 0.409 | 0.293 | 0.024 | 0.037 | 0.137 | 0.032 | 0.007 | 343  | 22    | 5  | 15 |
| 0      | drogenase, mitochondrial          | 0     | 0     | 0     | 0     | 0     | 0     | 8     | 7     | 8     | 4     |      |       |    |    |
| P01636 | Ig kappa chain V-V region         | 0.283 | 0.532 | 0.724 | 0.249 | 0.292 | 0.002 | 0.109 | 0.219 | 0.014 | 0.014 | 108  | 10    | 2  | 26 |
|        | MOPC 149                          | 0     | 0     | 0     | 0     | 0     | 0     | 3     | 1     | 0     | 3     |      |       |    |    |
| Q8CHS  | Dehydrogenase/reductase SDR       | 0.488 | 0.523 | 0.694 | 0.368 | 0.345 | 0.040 | 0.136 | 0.291 | 0.051 | 0.043 | 311  | 361   | 16 | 61 |
| 7      | family member 7C                  | 0     | 0     | 0     | 0     | 0     | 8     | 5     | 8     | 3     | 5     |      |       |    |    |
| P10922 | Histone H1.0                      | 0.417 | 0.290 | 0.643 | 0.264 | 0.441 | 0.007 | 0.000 | 0.155 | 0.002 | 0.118 | 194  | 181   | 5  | 28 |
|        |                                   | 0     | 0     | 0     | 0     | 0     | 1     | 9     | 7     | 9     | 6     |      |       |    |    |
| Q8R1Q  | Angiopoietin-related protein 7    | 0.598 | 0.451 | 0.793 | 0.010 | 0.572 | 0.105 | 0.037 | 0.358 | 0.000 | 0.366 | 337  | 3     | 2  | 5  |
| 3      |                                   | 0     | 0     | 0     | 0     | 0     | 4     | 6     | 1     | 0     | 0     |      |       |    |    |
| Q9R02  | Zinc finger Ran-binding do-       | 0.432 | 0.366 | 0.686 | 0.573 | 0.458 | 0.029 | 0.010 | 0.238 | 0.341 | 0.205 | 330  | 2     | 2  | 6  |
| 0      | main-containing protein 2         | 0     | 0     | 0     | 0     | 0     | 8     | 7     | 9     | 2     | 2     |      |       |    |    |
| Q0901  | Neutrophil cytosol factor 1       | 0.408 | 0.500 | 0.611 | 0.410 | 0.538 | 0.005 | 0.066 | 0.123 | 0.055 | 0.299 | 390  | 26    | 9  | 19 |
| 4      |                                   | 0     | 0     | 0     | 0     | 0     | 8     | 2     | 0     | 8     | 8     |      |       |    |    |
| Q8VE   | Mitochondrial intermembrane       | 0.541 | 0.518 | 0.458 | 0.678 | 0.515 | 0.040 | 0.061 | 0.028 | 0.472 | 0.208 | 139  | 70    | 4  | 42 |
| A4     | space import and assembly pro-    | 0     | 0     | 0     | 0     | 0     | 8     | 9     | 9     | 5     | 6     |      |       |    |    |
|        | tein 40                           |       |       |       |       |       |       |       |       |       |       |      |       |    |    |
| P68134 | Actin, alpha skeletal muscle      | 0.364 | 0.339 | 0.245 | 0.219 | 0.266 | 0.030 | 0.031 | 0.001 | 0.010 | 0.006 | 377  | 12040 | 8  | 89 |
|        |                                   | 0     | 0     | 0     | 0     | 0     | 4     | 8     | 0     | 7     | 3     |      |       |    |    |
| Q5ND3  | WD repeat-containing protein      | 0.434 | 0.469 | 0.368 | 0.378 | 0.210 | 0.012 | 0.041 | 0.006 | 0.039 | 0.000 | 1934 | 19    | 2  | 1  |
| 4      | 81                                | 0     | 0     | 0     | 0     | 0     | 4     | 0     | 0     | 3     | 4     |      |       |    |    |
| P09542 | Myosin light chain 3              | 0.181 | 0.171 | 0.173 | 0.153 | 0.326 | 0.000 | 0.000 | 0.000 | 0.000 | 0.029 | 204  | 1136  | 10 | 70 |
|        |                                   | 0     | 0     | 0     | 0     | 0     | 6     | 2     | 0     | 9     | 6     |      |       |    |    |
| P61458 | Pterin-4-alpha-carbinolamine      | 0.010 | 0.010 | 0.010 | 0.010 | 0.010 | 0.000 | 0.000 | 0.000 | 0.000 | 0.000 | 104  | 32    | 3  | 32 |
|        | dehydratase                       | 0     | 0     | 0     | 0     | 0     | 0     | 0     | 0     | 0     | 0     |      |       |    |    |
| Q99K   | T-cell immunomodulatory pro-      | 0.273 | 0.237 | 0.212 | 0.183 | 0.143 | 0.000 | 0.000 | 0.000 | 0.000 | 0.000 | 610  | 3     | 2  | 8  |
| W9     | tein                              | 0     | 0     | 0     | 0     | 0     | 4     | 7     | 1     | 4     | 0     |      |       |    |    |
| P01639 | Ig kappa chain V-V region         | 0.424 | 0.421 | 0.279 | 0.167 | 0.133 | 0.009 | 0.030 | 0.001 | 0.000 | 0.000 | 130  | 5     | 2  | 28 |
|        | MOPC 41                           | 0     | 0     | 0     | 0     | 0     | 1     | 6     | 3     | 1     | 0     |      |       |    |    |
| P58771 | Tropomyosin alpha-1 chain         | 0.306 | 0.253 | 0.184 | 0.213 | 0.256 | 0.013 | 0.004 | 0.000 | 0.009 | 0.004 | 284  | 4093  | 13 | 68 |
|        |                                   | 0     | 0     | 0     | 0     | 0     | 2     | 8     | 1     | 1     | 5     |      |       |    |    |
| Q6411  | Interferon-induced protein with   | 0.177 | 0.433 | 0.108 | 0.059 | 0.125 | 0.000 | 0.034 | 0.000 | 0.000 | 0.000 | 472  | 13    | 6  | 17 |
| 2      | tetratricopeptide repeats 2       | 0     | 0     | 0     | 0     | 0     | 0     | 9     | 0     | 0     | 0     |      |       |    |    |
| P21107 | Tropomyosin alpha-3 chain         | 0.390 | 0.312 | 0.298 | 0.281 | 0.314 | 0.041 | 0.019 | 0.004 | 0.043 | 0.023 | 285  | 1688  | 15 | 69 |
|        |                                   | 0     | 0     | 0     | 0     | 0     | 2     | 1     | 3     | 6     | 0     |      |       |    |    |
| Q0518  | Reticulocalbin-1                  | 0.228 | 0.278 | 0.215 | 0.225 | 0.190 | 0.000 | 0.002 | 0.000 | 0.000 | 0.000 | 325  | 13    | 3  | 10 |
| 6      |                                   | 0     | 0     | 0     | 0     | 0     | 2     | 3     | 1     | 3     | 1     |      |       |    |    |
| P19123 | Troponin C, slow skeletal and     | 0.303 | 0.250 | 0.132 | 0.182 | 0.301 | 0.005 | 0.001 | 0.000 | 0.000 | 0.016 | 161  | 220   | 8  | 55 |
|        | cardiac muscles                   | 0     | 0     | 0     | 0     | 0     | 6     | 2     | 0     | 9     | 9     |      |       |    |    |
| Q6W8   | Purkinje cell protein 4-like pro- | 0.328 | 0.323 | 0.238 | 0.264 | 0.288 | 0.001 | 0.005 | 0.000 | 0.003 | 0.009 | 68   | 24    | 2  | 32 |
| Q3     | tein 1                            | 0     | 0     | 0     | 0     | 0     | 6     | 4     | 3     | 3     | 2     |      |       |    |    |
| Q9WU   | Troponin I, slow skeletal mus-    | 0.122 | 0.088 | 0.088 | 0.066 | 0.212 | 0.000 | 0.000 | 0.000 | 0.000 | 0.000 | 187  | 147   | 7  | 41 |
| Z5     | cle                               | 0     | 0     | 0     | 0     | 0     | 0     | 0     | 0     | 0     | 8     |      |       |    |    |
| Q99J47 | Dehydrogenase/reductase SDR       | 0.218 | 0.138 | 0.210 | 0.127 | 0.079 | 0.000 | 0.000 | 0.000 | 0.000 | 0.000 | 323  | 8     | 2  | 7  |
|        | family member 7B                  | 0     | 0     | 0     | 0     | 0     | 1     | 0     | 1     | 0     | 0     |      |       |    |    |
| Q8R2E  | ERO1-like protein beta            | 0.406 | 0.122 | 0.092 | 0.391 | 0.080 | 0.004 | 0.000 | 0.000 | 0.036 | 0.000 | 467  | 4     | 2  | 7  |
| 9      |                                   | 0     | 0     | 0     | 0     | 0     | 3     | 0     | 0     | 4     | 0     |      |       |    |    |
| Q9JLH  | Tropomodulin-4                    | 0.469 | 0.389 | 0.358 | 0.323 | 0.295 | 0.035 | 0.033 | 0.011 | 0.036 | 0.014 | 345  | 511   | 8  | 44 |
| 8      |                                   | 0     | 0     | 0     | 0     | 0     | 0     | 1     | 3     | 8     | 6     |      |       |    |    |

|         |                                                                                        |       |       |       |       |       |       |       |       |       |       |      |      |    |    |
|---------|----------------------------------------------------------------------------------------|-------|-------|-------|-------|-------|-------|-------|-------|-------|-------|------|------|----|----|
| Q8K2Q5  | Coiled-coil-helix-coiled-coil-helix domain-containing protein 7                        | 0.482 | 0.383 | 0.424 | 0.264 | 0.289 | 0.028 | 0.027 | 0.020 | 0.011 | 0.013 | 85   | 3    | 2  | 19 |
|         |                                                                                        | 0     | 0     | 0     | 0     | 0     | 7     | 6     | 9     | 2     | 0     |      |      |    |    |
| Q9JL62  | Glycolipid transfer protein                                                            | 0.234 | 0.211 | 0.137 | 0.161 | 0.210 | 0.003 | 0.001 | 0.000 | 0.001 | 0.000 | 209  | 35   | 2  | 19 |
|         |                                                                                        | 0     | 0     | 0     | 0     | 0     | 1     | 1     | 0     | 4     | 7     |      |      |    |    |
| O88346  | Troponin T, slow skeletal muscle                                                       | 0.434 | 0.377 | 0.406 | 0.232 | 0.203 | 0.064 | 0.038 | 0.032 | 0.006 | 0.000 | 262  | 453  | 10 | 44 |
|         |                                                                                        | 0     | 0     | 0     | 0     | 0     | 3     | 2     | 7     | 0     | 5     |      |      |    |    |
| Q9QZ47  | Troponin T, fast skeletal muscle                                                       | 0.474 | 0.348 | 0.256 | 0.265 | 0.290 | 0.090 | 0.037 | 0.001 | 0.032 | 0.012 | 272  | 4577 | 13 | 36 |
|         |                                                                                        | 0     | 0     | 0     | 0     | 0     | 7     | 1     | 4     | 1     | 5     |      |      |    |    |
| P58774  | Tropomyosin beta chain                                                                 | 0.416 | 0.296 | 0.235 | 0.246 | 0.294 | 0.054 | 0.013 | 0.000 | 0.021 | 0.014 | 284  | 3802 | 18 | 66 |
|         |                                                                                        | 0     | 0     | 0     | 0     | 0     | 0     | 8     | 7     | 4     | 1     |      |      |    |    |
| Q8BZA9  | Fructose-2,6-bisphosphatase TIGAR                                                      | 0.380 | 0.495 | 0.479 | 0.312 | 0.332 | 0.009 | 0.075 | 0.049 | 0.018 | 0.028 | 269  | 322  | 10 | 59 |
|         |                                                                                        | 0     | 0     | 0     | 0     | 0     | 2     | 5     | 5     | 8     | 0     |      |      |    |    |
| P05977  | Myosin light chain 1/3, skeletal muscle isoform                                        | 0.396 | 0.375 | 0.251 | 0.258 | 0.294 | 0.043 | 0.055 | 0.001 | 0.027 | 0.014 | 188  | 4378 | 15 | 74 |
|         |                                                                                        | 0     | 0     | 0     | 0     | 0     | 8     | 9     | 2     | 7     | 2     |      |      |    |    |
| P70695  | Fructose-1,6-bisphosphatase isozyme 2                                                  | 0.307 | 0.431 | 0.341 | 0.238 | 0.282 | 0.013 | 0.111 | 0.011 | 0.017 | 0.010 | 339  | 974  | 14 | 63 |
|         |                                                                                        | 0     | 0     | 0     | 0     | 0     | 5     | 6     | 2     | 6     | 0     |      |      |    |    |
| P35487  | Pyruvate dehydrogenase E1 component subunit alpha, testis-specific form, mitochondrial | 0.529 | 0.547 | 0.390 | 0.399 | 0.351 | 0.021 | 0.088 | 0.009 | 0.049 | 0.034 | 391  | 99   | 2  | 12 |
|         |                                                                                        | 0     | 0     | 0     | 0     | 0     | 7     | 4     | 2     | 0     | 3     |      |      |    |    |
| Q8CC35  | Synaptopodin                                                                           | 0.536 | 0.517 | 0.415 | 0.349 | 0.356 | 0.024 | 0.069 | 0.013 | 0.019 | 0.030 | 929  | 151  | 13 | 16 |
|         |                                                                                        | 0     | 0     | 0     | 0     | 0     | 2     | 2     | 4     | 2     | 0     |      |      |    |    |
| Q9CU62  | Structural maintenance of chromosomes protein 1A                                       | 0.471 | 0.542 | 0.408 | 0.299 | 0.230 | 0.037 | 0.120 | 0.029 | 0.045 | 0.005 | 1233 | 4    | 3  | 4  |
|         |                                                                                        | 0     | 0     | 0     | 0     | 0     | 4     | 8     | 6     | 7     | 4     |      |      |    |    |
| Q9JIK5  | Nucleolar RNA helicase 2                                                               | 0.489 | 0.495 | 0.393 | 0.318 | 0.236 | 0.030 | 0.078 | 0.014 | 0.024 | 0.003 | 851  | 4    | 2  | 5  |
|         |                                                                                        | 0     | 0     | 0     | 0     | 0     | 2     | 5     | 9     | 6     | 3     |      |      |    |    |
| Q8C494  | Proline-rich protein 33                                                                | 0.426 | 0.469 | 0.407 | 0.297 | 0.337 | 0.025 | 0.096 | 0.022 | 0.015 | 0.037 | 260  | 432  | 16 | 63 |
|         |                                                                                        | 0     | 0     | 0     | 0     | 0     | 0     | 1     | 9     | 8     | 4     |      |      |    |    |
| Q8VC R8 | Myosin light chain kinase 2, skeletal/cardiac muscle                                   | 0.304 | 0.416 | 0.466 | 0.267 | 0.298 | 0.012 | 0.094 | 0.069 | 0.033 | 0.015 | 613  | 967  | 22 | 53 |
|         |                                                                                        | 0     | 0     | 0     | 0     | 0     | 8     | 8     | 6     | 1     | 5     |      |      |    |    |
| Q99J08  | SEC14-like protein 2                                                                   | 0.543 | 0.555 | 0.590 | 0.316 | 0.316 | 0.029 | 0.114 | 0.098 | 0.006 | 0.017 | 403  | 21   | 2  | 4  |
|         |                                                                                        | 0     | 0     | 0     | 0     | 0     | 3     | 1     | 0     | 4     | 5     |      |      |    |    |
| O08911  | Mitogen-activated protein kinase 12                                                    | 0.530 | 0.514 | 0.592 | 0.353 | 0.349 | 0.062 | 0.118 | 0.154 | 0.040 | 0.047 | 367  | 441  | 13 | 53 |
|         |                                                                                        | 0     | 0     | 0     | 0     | 0     | 8     | 5     | 2     | 0     | 5     |      |      |    |    |
| Q8CD91  | SPARC-related modular calcium-binding protein 2                                        | 0.573 | 0.543 | 0.568 | 0.332 | 0.315 | 0.080 | 0.078 | 0.138 | 0.042 | 0.040 | 447  | 7    | 2  | 4  |
|         |                                                                                        | 0     | 0     | 0     | 0     | 0     | 7     | 3     | 9     | 0     | 5     |      |      |    |    |
| Q8C5H8  | NAD kinase 2, mitochondrial                                                            | 0.406 | 0.293 | 0.246 | 0.382 | 0.304 | 0.014 | 0.006 | 0.000 | 0.070 | 0.017 | 452  | 4    | 2  | 6  |
|         |                                                                                        | 0     | 0     | 0     | 0     | 0     | 6     | 3     | 9     | 3     | 1     |      |      |    |    |
| O55239  | Nicotinamide N-methyltransferase                                                       | 0.482 | 0.345 | 0.448 | 0.511 | 0.369 | 0.018 | 0.010 | 0.025 | 0.137 | 0.035 | 264  | 20   | 2  | 8  |
|         |                                                                                        | 0     | 0     | 0     | 0     | 0     | 7     | 0     | 6     | 0     | 8     |      |      |    |    |
| Q9WU R9 | Adenylate kinase 4, mitochondrial                                                      | 0.300 | 0.331 | 0.516 | 0.421 | 0.302 | 0.001 | 0.010 | 0.046 | 0.083 | 0.015 | 223  | 22   | 3  | 13 |
|         |                                                                                        | 0     | 0     | 0     | 0     | 0     | 8     | 4     | 3     | 6     | 6     |      |      |    |    |
| Q8R1G2  | Carboxymethylenebutenolidase homolog                                                   | 0.304 | 0.398 | 0.391 | 0.332 | 0.342 | 0.012 | 0.076 | 0.026 | 0.095 | 0.041 | 245  | 787  | 13 | 66 |
|         |                                                                                        | 0     | 0     | 0     | 0     | 0     | 9     | 0     | 3     | 4     | 3     |      |      |    |    |
| P13412  | Troponin I, fast skeletal muscle                                                       | 0.409 | 0.377 | 0.265 | 0.297 | 0.311 | 0.050 | 0.057 | 0.001 | 0.056 | 0.021 | 182  | 4779 | 12 | 49 |
|         |                                                                                        | 0     | 0     | 0     | 0     | 0     | 3     | 2     | 8     | 8     | 3     |      |      |    |    |
| Q8CI70  | Leucine-rich repeat-containing protein 20                                              | 0.474 | 0.529 | 0.422 | 0.323 | 0.338 | 0.090 | 0.266 | 0.040 | 0.084 | 0.038 | 184  | 443  | 10 | 73 |
|         |                                                                                        | 0     | 0     | 0     | 0     | 0     | 4     | 5     | 9     | 0     | 0     |      |      |    |    |
| P97457  | Myosin regulatory light chain 2, skeletal muscle isoform                               | 0.416 | 0.448 | 0.295 | 0.317 | 0.318 | 0.053 | 0.134 | 0.004 | 0.077 | 0.024 | 169  | 3239 | 20 | 91 |
|         |                                                                                        | 0     | 0     | 0     | 0     | 0     | 9     | 2     | 1     | 8     | 8     |      |      |    |    |
| Q9WU Z7 | SH3 domain-binding glutamic acid-rich protein                                          | 0.475 | 0.410 | 0.362 | 0.336 | 0.338 | 0.091 | 0.076 | 0.016 | 0.065 | 0.038 | 214  | 511  | 9  | 64 |
|         |                                                                                        | 0     | 0     | 0     | 0     | 0     | 1     | 9     | 3     | 5     | 4     |      |      |    |    |
| Q9D7X8  | Gamma-glutamylcyclotransferase                                                         | 0.562 | 0.505 | 0.543 | 0.514 | 0.393 | 0.040 | 0.040 | 0.058 | 0.165 | 0.046 | 188  | 78   | 5  | 34 |
|         |                                                                                        | 0     | 0     | 0     | 0     | 0     | 2     | 1     | 3     | 9     | 6     |      |      |    |    |
| Q08091  | Calponin-1                                                                             | 0.532 | 0.525 | 0.597 | 0.432 | 0.390 | 0.031 | 0.052 | 0.093 | 0.066 | 0.046 | 297  | 26   | 4  | 24 |
|         |                                                                                        | 0     | 0     | 0     | 0     | 0     | 8     | 4     | 3     | 5     | 2     |      |      |    |    |
| Q9ERT9  | Protein phosphatase 1 regulatory subunit 1A                                            | 0.476 | 0.534 | 0.538 | 0.421 | 0.322 | 0.019 | 0.075 | 0.063 | 0.076 | 0.019 | 171  | 79   | 4  | 27 |
|         |                                                                                        | 0     | 0     | 0     | 0     | 0     | 0     | 9     | 8     | 8     | 1     |      |      |    |    |

|        |                                                                      |       |       |       |       |       |       |       |       |       |       |      |      |    |    |
|--------|----------------------------------------------------------------------|-------|-------|-------|-------|-------|-------|-------|-------|-------|-------|------|------|----|----|
| P50431 | Serine hydroxymethyltransferase, cytosolic                           | 0.556 | 0.523 | 0.592 | 0.417 | 0.347 | 0.076 | 0.133 | 0.153 | 0.105 | 0.045 | 478  | 136  | 11 | 35 |
|        |                                                                      | 0     | 0     | 0     | 0     | 0     | 9     | 9     | 4     | 6     | 5     |      |      |    |    |
| Q3TM   | Secernin-3                                                           | 0.497 | 0.521 | 0.481 | 0.367 | 0.325 | 0.107 | 0.251 | 0.081 | 0.144 | 0.028 | 418  | 993  | 20 | 53 |
|        |                                                                      | 0     | 0     | 0     | 0     | 0     | 4     | 4     | 0     | 8     | 9     |      |      |    |    |
| Q6466  | NAD(P)H dehydrogenase [quinone] 1                                    | 0.393 | 0.413 | 0.419 | 0.332 | 0.388 | 0.004 | 0.012 | 0.016 | 0.015 | 0.054 | 274  | 139  | 10 | 42 |
|        |                                                                      | 0     | 0     | 0     | 0     | 0     | 7     | 6     | 8     | 7     | 1     |      |      |    |    |
| P51667 | Myosin regulatory light chain 2, ventricular/cardiac muscle isoform  | 0.303 | 0.288 | 0.239 | 0.233 | 0.386 | 0.005 | 0.004 | 0.000 | 0.007 | 0.088 | 166  | 294  | 9  | 56 |
|        |                                                                      | 0     | 0     | 0     | 0     | 0     | 6     | 5     | 8     | 9     | 1     |      |      |    |    |
| Q6141  | GTPase HRas                                                          | 0.418 | 0.435 | 0.354 | 0.343 | 0.365 | 0.023 | 0.056 | 0.008 | 0.038 | 0.062 | 189  | 213  | 2  | 51 |
|        |                                                                      | 0     | 0     | 0     | 0     | 0     | 9     | 7     | 9     | 4     | 3     |      |      |    |    |
| P13597 | Intercellular adhesion molecule 1                                    | 0.504 | 0.484 | 0.409 | 0.260 | 0.409 | 0.022 | 0.056 | 0.013 | 0.001 | 0.078 | 537  | 10   | 5  | 11 |
|        |                                                                      | 0     | 0     | 0     | 0     | 0     | 8     | 6     | 6     | 4     | 2     |      |      |    |    |
| P40936 | Indolethylamine N-methyltransferase                                  | 0.377 | 0.548 | 0.399 | 0.344 | 0.412 | 0.003 | 0.078 | 0.011 | 0.019 | 0.087 | 264  | 108  | 8  | 33 |
|        |                                                                      | 0     | 0     | 0     | 0     | 0     | 5     | 4     | 4     | 1     | 2     |      |      |    |    |
| A3KG5  | Peptidase M20 domain-containing protein 2                            | 0.538 | 0.505 | 0.588 | 0.384 | 0.402 | 0.026 | 0.060 | 0.094 | 0.036 | 0.064 | 431  | 191  | 12 | 41 |
|        |                                                                      | 0     | 0     | 0     | 0     | 0     | 6     | 6     | 5     | 1     | 1     |      |      |    |    |
| Q9JKL  | NADH dehydrogenase [ubiquinone] 1 alpha subcomplex assembly factor 3 | 0.516 | 0.343 | 0.169 | 0.435 | 0.398 | 0.044 | 0.011 | 0.000 | 0.091 | 0.073 | 185  | 7    | 2  | 12 |
|        |                                                                      | 0     | 0     | 0     | 0     | 0     | 6     | 8     | 0     | 1     | 5     |      |      |    |    |
| P16125 | L-lactate dehydrogenase B chain                                      | 0.366 | 0.312 | 0.373 | 0.291 | 0.386 | 0.031 | 0.019 | 0.019 | 0.051 | 0.087 | 334  | 3262 | 21 | 74 |
|        |                                                                      | 0     | 0     | 0     | 0     | 0     | 0     | 3     | 9     | 7     | 7     |      |      |    |    |
| Q91ZV  | Melanoma inhibitory activity protein 2                               | 0.476 | 0.432 | 0.407 | 0.493 | 0.428 | 0.021 | 0.042 | 0.013 | 0.155 | 0.101 | 1396 | 11   | 3  | 2  |
|        |                                                                      | 0     | 0     | 0     | 0     | 0     | 7     | 0     | 0     | 9     | 1     |      |      |    |    |
| P56375 | Acylphosphatase-2                                                    | 0.423 | 0.385 | 0.337 | 0.362 | 0.366 | 0.057 | 0.064 | 0.010 | 0.138 | 0.063 | 106  | 774  | 7  | 62 |
|        |                                                                      | 0     | 0     | 0     | 0     | 0     | 8     | 5     | 2     | 1     | 9     |      |      |    |    |
| P20801 | Troponin C, skeletal muscle                                          | 0.484 | 0.370 | 0.281 | 0.307 | 0.362 | 0.098 | 0.052 | 0.002 | 0.067 | 0.059 | 160  | 6398 | 12 | 84 |
|        |                                                                      | 0     | 0     | 0     | 0     | 0     | 1     | 0     | 8     | 2     | 3     |      |      |    |    |
| Q9ESZ  | General transcription factor II-I                                    | 0.596 | 0.471 | 0.559 | 0.396 | 0.340 | 0.098 | 0.046 | 0.115 | 0.114 | 0.055 | 998  | 9    | 3  | 3  |
|        |                                                                      | 0     | 0     | 0     | 0     | 0     | 7     | 9     | 8     | 5     | 3     |      |      |    |    |
| P70266 | 6-phosphofructo-2-kinase/fructose-2,6-bisphosphatase 1               | 0.524 | 0.516 | 0.586 | 0.468 | 0.453 | 0.036 | 0.071 | 0.101 | 0.102 | 0.151 | 471  | 166  | 12 | 23 |
|        |                                                                      | 0     | 0     | 0     | 0     | 0     | 6     | 9     | 1     | 9     | 7     |      |      |    |    |
| Q6120  | Platelet-activating factor acetylhydrolase IB subunit gamma          | 0.382 | 0.536 | 0.566 | 0.390 | 0.380 | 0.021 | 0.180 | 0.172 | 0.111 | 0.079 | 232  | 77   | 9  | 63 |
|        |                                                                      | 0     | 0     | 0     | 0     | 0     | 3     | 9     | 2     | 3     | 7     |      |      |    |    |

**Table S3. Functional classification of proteins differentially expressed due to administration of AP-prestimulated CACs.** Proteins changes between SF and SE were classified with IPA. The most probable functions of proteins of interest are shown. Legend: ↑ up-regulated; ↓ down-regulated; ▲ predicted activation increased; ▼ predicted activation decreased.

| Cat-<br>e-<br>go-<br>ries. | Functions                     | p-value  | Activa-<br>tion z-<br>score | Molecules                                                                                                                                                                                                                                                                                                                                                                                                                                                                                                                                                                                                                                                                                                                                                                                                                                              | Proteins |
|----------------------------|-------------------------------|----------|-----------------------------|--------------------------------------------------------------------------------------------------------------------------------------------------------------------------------------------------------------------------------------------------------------------------------------------------------------------------------------------------------------------------------------------------------------------------------------------------------------------------------------------------------------------------------------------------------------------------------------------------------------------------------------------------------------------------------------------------------------------------------------------------------------------------------------------------------------------------------------------------------|----------|
| Cardiovascular<br>Disease  | Artery Occlu-<br>sion         | 6,89E-07 | -2,328 ▼                    | FABP4↑, PLIN1↑, YAP1↑, ABCA1↓, ALOX5↓, ALOX5AP↓, ARG2↓, CA13↓, CD14↓, CD44↓, CD68↓, CTSS↓, F13A1↓, FN1↓, Hrg↓, ITGAM↓, ITGB2↓, LAMP2↓, LCN2↓, LGALS3↓, MPO↓, PCNA↓, PLA2G15↓, PLIN2↓, PLTP↓, PTGES↓, S100A8↓, S100A9↓, THBS1↓                                                                                                                                                                                                                                                                                                                                                                                                                                                                                                                                                                                                                          | 29       |
|                            | Atherosclerosis               | 1,34E-07 | -2,328 ▼                    | FABP4↑, PLIN1↑, YAP1↑, ABCA1↓, ALOX5↓, ALOX5AP↓, ARG2↓, CA13↓, CD14↓, CD44↓, CD68↓, CTSS↓, F13A1↓, FN1↓, ITGAM↓, ITGB2↓, LAMP2↓, LCN2↓, LGALS3↓, MPO↓, PCNA↓, PLA2G15↓, PLIN2↓, PLTP↓, PTGES↓, S100A8↓, S100A9↓, THBS1↓                                                                                                                                                                                                                                                                                                                                                                                                                                                                                                                                                                                                                                | 28       |
| Cell Death and<br>Survival | Cell viability                | 9,78E-08 | -3,278 ▼                    | ACLY↑, BCKDK↑, CRYAB↑, THRSP↑, YAP1↑, ABCA1↓, ACTN4↓, APAF1↓, ASS1↓, B2M↓, CAMP↓, CASP8↓, CD38↓, CD44↓, CD48↓, CYBA↓, EIF3E↓, EMILIN2↓, FLNA↓, FN1↓, HK3↓, IFIH1↓, IGHM↓, IL1RN↓, IQGAP1↓, ITGAM↓, ITGB2↓, LAMP2↓, LCN2↓, LGALS3↓, LGALS3BP↓, LGALS7/LGALS7B↓, LMNA↓, LTF↓, NCF2↓, PCNA↓, PNKP↓, POSTN↓, PRKCD↓, PRPF8↓, PRTN3↓, PTGR1↓, PTPN1↓, PTPN6↓, PTPRC↓, PYCARD↓, RBM39↓, RPL27↓, S100A8↓, S100A9↓, Saa3↓, SEL1L↓, SLC2A3↓, SMARCC2↓, SND1↓, SRC↓, STAT1↓, STAT2↓, SYK↓, THBS1↓, TRIM28↓, UBE2I↓                                                                                                                                                                                                                                                                                                                                               | 62       |
|                            | Cell cytotoxi-<br>city        | 3,13E-07 | -2,382 ▼                    | B2M↓, CD38↓, CD44↓, CD48↓, FN1↓, ITGAM↓, ITGB2↓, LGALS3↓, PLTP↓, PRKCD↓, PTPN6↓, PTPRC↓, SRC↓, STAT1↓, STX7↓, SYK↓, TAP2↓                                                                                                                                                                                                                                                                                                                                                                                                                                                                                                                                                                                                                                                                                                                              | 17       |
| Cellular Move-<br>ment     | Cell movement                 | 4,63E-14 | -4,512 ▼                    | CRYAB↑, FABP4↑, GLUL↑, YAP1↑, ABCA1↓, ABI1↓, ACTB↓, ACTN1↓, ACTN4↓, AGK↓, AIF1↓, ALOX5↓, ALOX5AP↓, AP2M1↓, APAF1↓, APBB1IP↓, ARG1↓, ARHGDIB↓, BGN↓, BIN2↓, C5AR1↓, CAMP↓, CASP8↓, CD14↓, CD38↓, CD44↓, CD48↓, CFH↓, CFL1↓, CLIC1↓, CSK↓, CTSC↓, CTSG↓, CTSH↓, CTSS↓, CTSZ↓, DDX58↓, EIF3E↓, ELANE↓, ELMO1↓, EMILIN2↓, F13A1↓, FLNA↓, FN1↓, FYB1↓, GBP2↓, GC↓, GIT2↓, GNAI2↓, HCLS1↓, Hrg↓, IFI16↓, IFIT2↓, IGHM↓, IL1RN↓, IQGAP1↓, Irgm1↓, ITGAM↓, ITGB2↓, JCHAIN↓, LCN2↓, LCP1↓, LGALS3↓, LGALS3BP↓, LGMN↓, LIPA↓, LMNA↓, LMNB2↓, LSP1↓, LTF↓, MARCKSL1↓, MBOAT7↓, MPO↓, MYL12A↓, NCF2↓, NCF4↓, NCKAP1L↓, NSF↓, OLFM4↓, Orm1↓, P2RX4↓, PARVG↓, PLTP↓, POSTN↓, PRKCD↓, PRTN3↓, PTGES↓, PTPN1↓, PTPN6↓, PTPRC↓, PYCARD↓, RCC2↓, Retnlg↓, RPL13A↓, S100A8↓, S100A9↓, Saa3↓, SKAP2↓, SLC9A3R1↓, SND1↓, SRC↓, STAT1↓, STAT2↓, SYK↓, THBS1↓, UBE2I↓, WASF2↓ | 107      |
| Inflammatory<br>Response   | Inflammatory<br>response      | 1,81E-16 | -3,232 ▼                    | CSRP3↑, FABP4↑, YAP1↑, AIF1↓, ALOX5↓, ALOX5AP↓, AOAHL↓, C1QTNF3↓, C5AR1↓, CAMP↓, CASP8↓, CD14↓, CD38↓, CD44↓, CFH↓, CTSG↓, CTSS↓, CYBA↓, ELANE↓, ELMO1↓, Flg↓, FN1↓, GC↓, GIT2↓, GNAI2↓, IGHM↓, IL1RN↓, ITGAM↓, ITGB2↓, LCN2↓, LCP1↓, LGALS3↓, LGALS3BP↓, LGALS9B↓, LGMN↓, LIPA↓, LSP1↓, LTF↓, Mbl1↓, MPO↓, NCKAP1L↓, Orm1↓, PLIN2↓, PRDX5↓, PRKCD↓, PRTN3↓, PTGES↓, PTPN6↓, PYCARD↓, RPL13A↓, S100A8↓, S100A9↓, SRC↓, STAT1↓, SYK↓, THBS1↓, UBE2I↓, ZBP1↓                                                                                                                                                                                                                                                                                                                                                                                             | 58       |
|                            | Cellular im-<br>mune response | 2,12E-17 | -4,607 ▼                    | YAP1↑, ABCA1↓, C5AR1↓, CAMP↓, CASP8↓, CD14↓, CD180↓, CD38↓, CD44↓, CD48↓, CD68↓, CFH↓, CSK↓, CTSG↓, CTSS↓, CYBA↓, DDX58↓, ELANE↓, ELMO1↓, FLNA↓, FN1↓, HLA-DQB1↓, IFIH1↓, Ighg2a↓, IGHM↓, ITGAM↓, ITGB2↓, LCN2↓, LGALS3↓, LTF↓, Mbl1↓, MPO↓, PLD4↓                                                                                                                                                                                                                                                                                                                                                                                                                                                                                                                                                                                                     | 49       |

|                         |                                      |          |          |                                                                                                                                                                                                                                                                                                                              |    |
|-------------------------|--------------------------------------|----------|----------|------------------------------------------------------------------------------------------------------------------------------------------------------------------------------------------------------------------------------------------------------------------------------------------------------------------------------|----|
|                         |                                      |          |          | POSTN↓, PRKCD↓, PRTN3↓, PTPN6↓, PTPRC↓, PYCARD↓, RAB31↓, S100A8↓, S100A9↓, SRC↓, STAT1↓, SYK↓, TAP1↓, TAPBP↓, THBS1↓, TOP2A↓                                                                                                                                                                                                 |    |
|                         | Neutrophils immune response          | 6,52E-06 | -2,756 ▼ | CAMP↓, CD44↓, CFH↓, FN1↓, ITGAM↓, ITGB2↓, LCN2↓, SYK↓, THBS1↓                                                                                                                                                                                                                                                                | 9  |
|                         | Macrophages immune response          | 1,40E-06 | -2,272 ▼ | ABCA1↓, CAMP↓, CD14↓, CD38↓, CD44↓, DDX58↓, ELMO1↓, ITGAM↓, ITGB2↓, LGALS3↓, Mbl1↓, PTPRC↓, S100A9↓, THBS1↓                                                                                                                                                                                                                  | 14 |
| Free Radical Scavenging | Synthesis of reactive oxygen species | 2,11E-15 | -3,391 ▼ | CRYAB↑, ABCA1↓, ACTB↓, ALOX5↓, ARG1↓, ARHGDIB↓, C5AR1↓, CAMP↓, CASP8↓, CD14↓, CD44↓, CFH↓, CLIC1↓, CSTB↓, CTSG↓, CYBA↓, ELANE↓, FLNA↓, FN1↓, HK3↓, IQGAP1↓, ITGAM↓, ITGB2↓, ITIH4↓, LGALS3↓, LIPA↓, LTF↓, MPO↓, NCF2↓, NCF4↓, PNKP↓, PRKCD↓, PRTN3↓, PTGES↓, PTPN1↓, PTPN6↓, PYCARD↓, RPL26↓, S100A8↓, SLC9A3R1↓, SRC↓, SYK↓ | 42 |

**Table 4.** Classification of protein changes seen between SF (mice treated with pre-stimulated CACs, SF1, SF2 and SF3) and SE (mice treated with unstimulated CACs) was made with IPA, a software based on biomedical literature and integrated databases. The table shows proteins differentially expressed related to DM; including main categories and related functions, p-value, activation z-score, molecules (protein names) and the number of proteins. Legend: ↑ up-regulated; ↓ down-regulated.

|            | Functions                           | p-value  | Activation z-score | Molecules                                                                                                                                                                                                                                                                                                                                                                                                                                                             | Proteins |
|------------|-------------------------------------|----------|--------------------|-----------------------------------------------------------------------------------------------------------------------------------------------------------------------------------------------------------------------------------------------------------------------------------------------------------------------------------------------------------------------------------------------------------------------------------------------------------------------|----------|
| SF1/S<br>E | Diabetes mellitus                   | 1,74E-10 | 1,166              | AACS↑, ABCA1↓, ACACA↑, AEBP1↓, AGPAT2↑, ALDH2↑, ALOX5AP↓, APOBR↓, ARG1↓, C1QTNF3↓, CA13↓, CA5B↑, CAPZA1↓, CASP8↓, CAT↑, CAVIN1↑, CD180↓, CD38↓, CD44↓, COL12A1↓, CYBA↓, CYBB↓, CYP2E1↑, ELMO1↓, EPHX2↑, FABP4↑, FAH↑, FN1↓, HCLS1↓, HLA-DQB1↓, IFI44↓, IFIH1↓, IFIT2↓, IL1RN↓, ITGAM↓, ITGB2↓, LGALS9B↓, ME1↑, MGST1↑, MOGS↓, MPEG1↓, MSR1↑, NCF2↓, PLBD1↓, PLD4↓, PLEK↓, PLIN1↑, PTPN1↓, PTPN6↓, PTPRC↓, SCD↑, Slc25a1↑, SMYD1↑, STAT1↓, STAT2↓, TAP1↓, TAP2↓, ZBP1↓ | 58       |
|            | Insulin-dependent diabetes mellitus | 3,17E-07 |                    | ABCA1↓, ALDH2↑, ALOX5AP↓, APOBR↓, CD180↓, CD38↓, CYBB↓, HCLS1↓, HLA-DQB1↓, IFI44↓, IFIH1↓, IFIT2↓, ITGB2↓, MOGS↓, MPEG1↓, PLBD1↓, PLD4↓, PLEK↓, PTPRC↓, SCD↑, STAT1↓, STAT2↓, TAP1↓, TAP2↓, ZBP1↓                                                                                                                                                                                                                                                                     | 25       |
|            | Lipid conversion                    | 6,86E-08 | 1,425              | ABHD5↑, ACACA↑, ACLY↑, ACOX1↑, ALOX5AP↓, CAT↑, CPT1B↑, CYP2E1↑, FABP4↑, FGFR2↑, LIPE↑, PTGES↓, SCD↑, TECR↑                                                                                                                                                                                                                                                                                                                                                            | 14       |
|            | Fatty acid conversion               | 1,89E-11 | 1,394              | ACACA↑, ACLY↑, ACOX1↑, ALOX5AP↓, CPT1B↑, CYP2E1↑, FABP4↑, FGFR2↑, LIPE↑, PTGES↓, TECR↑                                                                                                                                                                                                                                                                                                                                                                                | 11       |
|            | Lipid Oxidation                     | 6,64E-10 | 0,910              | ABCA1↓, ABHD5↑, ACACA↑, ACADS↑, ACOX1↑, Aldh1a7↑, CAT↑, CPT1B↑, CYP2E1↑, ECI1↑, FABP4↑, HADHB↑, LIPE↑, LRPPRC↑, NUCB2↓, PLIN1↑, PNPLA2↑, SCD↑, SLC27A1↑, SLN↓                                                                                                                                                                                                                                                                                                         | 20       |
| SF2/S<br>E | Fatty acid Oxidation                | 7,53E-10 | 0,891              | ABCA1↓, ABHD5↑, ACACA↑, ACADS↑, ACOX1↑, CPT1B↑, CYP2E1↑, ECI1↑, FABP4↑, HADHB↑, LIPE↑, LRPPRC↑, NUCB2↓, PLIN1↑, PNPLA2↑, SCD↑, SLC27A1↑, SLN↓                                                                                                                                                                                                                                                                                                                         | 18       |
|            | Carbohydrate Metabolism             | 4,66E-05 | 1,364              | ABHD5↑, AGPAT2↑, ALDH2↑, AOAH↓, CD44↓, COQ3↑, CYP2E1↑, FABP4↑, GALNS↓, GBE1↑, GFPT1↓, GNAI1↑, IL1RN↓, ITGB2↓, LIPE↑, MBOAT7↓, PHOSPHO1↑, PLA2G15↓, PLEK↓, PLIN1↑, POSTN↓, PTPN1↓, PTPRC↓, SCD↑, SFN↑, SLC27A1↑, SLC2A3↓, SLC9A3R1↓, SYK↓                                                                                                                                                                                                                              | 29       |
|            | Diabetes mellitus                   | 5,67E-10 | -0,687             | ABCA1↓, AIF1↓, APOBR↓, ARG1↓, ATXN2↑, B2M↓, C1QTNF3↓, C1S↓, CACNG1↓, CAPZA1↓, CASP8↓, CD180↓, CD38↓, CFH↓, COL12A1↓, COL14A1↓, CP↓, CTSH↓, CTSS↓, CYBA↓, ELMO1↓, FABP4↑, FN1↓, GBP2↓, HCLS1↓, Hrg↓, IFI16↓, IFI44↓, IFIH1↓, IFIT2↓, IGHM↓, IL1RN↓, ITGAM↓, ITGB2↓, ITIH4↓, LCP1↓, LGALS3↓, LMNA↓, ME1↑, MOGS↓, MPEG1↓, NCF2↓, OAS1↓, PDXK↓, PLBD1↓, PLD4↓, PLEK↓, PLIN1↑, PRKCD↓, PRRC2A↓, PTPN1↓, PTPN6↓, PTPRC↓, SERPINC1↓, STAT1↓, STAT2↓, TAP1↓, TAP2↓, TTR↓      | 59       |
| SF3/S<br>E | Insulin-dependent diabetes mellitus | 1,23E-11 | -1,090             | ABCA1↓, AIF1↓, APOBR↓, ATXN2↑, B2M↓, CACNG1↓, CD180↓, CD38↓, CFH↓, CTSH↓, CTSS↓, GBP2↓, HCLS1↓, IFI16↓, IFI44↓, IFIH1↓, IFIT2↓, IGHM↓, ITGB2↓, ITIH4↓, LCP1↓, MOGS↓, MPEG1↓, OAS1↓, PLBD1↓, PLD4↓, PLEK↓, PRRC2A↓, PTPRC↓, STAT1↓, STAT2↓, TAP1↓, TAP2↓                                                                                                                                                                                                               | 33       |
|            | Diabetes mellitus                   | 1,50E-13 | -0,193             | ABCA1↓, AEBP1↓, AIF1↓, APOBR↓, APOE↓, ARG1↓, B2M↓, C1QTNF3↓, C1S↓, CA13↓, CACNG1↓, CAPZA1↓, CASP8↓, CD180↓, CD38↓, CD44↓, CFH↓, COL12A1↓, COL14A1↓, CP↓, CTSD↓, CTSH↓, CTSS↓, CYBA↓, ELMO1↓, FN1↓, GBP2↓, GPNMB↓, HLA-DQA1↓, IFI16↓, IFI44↓, IFIT2↓, IGHM↓, IL1RN↓, Irgm1↓, ITGAM↓, ITGB2↓, LCP1↓, LGALS3↓, LGALS9B↓, LMNA↓, MOGS↓, MPEG1↓, NCF2↓, PDXK↓, PEA15↓, PLBD1↓, PLD4↓, PLEK↓, PRRC2A↓, PTPN1↓, PTPN6↓, PTPRC↓, SRC↓, STAT1↓, STAT2↓, TAP1↓, TAP2↓, ZBP1↓    | 59       |
|            | Insulin-dependent diabetes mellitus | 3,40E-13 | -1,090             | ABCA1↓, AIF1↓, APOBR↓, B2M↓, CACNG1↓, CD180↓, CD38↓, CFH↓, CTSH↓, CTSS↓, GBP2↓, GPNMB↓, HLA-DQA1↓, IFI16↓, IFI44↓, IFIT2↓                                                                                                                                                                                                                                                                                                                                             | 32       |



---

IGHM↓, Irgm1↓, ITGB2↓, LCP1↓, MOGS↓, MPEG1↓, PLBD1↓, PLD4↓,  
PLEK↓, PRRC2A↓, PTPRC↓, STAT1↓, STAT2↓, TAP1↓, TAP2↓, ZBP1↓

---

### Supplementary references:

1. Beltran-Camacho, L.; Jimenez-Palomares, M.; Rojas-Torres, M.; Sanchez-Gomar, I.; Rosal-Vela, A.; Eslava-Alcon, S.; Perez-Segura, M. C.; Serrano, A.; Antequera-Gonzalez, B.; Alonso-Pinero, J. A.; Gonzalez-Rovira, A.; Extremera-Garcia, M. J.; Rodriguez-Pinero, M.; Moreno-Luna, R.; Larsen, M. R.; Duran-Ruiz, M. C., Identification of the initial molecular changes in response to circulating angiogenic cells-mediated therapy in critical limb ischemia. *Stem Cell Res Ther* **2020**, *11*, (1), 106.
2. Garcia, S.; Marston, N.; Sandoval, Y.; Pierpont, G.; Adabag, S.; Brenes, J.; Santilli, S.; McFalls, E. O., Prognostic value of 12-lead electrocardiogram and peak troponin I level after vascular surgery. *J Vasc Surg* **2013**, *57*, (1), 166-72.
3. Tarlov, I. M., Spinal cord compression studies. III. Time limits for recovery after gradual compression in dogs. *AMA Arch Neurol Psychiatry* **1954**, *71*, (5), 588-97.
